# Supplementary material for: Metabolomic Analysis of Renal Cell Carcinoma in the Prostate, Lung, Colorectal, and Ovarian Cancer Screening Trial
Source: Metabolites. 2022 Nov 29;12(12):1189. doi: 10.3390/metabo12121189 (PMC9785244; doi:10.3390/metabo12121189)
Supplement: Supplementary file 1 [file metabolites-12-01189-s001.zip › PLCO RCC and Metabolomics Supplemental Data 091722 FINAL.xlsx]

## Sheet: Legend
Model 1	Adjusted for age, sex, race, cigarette smoking status, alcohol consumption, and family history of renal cancer
Model 2	Adjusted for age, sex, race, cigarette smoking status, alcohol consumption, and family history of renal cancer, plus body mass index, physical activity, history of diabetes, and history of hypertension
Model 2A	Removes cases diagnosed within the first 2 years of follow up and adjusted the same as model 2 described above
Model 2B	Uses cases diagnosed under the median time on study (<7.10 years)
Model 2C	Uses cases diagnosed at or above the median time on study (≥7.10 years)

## Sheet: Meta Data
Metabolite	Method	Compound	Mass	Retention Time	HMDB ID	No. Missing	ICC	95% CI	CV	95% CI
C38_4_PI	C8-pos	887.5616m/z_8.5	887.562	8.5	HMDB09815	1	0.91	0.83-0.95	0.06	0.04-0.08
C3_DC_CH3_CARNITINE	HILIC-pos	262.1280m/z_8.72	262.128	8.72	HMDB13133	1	0.96	0.93-0.98	0.07	0.05-0.09
C16_1_SM	C8-pos	701.5592m/z_7.59	701.559	7.59		1	0.94	0.89-0.97	0.07	0.05-0.09
C14_0_SM	C8-pos	675.5433m/z_7.44	675.543	7.44	HMDB12097	1	0.95	0.91-0.97	0.07	0.05-0.1
C5_CARNITINE	HILIC-pos	246.1694m/z_7.95	246.169	7.95	HMDB00688	1	0.98	0.96-0.99	0.07	0.05-0.1
C34_0_PC	C8-pos	762.6006m/z_8.86	762.601	8.86	HMDB07970	1	0.93	0.87-0.97	0.07	0.05-0.1
C3_DC_CARNITINE	HILIC-pos	248.1122m/z_9.62	248.112	9.62	HMDB02095	1	0.83	0.69-0.91	0.25	0.18-0.34
C36_0_PC	C8-pos	790.632m/z_9.27	790.632	9.27	HMDB08036	1	0.91	0.83-0.95	0.09	0.07-0.13
C22_1_SM	C8-pos	785.6534m/z_9.08	785.653	9.08	HMDB12104	1	0.91	0.84-0.95	0.08	0.06-0.11
C36_1_PS_PLASMALOGEN	C8-pos	776.5794m/z_7.94	776.579	7.94		1	0.97	0.94-0.98	0.06	0.04-0.08
URACIL						0	0.8	0.64-0.91	0.26	0.19-0.37
GLUTAMATE	HILIC-pos	148.0601m/z_7.83	148.06	7.83	HMDB00148	1	0.99	0.97-0.99	0.1	0.07-0.14
C36_4_PC_B	C8-pos	782.5687m/z_8.26	782.569	8.26	HMDB08138	1	0.95	0.91-0.97	0.06	0.04-0.08
CYCLIC_AMP						0	0.99	0.98-1	0.07	0.05-0.1
MALIC_ACID						0	0.96	0.92-0.98	0.08	0.06-0.11
_3_METHOXYTYRAMINE	HILIC-pos	168.1017m/z_6.54	168.102	6.54	HMDB00022	231	0.83	0.66-0.92	1.63	0.94-2.86
C34_4_PC	C8-pos	754.5376m/z_7.76	754.538	7.76	HMDB07883	1	0.99	0.98-0.99	0.05	0.04-0.07
C20_0_SM	C8-pos	759.6375m/z_8.98	759.638	8.98	HMDB12102	1	0.93	0.86-0.96	0.08	0.06-0.11
C18_0_CE__NH4	C8-pos	670.65m/z_12.29	670.65	12.29		1	0.87	0.77-0.94	0.09	0.06-0.12
C36_0_PE	C8-pos	748.5855m/z_8.57	748.586	8.57	HMDB08991	1	0.95	0.9-0.97	0.08	0.06-0.11
C34_0_PS	C8-pos	764.5474m/z_7.96	764.547	7.96	HMDB12356	1	0.72	0.51-0.86	0.29	0.21-0.4
N6_ACETYLLYSINE	HILIC-pos	189.1230m/z_8.57	189.123	8.57	HMDB00206	1	0.96	0.92-0.98	0.05	0.03-0.06
C22_1_MAG__NH4	C8-pos	430.3892m/z_6.69	430.389	6.69		2	0.71	0.48-0.87	0.09	0.06-0.13
C22_6_LPE	C8-pos	526.2928m/z_4.56	526.293	4.56	HMDB11526	1	1	1-1	0.02	0-9.1251857E+40
C40_9_PC	C8-pos	828.5504m/z_8.18	828.55	8.18	HMDB08731	1	1	1-1	0.02	0-
C38_6_PC	C8-pos	806.5682m/z_8.19	806.568	8.19	HMDB07991	1		-		-
C30_0_PC	C8-pos	706.5378m/z_7.91	706.538	7.91	HMDB07869	1	0.98	0.97-0.99	0.07	0.05-0.1
SPHINGOSINE_ISOMER1	HILIC-pos	300.2891m/z_2.03	300.289	2.03		1	0.96	0.92-0.98	0.13	0.09-0.18
C22_0_LPE	C8-pos	538.3872m/z_5.52	538.387	5.52		1	0.9	0.83-0.95	0.12	0.09-0.16
C32_2_PC	C8-pos	730.5378m/z_7.73	730.538	7.73	HMDB07874	1	0.98	0.96-0.99	0.06	0.05-0.09
C40_10_PC	C8-pos	826.5354m/z_7.87	826.535	7.87	HMDB08511	1	1	1-1	0.02	0-2.277678E+284
PUTATIVE_URIDINE_PSEUDOURIDINE_3	HILIC-pos	245.0763m/z_4.65	245.076	4.65		1	0.48	0.24-0.73	0.25	0.19-0.33
C24_0_CERAMIDE__D18_1_	C8-pos	650.6446m/z_9.9	650.645	9.9	HMDB04956	1	0.95	0.9-0.97	0.08	0.06-0.11
C38_4_PC	C8-pos	810.6003m/z_8.73	810.6	8.73	HMDB08048	1	0.93	0.87-0.96	0.08	0.06-0.11
C16_0_SM	C8-pos	703.5747m/z_7.95	703.575	7.95	HMDB10169	1	0.92	0.86-0.96	0.07	0.05-0.09
HYPOXANTHINE	HILIC-pos	137.0455m/z_5.03	137.046	5.03	HMDB00157	1	0.97	0.93-0.98	0.07	0.05-0.1
S_ADENOSYL_L_HOMOCYSTEINE						0	0.89	0.79-0.94	0.12	0.09-0.16
CREATININE	HILIC-pos	114.0663m/z_6.69	114.066	6.69	HMDB00562	1	0.99	0.97-0.99	0.03	0.02-0.04
N_ACETYL_L_ASPARTIC_ACID						0	0.85	0.72-0.93	0.1	0.07-0.14
C36_2_PC	C8-pos	786.6007m/z_8.7	786.601	8.7	HMDB08039	1	0.93	0.87-0.96	0.06	0.04-0.08
QUINOLINIC_ACID						0	0.97	0.94-0.98	0.09	0.06-0.12
_2_HYDROXYGLUTARIC_ACID						0	0.92	0.85-0.95	0.09	0.07-0.13
C36_1_PC	C8-pos	788.6167m/z_8.99	788.617	8.99	HMDB08038	1	0.97	0.95-0.99	0.05	0.04-0.07
C34_0_PE	C8-pos	720.5536m/z_8.15	720.554	8.15	HMDB08925	1	0.94	0.89-0.97	0.11	0.08-0.16
_21_DEOXYCORTISOL	HILIC-pos	347.2210m/z_2.03	347.221	2.03	HMDB04030	8	0.98	0.96-0.99	0.15	0.11-0.21
C38_2_PE	C8-pos	772.5847m/z_8.47	772.585	8.47	HMDB08942	1	0.94	0.89-0.97	0.07	0.05-0.1
ECTOINE	HILIC-pos	143.0813m/z_9.12	143.081	9.12		2	0.72	0.53-0.85	0.71	0.53-0.97
PYRUVIC_ACID						0	0.87	0.75-0.93	0.16	0.11-0.22
C16_0_CE__NH4	C8-pos	642.6186m/z_11.86	642.619	11.86		1	0.84	0.7-0.92	0.07	0.05-0.1
LPE_SOURCE_FRAGMENT	HILIC-pos	454.2916m/z_2.43	454.292	2.43		214	0.99	0.97-0.99	0.2	0.13-0.32
C18_1_CE__NH4	C8-pos	668.6343m/z_11.94	668.634	11.94		1	0.89	0.79-0.94	0.06	0.04-0.08
C4_CARNITINE	HILIC-pos	232.1537m/z_8.17	232.154	8.17	HMDB02013	1	0.98	0.97-0.99	0.08	0.06-0.11
C18_0_LPC	C8-pos	524.3714m/z_5.23	524.371	5.23	HMDB10384	1	0.96	0.92-0.98	0.07	0.05-0.09
C34_1_PC	C8-pos	760.5851m/z_8.55	760.585	8.55	HMDB07972	1		-		-
C34_2_PC_PLASMALOGEN	C8-pos	744.5901m/z_8.84	744.59	8.84	HMDB11210	1	0.92	0.85-0.96	0.09	0.06-0.12
N_ALPHA_ACETYLARGININE	HILIC-pos	217.1291m/z_8.35	217.129	8.35	HMDB04620	2	0.96	0.93-0.98	0.09	0.07-0.13
LINEOYL_ETHANOLAMIDE	HILIC-pos	324.2890m/z_2.03	324.289	2.03	HMDB12252	1	0.94	0.89-0.97	0.21	0.15-0.29
A_KETOGLUTARIC_ACID						0	0.88	0.79-0.94	0.12	0.09-0.17
C20_5_CE__NH4	C8-pos	688.6026m/z_11.23	688.603	11.23		1	0.65	0.45-0.81	0.34	0.26-0.44
C22_5_CE__NH4	C8-pos	716.6336m/z_11.58	716.634	11.58		1	0.97	0.95-0.99	0.06	0.04-0.08
C16_1_LPC_PLASMALOGEN	HILIC-pos	480.3439m/z_7.74	480.344	7.74	HMDB10407	1	0.99	0.99-1	0.06	0.04-0.08
SPHINGOSINE_ISOMER2	HILIC-pos	300.2890m/z_2.42	300.289	2.42		1	0.97	0.95-0.99	0.09	0.07-0.13
C18_0_LPE	C8-pos	482.3246m/z_5.25	482.325	5.25	HMDB11130	1	0.85	0.73-0.93	0.13	0.09-0.18
DMGV	HILIC-pos	202.1183m/z_8.12	202.118	8.12		1	1	.-.	0.01	0-2.5025326E+56
DIMETHYLGLYCINE	HILIC-pos	104.0710m/z_8.75	104.071	8.75	HMDB00092	1	0.96	0.93-0.98	0.07	0.05-0.1
C34_2_PC	C8-pos	758.5692m/z_8.22	758.569	8.22	HMDB07973	1		-		-
C24_0_SM	C8-pos	815.7003m/z_9.78	815.7	9.78	HMDB11697	1	0.9	0.81-0.95	0.09	0.07-0.13
C40_6_PC	C8-pos	834.599m/z_8.66	834.599	8.66	HMDB08057	1	1	1-1	0.03	0-
PUTATIVE_URIDINE_PSEUDOURIDINE_2	HILIC-pos	245.0763m/z_4.38	245.076	4.38		1	0.88	0.77-0.94	0.08	0.06-0.11
C36_0_DAG__NH4	C8-pos	642.6026m/z_9.75	642.603	9.75		1	0.61	0.37-0.81	0.13	0.09-0.17
C18_0_CE	C8-pos	675.6053m/z_12.29	675.605	12.29	HMDB10368	1	0.88	0.78-0.94	0.08	0.06-0.11
C20_4_LPE	C8-pos	502.293m/z_4.58	502.293	4.58	HMDB11517	1	0.96	0.93-0.98	0.09	0.07-0.13
URIC_ACID						0	0.94	0.9-0.97	0.04	0.03-0.06
C32_0_PC	C8-pos	734.5692m/z_8.39	734.569	8.39	HMDB07871	1	1	1-1	0.01	0-
C22_0_SM	C8-pos	787.668m/z_9.37	787.668	9.37	HMDB12103	1	0.94	0.9-0.97	0.07	0.05-0.1
C52_0_TAG__NH4	C8-pos	880.8329m/z_12.48	880.833	12.48		1	1	0.99-1	0.07	0.05-0.09
C20_4_CE__NH4	C8-pos	690.6185m/z_11.5	690.619	11.5		1	0.96	0.92-0.98	0.05	0.04-0.07
RIBOTHYMIDINE	HILIC-pos	259.0919m/z_3.03	259.092	3.03	HMDB00884	1	0.82	0.66-0.91	0.09	0.06-0.13
_2__3__O_METHYLADENOSINE	HILIC-pos	282.1190m/z_4.80	282.119	4.8	HMDB04326	1	0.98	0.95-0.99	0.18	0.13-0.25
ANSERINE	HILIC-pos	241.1289m/z_10.70	241.129	10.7	HMDB00194	347	0.99	0.96-0.99	0.63	0.27-1.48
CHOLINE	HILIC-pos	104.1073m/z_8.46	104.107	8.46	HMDB00097	1	0.95	0.9-0.97	0.04	0.03-0.06
C14_0_LPC	C8-pos	468.3088m/z_4.24	468.309	4.24	HMDB10379	1	0.97	0.94-0.98	0.07	0.05-0.1
C34_3_PC_PLASMALOGEN	C8-pos	742.5747m/z_8.54	742.575	8.54	HMDB11211	1	0.92	0.85-0.96	0.09	0.06-0.12
C52_0_TAG	C8-pos	885.7887m/z_12.48	885.789	12.48	HMDB05365	1	1	0.99-1	0.07	0.05-0.09
C22_0_CERAMIDE__D18_1_	C8-pos	622.6135m/z_9.49	622.614	9.49	HMDB04952	1	0.95	0.9-0.97	0.09	0.07-0.13
C50_6_TAG	C8-pos	845.6627m/z_10.73	845.663	10.73	HMDB10497	1	0.99	0.98-0.99	0.07	0.05-0.1
N_ACETYL_L_GLUTAMIC_ACID						0	0.77	0.59-0.89	0.19	0.14-0.26
C18_2_CE__NH4	C8-pos	666.6184m/z_11.63	666.618	11.63		1	0.85	0.73-0.93	0.06	0.04-0.08
PANTOTHENIC_ACID						0	0.99	0.99-1	0.07	0.05-0.09
C5_1_CARNITINE	HILIC-pos	244.1538m/z_8.04	244.154	8.04	HMDB02366	1	0.99	0.99-1	0.04	0.03-0.05
C38_2_PC	C8-pos	814.632m/z_9.08	814.632	9.08	HMDB08270	1	0.95	0.91-0.98	0.07	0.05-0.1
C5_DC_CARNITINE	HILIC-pos	276.1435m/z_8.50	276.144	8.5	HMDB13130	1	0.98	0.96-0.99	0.06	0.05-0.09
C54_7_TAG__NH4	C8-pos	894.755m/z_11.21	894.755	11.21		1	0.97	0.94-0.98	0.14	0.1-0.19
C16_0_LPC	C8-pos	496.34m/z_4.7	496.34	4.7	HMDB10382	1	0.96	0.93-0.98	0.06	0.04-0.08
C20_3_LPC	C8-pos	518.3219m/z_4.7	518.322	4.7	HMDB10393	1	0.95	0.91-0.97	0.06	0.04-0.08
C30_1_PC	C8-pos	704.5225m/z_7.57	704.523	7.57	HMDB07870	1	1	0.99-1	0.05	0.04-0.07
ALLANTOIN	HILIC-pos	159.0510m/z_3.64	159.051	3.64	HMDB00462	1	0.98	0.96-0.99	0.09	0.07-0.13
C50_0_TAG	C8-pos	857.7572m/z_12.13	857.757	12.13	HMDB05357	1	1	0.99-1	0.04	0.03-0.06
PYROGLUTAMIC_ACID						0	0.77	0.6-0.89	0.14	0.1-0.19
C54_4_TAG	C8-pos	905.7565m/z_11.82	905.756	11.82	HMDB05370	1	0.93	0.87-0.96	0.08	0.06-0.11
C18_1_SM	C8-pos	729.5903m/z_8.12	729.59	8.12	HMDB12101	1	1	1-1	0.01	0-
_6_8_DIHYDROXYPURINE	HILIC-pos	153.0405m/z_4.54	153.041	4.54	HMDB01182	1	0.97	0.95-0.99	0.12	0.09-0.17
C38_5_DAG__NH4	C8-pos	660.5563m/z_8.87	660.556	8.87		1	0.98	0.97-0.99	0.1	0.08-0.14
C18_0_SM	C8-pos	731.6062m/z_8.46	731.606	8.46	HMDB01348	1	1	1-1	0.01	0-
GLUTAMIC_ACID						0	0.32	0.08-0.72	0.6	0.45-0.8
C32_0_PE	C8-pos	692.5227m/z_7.65	692.523	7.65	HMDB08923	8	0.99	0.97-0.99	0.11	0.08-0.15
C50_6_TAG__NH4	C8-pos	840.7076m/z_10.74	840.708	10.74		1	0.99	0.99-1	0.08	0.06-0.12
C48_5_TAG	C8-pos	819.6469m/z_10.58	819.647	10.58		1	1	0.99-1	0.05	0.04-0.08
C52_7_TAG	C8-pos	871.6785m/z_10.85	871.678	10.85	HMDB10517	1	0.97	0.95-0.98	0.11	0.08-0.15
C32_1_PC	C8-pos	732.5536m/z_8.08	732.554	8.08	HMDB07873	1	1	0.99-1	0.04	0.03-0.06
C36_5_PC_PLASMALOGEN_B	C8-pos	766.5736m/z_8.55	766.574	8.55	HMDB11220	1	0.94	0.88-0.97	0.07	0.05-0.1
C9_CARNITINE	HILIC-pos	302.2318m/z_7.39	302.232	7.39	HMDB13288	1	0.96	0.93-0.98	0.12	0.09-0.17
C42_0_TAG	C8-pos	745.6318m/z_10.73	745.632	10.73		3	0.99	0.99-1	0.13	0.09-0.18
C22_6_CE__NH4	C8-pos	714.6181m/z_11.35	714.618	11.35		1	1	1-1	0.03	0-
_1_METHYLHISTAMINE	HILIC-pos	126.1026m/z_9.85	126.103	9.85	HMDB00898	1	0.97	0.94-0.98	0.09	0.07-0.13
_3_METHYLHISTAMINE	HILIC-pos	126.1026m/z_10.02	126.103	10.02	HMDB01861	1	0.93	0.88-0.97	0.19	0.13-0.26
C22_4_CE__NH4	C8-pos	718.6498m/z_11.88	718.65	11.88		4	0.89	0.8-0.94	0.17	0.12-0.23
C10_2_CARNITINE	HILIC-pos	312.2160m/z_7.42	312.216	7.42	HMDB13325	1	0.97	0.94-0.98	0.08	0.06-0.11
C16_0_LPE	C8-pos	454.2933m/z_4.72	454.293	4.72	HMDB11503	1	0.99	0.99-1	0.07	0.05-0.09
C50_5_TAG__NH4	C8-pos	842.723m/z_10.89	842.723	10.89		1	1	1-1	0.04	0.03-0.06
C40_6_PS	C8-pos	836.5384m/z_8.31	836.538	8.31	HMDB10167	1	0.97	0.95-0.99	0.06	0.04-0.08
C38_7_PE_PLASMALOGEN	C8-pos	748.5276m/z_8.49	748.528	8.49	HMDB11420	1	0.82	0.69-0.9	0.2	0.15-0.27
C48_3_TAG__NH4	C8-pos	818.723m/z_11.04	818.723	11.04		1	1	1-1	0.05	0.04-0.07
C50_0_TAG__NH4	C8-pos	852.8023m/z_12.13	852.802	12.13		1	1	1-1	0.05	0.04-0.07
C41_0_TAG__NH4	C8-pos	726.6615m/z_10.55	726.662	10.55		323	1	0.99-1	0.14	0.08-0.23
C54_7_TAG	C8-pos	899.7096m/z_11.2	899.71	11.2	HMDB05447	1	0.93	0.87-0.96	0.11	0.08-0.16
SPERMIDINE	HILIC-pos	146.1650m/z_12.50	146.165	12.5	HMDB01257	1	0.91	0.83-0.95	0.15	0.11-0.2
C48_4_TAG__NH4	C8-pos	816.7076m/z_10.78	816.708	10.78		1	1	1-1	0.04	0.03-0.06
C41_0_TAG	C8-pos	731.6165m/z_10.55	731.616	10.55		156	0.98	0.97-0.99	0.26	0.18-0.39
C46_2_TAG__NH4	C8-pos	792.7075m/z_10.93	792.707	10.93		1	1	1-1	0.03	0.02-0.04
C49_3_TAG__NH4	C8-pos	832.7385m/z_11.21	832.739	11.21		1	0.99	0.99-1	0.07	0.05-0.09
C48_4_TAG	C8-pos	821.6628m/z_10.78	821.663	10.78		1	1	0.99-1	0.04	0.03-0.06
PHENYLALANINE	HILIC-pos	166.0860m/z_6.94	166.086	6.94	HMDB00159	1	0.86	0.74-0.93	0.07	0.05-0.09
C34_3_PC	C8-pos	756.5531m/z_7.93	756.553	7.93	HMDB08006	1	1	1-1	0.01	0-
C20_0_LPE	C8-pos	510.3558m/z_4.96	510.356	4.96		1	0.92	0.86-0.96	0.03	0.02-0.04
C36_5_PC_PLASMALOGEN_A	C8-pos	766.574m/z_8.29	766.574	8.29	HMDB11221	1	0.72	0.54-0.84	0.36	0.27-0.47
_1_METHYLHISTIDINE	HILIC-pos	170.0921m/z_10.03	170.092	10.03	HMDB00001	1	0.89	0.79-0.94	0.2	0.14-0.28
C52_6_TAG__NH4	C8-pos	868.739m/z_11.04	868.739	11.04		1	0.99	0.99-1	0.07	0.05-0.1
C44_1_TAG	C8-pos	771.6472m/z_10.84	771.647	10.84		1	1	0.99-1	0.07	0.05-0.1
C34_0_DAG__NH4	C8-pos	614.5722m/z_9.36	614.572	9.36		1	0.99	0.99-1	0.06	0.05-0.09
C46_1_TAG__NH4	C8-pos	794.723m/z_11.2	794.723	11.2		1	1	1-1	0.03	0.02-0.04
C56_10_TAG	C8-pos	921.6942m/z_10.87	921.694	10.87	HMDB10513	1	0.89	0.79-0.94	0.32	0.23-0.45
_1_METHYLADENOSINE	HILIC-pos	282.1190m/z_7.88	282.119	7.88	HMDB03331	1	0.95	0.91-0.98	0.08	0.06-0.12
C50_5_TAG	C8-pos	847.6781m/z_10.89	847.678	10.89	HMDB10471	1	0.99	0.99-1	0.05	0.03-0.06
C44_2_TAG	C8-pos	769.6315m/z_10.58	769.631	10.58		1	1	0.99-1	0.08	0.06-0.12
C44_0_TAG__NH4	C8-pos	768.7075m/z_11.09	768.707	11.09		3	1	0.99-1	0.1	0.07-0.14
C44_1_TAG__NH4	C8-pos	766.6918m/z_10.84	766.692	10.84		1	1	1-1	0.06	0.04-0.08
XANTHINE	HILIC-pos	153.0404m/z_3.90	153.04	3.9	HMDB00292	1	0.98	0.96-0.99	0.1	0.07-0.14
C47_2_TAG__NH4	C8-pos	806.7231m/z_11.1	806.723	11.1		2	1	1-1	0.06	0.04-0.08
C54_6_TAG__NH4	C8-pos	896.7693m/z_11.45	896.769	11.45		1	0.99	0.99-1	0.05	0.04-0.07
C38_4_DAG_2	C8-pos	662.5713m/z_9.16	662.571	9.16	HMDB07170	2	0.96	0.93-0.98	0.16	0.12-0.23
C16_OH_CARNITINE	HILIC-pos	416.3361m/z_7.28	416.336	7.28	HMDB13337	2	0.96	0.92-0.98	0.15	0.11-0.2
ALDOSTERONE	HILIC-pos	361.2001m/z_2.03	361.2	2.03	HMDB00037	1	0.97	0.95-0.99	0.15	0.11-0.21
C34_5_PC_PLASMALOGEN	C8-pos	738.5431m/z_8.78	738.543	8.78	HMDB11214	2	0.95	0.91-0.98	0.16	0.12-0.22
ACONITIC_ACID						0	0.91	0.83-0.95	0.1	0.07-0.13
C58_10_TAG__NH4	C8-pos	944.7699m/z_11.21	944.77	11.21		1	0.94	0.89-0.97	0.22	0.16-0.31
C38_5_DAG	C8-pos	665.5115m/z_8.88	665.511	8.88	HMDB07199	1	0.99	0.97-0.99	0.07	0.05-0.1
C46_2_TAG	C8-pos	797.6627m/z_10.93	797.663	10.93	HMDB10419	1	1	1-1	0.04	0.03-0.06
C42_0_TAG__NH4	C8-pos	740.6764m/z_10.73	740.676	10.73		30	1	0.99-1	0.12	0.08-0.18
C43_0_TAG__NH4	C8-pos	754.6922m/z_10.9	754.692	10.9		147	1	1-1	0.08	0.05-0.12
C48_3_TAG	C8-pos	823.678m/z_11.03	823.678	11.03	HMDB05432	1	1	0.99-1	0.04	0.03-0.05
C38_7_PC_PLASMALOGEN	C8-pos	790.5738m/z_8.48	790.574	8.48	HMDB11229	1	0.72	0.55-0.85	0.23	0.18-0.31
C58_11_TAG__NH4	C8-pos	942.7558m/z_11.03	942.756	11.03		1	0.95	0.9-0.97	0.43	0.3-0.61
C38_6_PS	C8-pos	808.5077m/z_7.82	808.508	7.82	HMDB12362	8	0.99	0.98-0.99	0.1	0.07-0.14
C48_2_TAG__NH4	C8-pos	820.7387m/z_11.29	820.739	11.29		1	1	1-1	0.03	0.02-0.05
URATE	HILIC-pos	169.0353m/z_4.46	169.035	4.46	HMDB00289	1	0.87	0.76-0.93	0.09	0.06-0.12
C44_0_TAG	C8-pos	773.6627m/z_11.09	773.663	11.09	HMDB42063	1	0.99	0.99-1	0.1	0.07-0.14
C48_5_TAG__NH4	C8-pos	814.6917m/z_10.6	814.692	10.6		2	1	0.99-1	0.06	0.04-0.08
C22_6_LPC	C8-pos	568.3405m/z_4.54	568.341	4.54	HMDB10404	1	1	1-1	0.02	0-4.822885E+238
C22_1_MAG	C8-pos	435.3445m/z_6.69	435.344	6.69	HMDB11582	2	0.55	0.25-0.82	0.09	0.06-0.13
C45_3_TAG	C8-pos	781.6309m/z_10.61	781.631	10.61		21	1	1-1	0.06	0.04-0.09
PUTATIVE_N_ACETYLORNITHINE_2	HILIC-pos	175.1074m/z_7.96	175.107	7.96		265	1	1-1	0.1	0.06-0.16
PHYTOSPHINGOSINE	HILIC-pos	318.2995m/z_6.11	318.3	6.11	HMDB04610	7	0.99	0.98-0.99	0.25	0.17-0.36
C18_3_CE__NH4	C8-pos	664.6025m/z_11.37	664.602	11.37		1	0.97	0.95-0.99	0.04	0.03-0.06
C44_2_TAG__NH4	C8-pos	764.6762m/z_10.58	764.676	10.58		4	1	1-1	0.08	0.06-0.11
C36_3_PC_PLASMALOGEN	C8-pos	770.6059m/z_8.99	770.606	8.99	HMDB11244	1	0.96	0.93-0.98	0.07	0.05-0.09
_5_HYDROXYMETHYL_4_METHYLURACIL	HILIC-pos	157.0606m/z_3.78	157.061	3.78	HMDB00544	2	0.88	0.77-0.94	0.11	0.08-0.15
C46_3_TAG__NH4	C8-pos	790.6917m/z_10.69	790.692	10.69		1	1	1-1	0.05	0.04-0.07
C7_CARNITINE	HILIC-pos	274.2006m/z_7.61	274.201	7.61	HMDB13238	2	0.94	0.89-0.97	0.14	0.1-0.19
C38_3_PC	C8-pos	812.6163m/z_8.86	812.616	8.86	HMDB08047	1	0.98	0.96-0.99	0.06	0.04-0.08
CARNITINE	HILIC-pos	162.1121m/z_9.00	162.112	9	HMDB00062	1	1	1-1	0.01	0-
C48_0_TAG__NH4	C8-pos	824.7703m/z_11.79	824.77	11.79		1	1	1-1	0.04	0.03-0.05
C18_2_LPE	C8-pos	478.2931m/z_4.56	478.293	4.56	HMDB11507	1	0.97	0.95-0.99	0.09	0.06-0.12
C52_7_TAG__NH4	C8-pos	866.7234m/z_10.82	866.723	10.82		1	0.98	0.97-0.99	0.12	0.08-0.16
C46_3_TAG	C8-pos	795.6472m/z_10.69	795.647	10.69		1	1	0.99-1	0.05	0.03-0.07
C36_5_PE_PLASMALOGEN	C8-pos	724.5278m/z_8.56	724.528	8.56	HMDB11410	1	0.94	0.9-0.97	0.11	0.08-0.15
C58_11_TAG	C8-pos	947.7091m/z_11.03	947.709	11.03	HMDB10531	1	0.9	0.82-0.95	0.35	0.25-0.49
ISOLEUCINE	HILIC-pos	132.1018m/z_7.32	132.102	7.32	HMDB00172	1	0.97	0.95-0.99	0.04	0.03-0.06
C20_5_CE	C8-pos	693.5578m/z_11.23	693.558	11.23	HMDB06731	1	0.65	0.45-0.8	0.27	0.21-0.35
C47_1_TAG__NH4	C8-pos	808.739m/z_11.36	808.739	11.36		1	1	1-1	0.03	0.02-0.04
C24_1_SM	C8-pos	813.6848m/z_9.41	813.685	9.41	HMDB12107	1	0.88	0.79-0.94	0.09	0.07-0.13
C48_0_TAG	C8-pos	829.7255m/z_11.79	829.726	11.79	HMDB05356	1	1	1-1	0.03	0.02-0.04
C47_2_TAG	C8-pos	811.6786m/z_11.1	811.679	11.1	HMDB42076	1	1	0.99-1	0.05	0.03-0.07
C50_4_TAG__NH4	C8-pos	844.7384m/z_11.13	844.738	11.13		1	1	0.99-1	0.05	0.04-0.07
C52_1_TAG__NH4	C8-pos	878.8178m/z_12.22	878.818	12.22		1	1	0.99-1	0.07	0.05-0.09
C43_1_TAG	C8-pos	757.6315m/z_10.66	757.631	10.66	HMDB42098	41	0.99	0.99-1	0.12	0.08-0.18
C50_1_TAG__NH4	C8-pos	850.7862m/z_11.88	850.786	11.88		1	1	0.99-1	0.05	0.03-0.07
C18_1_LPE	C8-pos	480.3087m/z_4.88	480.309	4.88	HMDB11506	1	0.98	0.97-0.99	0.08	0.06-0.11
C45_2_TAG	C8-pos	783.647m/z_10.76	783.647	10.76	HMDB43170	6	1	0.99-1	0.06	0.05-0.09
SPHINGANINE	HILIC-pos	302.3045m/z_6.00	302.305	6	HMDB00269	1	0.96	0.93-0.98	0.13	0.09-0.18
OXALOACETIC_ACID						0	0.97	0.95-0.99	0.14	0.1-0.19
C18_2_CARNITINE	HILIC-pos	424.3411m/z_6.84	424.341	6.84	HMDB06469	1	1	1-1	0.01	0-3.0736885E+74
GLYOXYLIC_ACID						1	0.92	0.84-0.96	0.15	0.11-0.2
C16_1_CE__NH4	C8-pos	640.6028m/z_11.55	640.603	11.55		1	1	1-1	0.01	0-
C48_2_TAG	C8-pos	825.6932m/z_11.29	825.693	11.29	HMDB05376	1	1	0.99-1	0.03	0.02-0.04
C46_1_TAG	C8-pos	799.6781m/z_11.18	799.678	11.18	HMDB10412	1	1	1-1	0.03	0.03-0.05
C20_5_LPC	C8-pos	542.3226m/z_4.44	542.323	4.44	HMDB10397	1	0.96	0.92-0.98	0.07	0.05-0.1
CREATINE	HILIC-pos	132.0766m/z_8.52	132.077	8.52	HMDB00064	1	0.99	0.99-1	0.04	0.03-0.05
HYDROXYPROLINE	HILIC-pos	132.0654m/z_8.11	132.065	8.11	HMDB00725	1	0.8	0.63-0.9	0.23	0.17-0.33
C52_6_TAG	C8-pos	873.6937m/z_10.99	873.694	10.99	HMDB05436	1	0.98	0.97-0.99	0.06	0.04-0.09
OLEOYL_LEUCINE						1	0.91	0.83-0.95	0.18	0.13-0.24
KYNURENINE						0	0.96	0.92-0.98	0.06	0.05-0.09
C48_1_TAG__NH4	C8-pos	822.7545m/z_11.55	822.755	11.55		1	1	1-1	0.03	0.02-0.04
C43_0_TAG	C8-pos	759.6472m/z_10.9	759.647	10.9	HMDB42062	29	0.99	0.99-1	0.16	0.11-0.23
PUTATIVE_N_ACETYLORNITHINE_1	HILIC-pos	175.1073m/z_8.40	175.107	8.4		2	0.9	0.82-0.95	0.15	0.11-0.21
C18_1_CARNITINE	HILIC-pos	426.3568m/z_6.77	426.357	6.77	HMDB05065	1	0.99	0.97-0.99	0.05	0.03-0.07
C32_0_DAG__NH4	C8-pos	586.541m/z_8.92	586.541	8.92		1	1	0.99-1	0.07	0.05-0.1
C49_0_TAG__NH4	C8-pos	838.7873m/z_11.94	838.787	11.94		1	0.99	0.99-1	0.1	0.07-0.14
C43_1_TAG__NH4	C8-pos	752.6772m/z_10.65	752.677	10.65		160	1	1-1	0.05	0.03-0.07
C46_0_TAG__NH4	C8-pos	796.7385m/z_11.44	796.739	11.44		1	1	1-1	0.06	0.04-0.08
C49_3_TAG	C8-pos	837.6943m/z_11.2	837.694	11.2	HMDB42103	1	0.99	0.98-1	0.05	0.03-0.06
C49_2_TAG__NH4	C8-pos	834.7544m/z_11.46	834.754	11.46		1	1	0.99-1	0.05	0.04-0.07
TRIMETHYLAMINE_N_OXIDE	HILIC-pos	76.0765m/z_8.28	76.0765	8.28	HMDB00925	1	0.96	0.93-0.98	0.17	0.12-0.23
PUTATIVE_HIPPURATE	HILIC-pos	180.0652m/z_2.62	180.065	2.62		1	1	0.99-1	0.08	0.05-0.11
C56_9_TAG__NH4	C8-pos	918.7545m/z_11.07	918.755	11.07		1	0.94	0.89-0.97	0.25	0.18-0.35
C14_0_CE__NH4	C8-pos	614.587m/z_11.44	614.587	11.44		1	0.91	0.83-0.95	0.12	0.08-0.16
C54_9_TAG	C8-pos	895.6792m/z_10.77	895.679	10.77	HMDB10498	3	0.93	0.87-0.96	0.28	0.2-0.39
C49_1_TAG__NH4	C8-pos	836.7705m/z_11.71	836.77	11.71		1	1	0.99-1	0.05	0.04-0.07
ASPARTATE	HILIC-pos	134.0446m/z_8.19	134.045	8.19	HMDB00191	1	0.92	0.84-0.96	0.1	0.07-0.14
CITRULLINE	HILIC-pos	176.1026m/z_8.56	176.103	8.56	HMDB00904	1	0.97	0.95-0.99	0.05	0.03-0.06
C45_0_TAG__NH4	C8-pos	782.7227m/z_11.26	782.723	11.26		27	1	0.99-1	0.12	0.08-0.17
BETAINE	HILIC-pos	118.0863m/z_9.17	118.086	9.17	HMDB00043	1	0.96	0.92-0.98	0.04	0.03-0.06
IMIDAZOLEACETIC_ACID	HILIC-pos	127.0502m/z_8.26	127.05	8.26	HMDB02024	48	0.99	0.98-0.99	0.21	0.15-0.31
N_CARBAMOYL_BETA_ALANINE	HILIC-pos	133.0607m/z_4.28	133.061	4.28	HMDB00026	1	0.94	0.89-0.97	0.09	0.07-0.13
C50_3_TAG__NH4	C8-pos	846.7541m/z_11.39	846.754	11.39		1	1	1-1	0.03	0.03-0.05
PHOSPHOCHOLINE	HILIC-pos	184.0731m/z_11.50	184.073	11.5	HMDB01565	1	0.89	0.79-0.94	0.3	0.21-0.41
LEUCINE	HILIC-pos	132.1018m/z_7.19	132.102	7.19	HMDB00687	1	0.96	0.92-0.98	0.05	0.04-0.07
C20_4_LPC	C8-pos	544.3404m/z_4.56	544.34	4.56	HMDB10395	1	0.91	0.83-0.95	0.11	0.08-0.15
C12_1_CARNITINE	HILIC-pos	342.2629m/z_7.13	342.263	7.13	HMDB13326	1	0.99	0.98-1	0.05	0.04-0.07
C52_1_TAG	C8-pos	883.7729m/z_12.22	883.773	12.22	HMDB05367	1	0.99	0.98-0.99	0.05	0.04-0.07
C16_0_CERAMIDE__D18_1_	C8-pos	538.5195m/z_8.1	538.519	8.1	HMDB04949	1	0.33	0.1-0.68	0.3	0.24-0.38
C6_CARNITINE	HILIC-pos	260.1851m/z_7.71	260.185	7.71	HMDB00705	1	0.95	0.91-0.98	0.13	0.09-0.18
C46_4_TAG	C8-pos	793.6312m/z_10.44	793.631	10.44		1	1	0.99-1	0.07	0.05-0.09
C47_0_TAG	C8-pos	815.711m/z_11.58	815.711	11.58	HMDB42094	212	0.99	0.98-1	0.11	0.07-0.2
C56_9_TAG	C8-pos	923.7093m/z_11.11	923.709	11.11	HMDB05448	1	0.86	0.75-0.93	0.23	0.17-0.31
C38_3_PE_PLASMALOGEN	C8-pos	756.5913m/z_8.72	756.591	8.72	HMDB11384	1	0.98	0.96-0.99	0.07	0.05-0.1
OROTIC_ACID						0	0.96	0.93-0.98	0.18	0.13-0.26
C56_8_TAG__NH4	C8-pos	920.77m/z_11.35	920.77	11.35		1	0.96	0.92-0.98	0.16	0.11-0.22
TAUROCHOLIC_ACID						0	1	1-1	0.07	0.05-0.09
C50_2_TAG__NH4	C8-pos	848.7703m/z_11.65	848.77	11.65		1	1	0.99-1	0.04	0.03-0.06
C45_1_TAG	C8-pos	785.663m/z_11.01	785.663	11.01	HMDB42099	2	1	0.99-1	0.07	0.05-0.09
C54_1_TAG	C8-pos	911.8044m/z_12.56	911.804	12.56	HMDB05395	1	0.99	0.98-0.99	0.08	0.06-0.12
PYRROLIDONECARBOXYLIC_ACID	HILIC-pos	130.0497m/z_6.96	130.05	6.96	HMDB00805	1	0.92	0.85-0.96	0.19	0.13-0.26
C32_0_DAG	C8-pos	591.4961m/z_8.92	591.496	8.92	HMDB07098	1	0.99	0.99-1	0.07	0.05-0.09
C38_5_PE_PLASMALOGEN	C8-pos	752.5594m/z_9	752.559	9	HMDB11386	1	0.94	0.88-0.97	0.1	0.08-0.14
C43_2_TAG	C8-pos	755.616m/z_10.4	755.616	10.4	HMDB43169	71	0.99	0.99-1	0.13	0.09-0.19
C54_8_TAG	C8-pos	897.6942m/z_10.99	897.694	10.99	HMDB10518	1	0.82	0.68-0.91	0.29	0.21-0.4
C54_1_TAG__NH4	C8-pos	906.8488m/z_12.56	906.849	12.56		1	1	0.99-1	0.07	0.05-0.1
C34_2_PE_PLASMALOGEN	C8-pos	702.5436m/z_8.85	702.544	8.85	HMDB08952	1	0.92	0.85-0.96	0.14	0.1-0.19
METHIONINE_SULFOXIDE	HILIC-pos	166.0530m/z_8.85	166.053	8.85	HMDB02005	2	1	1-1	0.09	0.06-0.13
C50_4_TAG	C8-pos	849.6935m/z_11.13	849.693	11.13	HMDB05435	1	0.98	0.97-0.99	0.05	0.04-0.07
C52_5_TAG__NH4	C8-pos	870.754m/z_11.23	870.754	11.23		1	0.99	0.99-1	0.06	0.05-0.09
C46_0_TAG	C8-pos	801.6941m/z_11.43	801.694	11.43	HMDB10411	1	1	1-1	0.04	0.03-0.06
VALINE	HILIC-pos	118.0864m/z_7.63	118.086	7.63	HMDB00883	1	0.95	0.9-0.97	0.05	0.04-0.07
C36_2_PS_PLASMALOGEN	C8-pos	774.5642m/z_7.6	774.564	7.6		1	0.95	0.9-0.97	0.08	0.06-0.11
C54_6_TAG	C8-pos	901.7248m/z_11.44	901.725	11.44	HMDB05391	1	1	1-1	0.01	0-
N_LAUROYLGLYCINE	HILIC-pos	258.2059m/z_2.41	258.206	2.41	HMDB13272	3	0.93	0.87-0.96	0.14	0.1-0.19
C3_CARNITINE	HILIC-pos	218.1381m/z_8.49	218.138	8.49	HMDB00824	1	0.94	0.89-0.97	0.1	0.07-0.13
PC_SOURCE_FRAGMENT	HILIC-pos	496.3384m/z_0.36	496.338	0.36		1	0	.-.	0.41	0.39-0.44
C48_1_TAG	C8-pos	827.7095m/z_11.55	827.71	11.55	HMDB05359	1	1	1-1	0.02	0.02-0.03
LACTIC_ACID						0	0.88	0.78-0.94	0.06	0.05-0.09
C54_3_TAG	C8-pos	907.7727m/z_12.08	907.773	12.08	HMDB05405	1	0.96	0.93-0.98	0.05	0.03-0.06
NIACINAMIDE	HILIC-pos	123.0554m/z_3.88	123.055	3.88	HMDB01406	1	1	1-1	0.08	0.05-0.11
C45_1_TAG__NH4	C8-pos	780.7074m/z_11.01	780.707	11.01		28	1	0.99-1	0.08	0.06-0.12
C32_1_DAG__NH4	C8-pos	584.5253m/z_8.61	584.525	8.61		1	1	1-1	0.04	0.03-0.06
C8_CARNITINE	HILIC-pos	288.2161m/z_7.52	288.216	7.52	HMDB00791	1	0.83	0.7-0.91	0.33	0.25-0.45
C36_1_PE	C8-pos	746.5708m/z_8.99	746.571	8.99	HMDB08993	1	0.97	0.94-0.98	0.13	0.09-0.18
C49_0_TAG	C8-pos	843.7416m/z_11.93	843.742	11.93	HMDB42095	119	0.98	0.96-0.99	0.19	0.13-0.28
METHYLTHIOADENOSINE	HILIC-pos	298.0962m/z_4.41	298.096	4.41	HMDB01173	56	0.97	0.93-0.98	0.29	0.2-0.42
C38_6_PE_PLASMALOGEN	C8-pos	750.5434m/z_8.68	750.543	8.68	HMDB11387	1	0.98	0.96-0.99	0.06	0.04-0.08
C54_5_TAG	C8-pos	903.7406m/z_11.69	903.741	11.69	HMDB05385	1	1	1-1	0.02	0-
C26_CARNITINE	HILIC-pos	540.4978m/z_6.45	540.498	6.45	HMDB06347	1	1	1-1	0.01	0-1.0748436E+44
C34_3_DAG__NH4	C8-pos	608.5252m/z_8.43	608.525	8.43		1	1	1-1	0.04	0.03-0.05
GLYCERIC_ACID						0	0.97	0.94-0.98	0.06	0.05-0.09
C51_0_TAG__NH4	C8-pos	860.7741m/z_12.13	860.774	12.13		41	0.97	0.93-0.98	0.25	0.18-0.36
_5_MTHF						2	0.59	0.29-0.83	0.49	0.34-0.7
C36_1_DAG__NH4	C8-pos	640.5878m/z_9.49	640.588	9.49		1	0.99	0.99-1	0.08	0.06-0.11
C46_4_TAG__NH4	C8-pos	788.6755m/z_10.44	788.676	10.44		11	1	0.99-1	0.1	0.07-0.14
_2_AMINOADIPIC_ACID						1	0.92	0.85-0.96	0.16	0.11-0.22
C36_0_DAG	C8-pos	647.5585m/z_9.75	647.558	9.75	HMDB07158	1	0.43	0.19-0.71	0.09	0.07-0.11
C47_1_TAG	C8-pos	813.6945m/z_11.36	813.694	11.36	HMDB42100	1	1	1-1	0.04	0.03-0.05
C14_0_CE	C8-pos	619.5423m/z_11.45	619.542	11.45	HMDB06725	1	0.93	0.87-0.97	0.09	0.06-0.12
C53_2_TAG__NH4	C8-pos	890.8175m/z_12.13	890.817	12.13		1	0.99	0.99-1	0.06	0.04-0.08
SEROTONIN	HILIC-pos	177.1020m/z_6.49	177.102	6.49	HMDB00259	1	0.95	0.9-0.97	0.13	0.1-0.18
C58_10_TAG	C8-pos	949.7247m/z_11.2	949.725	11.2	HMDB05476	1	0.92	0.86-0.96	0.18	0.13-0.25
C45_2_TAG__NH4	C8-pos	778.6926m/z_10.75	778.693	10.75		66	1	1-1	0.07	0.05-0.1
C54_8_TAG__NH4	C8-pos	892.7396m/z_10.96	892.74	10.96		1	0.96	0.93-0.98	0.17	0.13-0.24
C49_1_TAG	C8-pos	841.7264m/z_11.7	841.726	11.7	HMDB11705	1	0.99	0.98-0.99	0.08	0.06-0.11
THIAMINE	HILIC-pos	265.1111m/z_9.86	265.111	9.86	HMDB00235	1	0.99	0.99-1	0.06	0.05-0.09
C50_3_TAG	C8-pos	851.7089m/z_11.39	851.709	11.39	HMDB05433	1	0.99	0.98-0.99	0.03	0.02-0.05
C36_1_DAG	C8-pos	645.5429m/z_9.47	645.543	9.47	HMDB07216	1	0.99	0.98-1	0.08	0.06-0.11
C56_4_TAG	C8-pos	933.7884m/z_12.16	933.788	12.16	HMDB05398	1	0.91	0.84-0.96	0.11	0.08-0.15
FUMARIC_ACID						0	0.78	0.61-0.89	0.16	0.12-0.22
C60_12_TAG	C8-pos	973.7246m/z_11.18	973.725	11.18	HMDB05478	1	0.95	0.9-0.97	0.4	0.28-0.56
C18_1_LPC_PLASMALOGEN	HILIC-pos	508.3752m/z_7.95	508.375	7.95	HMDB13122	1	1	1-1	0.05	0.04-0.07
METHIONINE	HILIC-pos	150.0580m/z_7.26	150.058	7.26	HMDB00696	1	0.93	0.86-0.96	0.06	0.04-0.08
C4_OH_CARNITINE	HILIC-pos	248.1487m/z_9.03	248.149	9.03	HMDB13127	5	0.97	0.95-0.99	0.15	0.11-0.21
ACETYLGLYCINE	HILIC-pos	118.0500m/z_4.76	118.05	4.76	HMDB00532	3	0.99	0.98-0.99	0.12	0.09-0.17
HIPPURIC_ACID						1	0.98	0.96-0.99	0.17	0.12-0.23
C32_2_DAG__NH4	C8-pos	582.5095m/z_8.3	582.51	8.3		86	0.99	0.99-1	0.11	0.08-0.16
CORTISOL	HILIC-pos	363.2157m/z_2.03	363.216	2.03	HMDB00063	1	0.96	0.93-0.98	0.08	0.06-0.11
C53_3_TAG__NH4	C8-pos	888.8016m/z_11.9	888.802	11.9		1	0.97	0.94-0.98	0.08	0.06-0.12
ORNITHINE	HILIC-pos	133.0970m/z_9.46	133.097	9.46	HMDB00214	1	1	1-1	0.01	0-1.091688E+121
C50_1_TAG	C8-pos	855.741m/z_11.88	855.741	11.88	HMDB05360	1	0.99	0.98-0.99	0.05	0.04-0.07
C32_1_DAG	C8-pos	589.4805m/z_8.61	589.481	8.61	HMDB07099	1	1	1-1	0.03	0.02-0.04
C53_2_TAG	C8-pos	895.773m/z_12.14	895.773	12.14	HMDB42196	1	0.99	0.97-0.99	0.05	0.03-0.06
C18_1_LPC	C8-pos	522.3557m/z_4.86	522.356	4.86	HMDB02815	1	0.96	0.92-0.98	0.06	0.05-0.09
C50_2_TAG	C8-pos	853.7251m/z_11.65	853.725	11.65	HMDB05377	1	0.99	0.99-1	0.04	0.03-0.06
_2_AMINOOCTANOIC_ACID	HILIC-pos	160.1329m/z_6.65	160.133	6.65	HMDB00991	1	0.95	0.9-0.97	0.14	0.1-0.2
_1_METHYLNICOTINAMIDE	HILIC-pos	137.0707m/z_8.41	137.071	8.41	HMDB00699	1	1	1-1	0.03	0.02-0.04
PUTATIVE_URIDINE_PSEUDOURIDINE_1	HILIC-pos	245.0763m/z_3.21	245.076	3.21		1	0.82	0.68-0.91	0.14	0.1-0.18
C36_2_PE_PLASMALOGEN	C8-pos	730.5749m/z_9.28	730.575	9.28	HMDB09082	1	0.96	0.92-0.98	0.1	0.07-0.13
C49_2_TAG	C8-pos	839.71m/z_11.45	839.71	11.45	HMDB11706	1	0.99	0.98-0.99	0.06	0.04-0.08
C55_3_TAG__NH4	C8-pos	916.8328m/z_12.23	916.833	12.23		1	0.99	0.98-0.99	0.08	0.06-0.11
XANTHOSINE	HILIC-pos	285.0790m/z_4.47	285.079	4.47	HMDB00299		0	.-.	1.03	0.94-1.14
C10_CARNITINE	HILIC-pos	316.2474m/z_7.29	316.247	7.29	HMDB00651	1	0.94	0.88-0.97	0.18	0.13-0.25
PSEUDOURIDINE						1	0.9	0.82-0.95	0.06	0.05-0.09
GLYCOCHOLIC_ACID						0	0.99	0.99-1	0.11	0.08-0.16
C40_7_PE_PLASMALOGEN	C8-pos	776.5587m/z_8.93	776.559	8.93	HMDB11394	1	0.8	0.65-0.89	0.19	0.14-0.25
GUANIDOACETIC_ACID	HILIC-pos	118.0613m/z_8.06	118.061	8.06	HMDB00128	1	1	.-.	0.01	0-2461.71
C56_1_TAG__NH4	C8-pos	934.881m/z_12.94	934.881	12.94		30	1	1-1	0.09	0.06-0.14
C38_5_PE	C8-pos	766.5394m/z_8.4	766.539	8.4	HMDB09069	1	0.95	0.91-0.98	0.09	0.07-0.13
OLEOYL_GLYCINE						0	1	1-1	0.07	0.03-0.14
C14_1_CARNITINE	HILIC-pos	370.2942m/z_6.97	370.294	6.97	HMDB02014	1	0.99	0.98-1	0.05	0.04-0.07
C18_1_OH_CARNITINE	HILIC-pos	442.3519m/z_7.20	442.352	7.2	HMDB13339	11	0.99	0.98-1	0.09	0.06-0.12
THYROXINE	HILIC-pos	777.6917m/z_5.88	777.692	5.88	HMDB00248	1	0.75	0.55-0.88	0.13	0.1-0.19
C38_4_PE	C8-pos	768.5546m/z_8.72	768.555	8.72	HMDB09003	1	0.82	0.67-0.91	0.2	0.14-0.27
PROLINE	HILIC-pos	116.0707m/z_8.32	116.071	8.32	HMDB00162	1	0.97	0.94-0.98	0.05	0.04-0.07
C18_2_LPC	C8-pos	520.3401m/z_4.54	520.34	4.54	HMDB10386	1	0.93	0.87-0.96	0.11	0.08-0.14
C18_0_MAG	C8-pos	381.2975m/z_5.64	381.298	5.64	HMDB11131	1	1	1-1	0.04	0-
C56_7_TAG__NH4	C8-pos	922.7853m/z_11.58	922.785	11.58		1	0.98	0.97-0.99	0.07	0.05-0.09
ADENOSINE	HILIC-pos	268.1034m/z_5.22	268.103	5.22	HMDB00050	1	0.85	0.72-0.93	0.37	0.26-0.52
C58_9_TAG__NH4	C8-pos	946.7849m/z_11.45	946.785	11.45		1	0.92	0.84-0.96	0.22	0.16-0.3
C34_1_DAG__NH4	C8-pos	612.5564m/z_9.05	612.556	9.05		1	0.99	0.98-0.99	0.08	0.06-0.11
ACETOACETIC_ACID						1	0.99	0.98-1	0.09	0.06-0.12
PUTATIVE_SPHINGOSINE	HILIC-pos	300.2890m/z_5.99	300.289	5.99		1	0.99	0.98-1	0.15	0.1-0.21
C20_3_CE__NH4	C8-pos	692.6341m/z_11.76	692.634	11.76		1	0.95	0.92-0.98	0.06	0.04-0.08
C55_2_TAG__NH4	C8-pos	918.8502m/z_12.48	918.85	12.48		1	0.99	0.99-1	0.1	0.07-0.14
SUCCINIC_ACID_METHYLMALONIC_ACID						0	0.91	0.83-0.95	0.09	0.06-0.12
C38_6_PC_PLASMALOGEN	C8-pos	792.5888m/z_8.67	792.589	8.67	HMDB11319	1	0.94	0.88-0.97	0.08	0.06-0.11
INDOLE_3_LACTIC_ACID						0	0.94	0.89-0.97	0.12	0.09-0.16
C22_5_CE	C8-pos	721.5892m/z_11.58	721.589	11.58	HMDB10375	2	0.97	0.94-0.98	0.07	0.05-0.1
C52_4_TAG	C8-pos	877.7242m/z_11.47	877.724	11.47	HMDB05363	1	0.97	0.95-0.99	0.05	0.03-0.07
N_ACETYL_L_ALANINE						1	0.85	0.73-0.93	0.08	0.06-0.11
AMINOISOBUTYRIC_ACID	HILIC-pos	104.0710m/z_7.85	104.071	7.85	HMDB01906	1	0.98	0.96-0.99	0.04	0.03-0.06
C16_1_LPC	C8-pos	494.3243m/z_4.38	494.324	4.38	HMDB10383	1	1	1-1	0.01	0-8.730603E+158
C52_2_TAG__NH4	C8-pos	876.8019m/z_11.98	876.802	11.98		1	0.98	0.97-0.99	0.07	0.05-0.1
C14_2_CARNITINE	HILIC-pos	368.2786m/z_7.03	368.279	7.03	HMDB13331	1	0.98	0.96-0.99	0.09	0.07-0.13
THREONINE	HILIC-pos	120.0656m/z_7.84	120.066	7.84	HMDB00167	1	0.97	0.95-0.99	0.04	0.03-0.05
TAURINE	HILIC-pos	126.0219m/z_6.34	126.022	6.34	HMDB00251	1	1	1-1	0.01	0-2.052592E+256
C55_2_TAG	C8-pos	923.8047m/z_12.48	923.805	12.48	HMDB42226	1	1	0.99-1	0.04	0.03-0.06
_3_HYDROXYANTHRANILIC_ACID	HILIC-pos	154.0496m/z_1.84	154.05	1.84	HMDB01476	4	0.25	0.08-0.58	1.26	1.01-1.56
C44_13_PE_PLASMALOGEN	C8-pos	820.5253m/z_8.04	820.525	8.04		10	0.81	0.69-0.89	0.32	0.25-0.42
C34_2_DAG__NH4	C8-pos	610.5405m/z_8.75	610.54	8.75		1	0.98	0.97-0.99	0.09	0.07-0.13
C56_8_TAG	C8-pos	925.7244m/z_11.34	925.724	11.34	HMDB05392	1	0.91	0.83-0.95	0.14	0.1-0.2
TYROSINE	HILIC-pos	182.0809m/z_7.05	182.081	7.05	HMDB00158	1	0.96	0.92-0.98	0.05	0.03-0.06
C36_3_PC	C8-pos	784.5851m/z_8.4	784.585	8.4	HMDB08105	1		-		-
C38_4_PC_PLASMALOGEN	C8-pos	796.6222m/z_9.03	796.622	9.03	HMDB11252	1	0.9	0.82-0.95	0.08	0.06-0.11
BETA_ALANINE	HILIC-pos	90.0556m/z_8.19	90.0556	8.19	HMDB00056	1	0.87	0.76-0.93	0.09	0.06-0.12
C34_3_DAG	C8-pos	613.4804m/z_8.45	613.48	8.45	HMDB07132	1	0.99	0.99-1	0.05	0.04-0.07
C24_1_CERAMIDE__D18_1_	C8-pos	648.6292m/z_9.54	648.629	9.54	HMDB04953	1	0.92	0.86-0.96	0.1	0.08-0.14
C34_1_PC_PLASMALOGEN_B	C8-pos	746.6057m/z_9.14	746.606	9.14	HMDB11239	1	0.81	0.66-0.91	0.16	0.11-0.22
_3_HYDROXYBUTYRIC_ACID						0	1	1-1	0.06	0.04-0.09
C56_6_TAG__NH4	C8-pos	924.801m/z_11.8	924.801	11.8		1	0.97	0.94-0.98	0.08	0.06-0.11
C45_0_TAG	C8-pos	787.6791m/z_11.26	787.679	11.26	HMDB42093	32	0.99	0.99-1	0.12	0.08-0.17
C53_3_TAG	C8-pos	893.7568m/z_11.9	893.757	11.9	HMDB42105	1	0.96	0.92-0.98	0.08	0.05-0.1
C22_6_CE	C8-pos	719.5733m/z_11.35	719.573	11.35	HMDB06733	1	0.93	0.86-0.96	0.13	0.09-0.17
GLN_SOURCE_FRAGMENT	HILIC-pos	130.0497m/z_8.25	130.05	8.25		1	0.97	0.94-0.98	0.04	0.03-0.06
CARNOSINE	HILIC-pos	227.1133m/z_9.53	227.113	9.53	HMDB00033	28	1	1-1	0.02	0.02-0.04
C32_2_DAG	C8-pos	587.4648m/z_8.3	587.465	8.3	HMDB07128	5	1	0.99-1	0.06	0.04-0.08
C56_1_TAG	C8-pos	939.8367m/z_12.94	939.837	12.94	HMDB05396	1	1	1-1	0.05	0.04-0.07
SERINE	HILIC-pos	106.0502m/z_7.89	106.05	7.89	HMDB00187	1	0.9	0.82-0.95	0.06	0.05-0.08
INDOLE_3_CARBOXYLIC_ACID						1	0.84	0.7-0.92	0.19	0.13-0.26
GLYCOCHENODEOXYCHOLIC_ACID						0	1	1-1	0.03	0.02-0.04
UROCANIC_ACID	HILIC-pos	139.0500m/z_4.67	139.05	4.67	HMDB00301	1	0.99	0.98-1	0.26	0.18-0.39
C36_4_DAG__NH4	C8-pos	634.5397m/z_8.76	634.54	8.76		120	0.99	0.98-1	0.13	0.09-0.19
INDOLE_3_PROPANOIC_ACID						0	0.98	0.96-0.99	0.14	0.1-0.19
C36_2_PE	C8-pos	744.5548m/z_8.7	744.555	8.7	HMDB08994	1	0.88	0.78-0.94	0.19	0.14-0.27
GLUTAMINE	HILIC-pos	147.0761m/z_8.25	147.076	8.25	HMDB00641	1	0.96	0.93-0.98	0.05	0.03-0.06
C30_0_DAG	C8-pos	563.4652m/z_8.46	563.465	8.46	HMDB07011	30	0.99	0.99-1	0.09	0.06-0.12
C38_6_PE	C8-pos	764.522m/z_8.2	764.522	8.2	HMDB09102	1	0.97	0.95-0.99	0.13	0.1-0.18
C58_7_TAG	C8-pos	955.7722m/z_11.81	955.772	11.81	HMDB05471	1	0.96	0.93-0.98	0.07	0.05-0.1
C2_CARNITINE	HILIC-pos	204.1226m/z_8.84	204.123	8.84	HMDB00201	1	0.99	0.98-1	0.03	0.02-0.04
_3_DEHYDROXYCARNITINE	HILIC-pos	146.1172m/z_8.93	146.117	8.93	HMDB06831	1	1	1-1	0.01	0-3.086582E+231
_1_5_AG___1_DEOXYGLUCOSE						5	0.81	0.65-0.9	0.17	0.12-0.24
C56_3_TAG	C8-pos	935.8041m/z_12.4	935.804	12.4	HMDB05410	1	0.98	0.96-0.99	0.08	0.06-0.12
ADMA	HILIC-pos	203.1498m/z_9.93	203.15	9.93	HMDB01539	1	0.61	0.38-0.8	0.1	0.07-0.13
SPHINGOSINE	C8-pos	300.2902m/z_4.85	300.29	4.85	HMDB00252	1	0.86	0.74-0.93	0.11	0.08-0.16
C34_1_DAG	C8-pos	617.5116m/z_9.05	617.512	9.05	HMDB07102	1	0.99	0.97-0.99	0.08	0.06-0.11
C58_6_TAG	C8-pos	957.7882m/z_12.05	957.788	12.05	HMDB05458	1	0.98	0.97-0.99	0.04	0.03-0.06
HISTIDINE	HILIC-pos	156.0765m/z_9.54	156.077	9.54	HMDB00177	1	0.93	0.87-0.97	0.09	0.06-0.12
C36_2_DAG__NH4	C8-pos	638.572m/z_9.18	638.572	9.18		1	0.99	0.98-0.99	0.08	0.06-0.11
C54_4_TAG__NH4	C8-pos	900.8015m/z_11.83	900.802	11.83		1	0.94	0.89-0.97	0.13	0.1-0.18
C36_4_PE	C8-pos	740.5235m/z_8.26	740.524	8.26	HMDB08937	1	0.93	0.87-0.96	0.17	0.12-0.23
C58_6_TAG__NH4	C8-pos	952.8326m/z_12.05	952.833	12.05		1	0.98	0.97-0.99	0.08	0.06-0.11
C36_3_DAG__NH4	C8-pos	636.5562m/z_8.88	636.556	8.88		1	0.96	0.92-0.98	0.14	0.1-0.19
INDOXYL_SULFATE						0	0.99	0.99-1	0.06	0.04-0.08
ALPHA_GLYCEROPHOSPHOCHOLINE	HILIC-pos	258.1095m/z_10.63	258.11	10.63	HMDB00086	1	1	1-1	0.02	0.01-0.03
C60_12_TAG__NH4	C8-pos	968.7734m/z_11.18	968.773	11.18		1	0.98	0.97-0.99	0.27	0.19-0.39
XANTHURENIC_ACID						0	0.96	0.92-0.98	0.1	0.07-0.13
C12_CARNITINE	HILIC-pos	344.2786m/z_7.11	344.279	7.11	HMDB02250	1	0.98	0.96-0.99	0.08	0.06-0.12
KYNURENIC_ACID	HILIC-pos	190.0495m/z_5.45	190.049	5.45	HMDB00715	1	0.8	0.62-0.9	0.28	0.2-0.4
C55_3_TAG	C8-pos	921.7892m/z_12.23	921.789	12.23	HMDB42466	1	0.97	0.94-0.98	0.06	0.05-0.09
C36_3_PS_PLASMALOGEN	C8-pos	772.5485m/z_7.64	772.548	7.64		1	0.99	0.98-0.99	0.09	0.06-0.12
PTERIN	HILIC-pos	164.0564m/z_4.97	164.056	4.97	HMDB00802	3	1	1-1	0.08	0-3148283300000
C52_2_TAG	C8-pos	881.757m/z_11.99	881.757	11.99	HMDB05369	1	0.95	0.91-0.98	0.04	0.03-0.06
C20_4_CARNITINE	HILIC-pos	448.3412m/z_6.72	448.341	6.72		36	1	1-1	0.17	0-2.4660483E+61
C52_3_TAG	C8-pos	879.741m/z_11.73	879.741	11.73	HMDB05384	1	0.84	0.7-0.92	0.05	0.04-0.07
C52_3_TAG__NH4	C8-pos	874.7852m/z_11.73	874.785	11.73		1	0.97	0.94-0.98	0.09	0.06-0.12
_1_2_4_TRIMETHYLBENZENE	HILIC-pos	121.1013m/z_1.76	121.101	1.76	HMDB13733	1	0.97	0.94-0.98	0.07	0.05-0.1
TAURODEOXYCHOLIC_ACID___TAUROCHE						0	1	1-1	0.07	0.05-0.1
ATP						11	0.94	0.89-0.97	0.14	0.1-0.19
C22_4_CE	C8-pos	723.6049m/z_11.88	723.605	11.88	HMDB06729	19	0.95	0.9-0.97	0.17	0.12-0.23
C56_5_TAG__NH4	C8-pos	926.817m/z_12.04	926.817	12.04		1	0.96	0.92-0.98	0.09	0.07-0.13
C54_2_TAG__NH4	C8-pos	904.8338m/z_12.31	904.834	12.31		1	0.99	0.99-1	0.07	0.05-0.1
PUTRESCINE	HILIC-pos	89.1079m/z_9.56	89.1079	9.56	HMDB01414	1	0.95	0.9-0.97	0.11	0.08-0.15
GABA	HILIC-pos	104.0710m/z_7.86	104.071	7.86	HMDB00112	1	0.61	0.32-0.83	0.33	0.23-0.47
GLUCOSE_FRUCTOSE_GALACTOSE_WATER						0	0.71	0.5-0.86	0.13	0.09-0.17
INOSINE	HILIC-pos	269.0874m/z_5.09	269.087	5.09	HMDB00195	1	1	1-1	0	0-5.214402E+275
C34_3_PE_PLASMALOGEN	C8-pos	700.5269m/z_8.55	700.527	8.55	HMDB11343	1	0.94	0.88-0.97	0.14	0.1-0.19
C56_4_TAG__NH4	C8-pos	928.8371m/z_12.15	928.837	12.15		1	0.95	0.9-0.97	0.12	0.08-0.16
C58_8_TAG__NH4	C8-pos	948.8014m/z_11.7	948.801	11.7		1	0.95	0.9-0.97	0.14	0.1-0.19
PUTATIVE_1_METHYLGUANOSINE	HILIC-pos	298.1139m/z_5.29	298.114	5.29	HMDB01563	1	0	.-.	0.23	0.22-0.25
URIDINE						0	0.68	0.47-0.84	0.2	0.15-0.27
C36_1_PC_PLASMALOGEN	C8-pos	774.6363m/z_9.29	774.636	9.29	HMDB11241	1	0.95	0.9-0.97	0.08	0.05-0.1
PHOSPHOCREATINE						0	0.5	0.32-0.68	0.31	0.25-0.37
C36_1_PE_PLASMALOGEN	C8-pos	732.5902m/z_8.88	732.59	8.88	HMDB09016	2	0.77	0.59-0.89	0.26	0.19-0.36
BILIRUBIN	HILIC-pos	585.2692m/z_1.75	585.269	1.75	HMDB00054	1	0.82	0.67-0.91	0.19	0.13-0.26
PIPECOLIC_ACID	HILIC-pos	130.0861m/z_8.19	130.086	8.19	HMDB00716	1	0.55	0.32-0.76	0.89	0.67-1.17
GLYCINE	HILIC-pos	76.0401m/z_8.15	76.0401	8.15	HMDB00123	1	0.81	0.66-0.91	0.11	0.08-0.15
C36_3_PE	C8-pos	742.5371m/z_8.39	742.537	8.39	HMDB09060	1	0.95	0.9-0.97	0.17	0.12-0.23
ASPARAGINE	HILIC-pos	133.0606m/z_8.15	133.061	8.15	HMDB00168	1	0.88	0.78-0.94	0.1	0.07-0.13
C56_5_TAG	C8-pos	931.7722m/z_12.04	931.772	12.04	HMDB05406	1	1	1-1	0.01	0-
C36_4_PE_PLASMALOGEN	C8-pos	726.5435m/z_8.67	726.543	8.67	HMDB11442	1	0.96	0.91-0.98	0.12	0.08-0.16
OLEOYL_SERINE						0	0.91	0.83-0.95	0.11	0.08-0.15
C54_3_TAG__NH4	C8-pos	902.8177m/z_12.07	902.818	12.07		1	0.98	0.96-0.99	0.1	0.07-0.13
GLUTATHIONE_REDUCED						0	0.72	0.54-0.85	0.61	0.45-0.82
DEOXYCHOLIC_ACID						0	0.94	0.89-0.97	0.25	0.19-0.35
C36_2_DAG	C8-pos	643.5273m/z_9.18	643.527	9.18	HMDB07218	1	0.98	0.96-0.99	0.08	0.06-0.11
C16_1_CE	C8-pos	645.558m/z_11.55	645.558	11.55	HMDB00658	1	1	1-1	0.01	0-
C18_1_CE	C8-pos	673.5894m/z_11.94	673.589	11.94	HMDB00918	1	0.93	0.86-0.96	0.05	0.04-0.07
C40_7_PC_PLASMALOGEN	C8-pos	818.6043m/z_8.91	818.604	8.91	HMDB11294	1	0.83	0.7-0.92	0.11	0.08-0.15
C56_2_TAG__NH4	C8-pos	932.8648m/z_12.66	932.865	12.66		1	1	1-1	0.06	0.04-0.08
C30_0_DAG__NH4	C8-pos	558.5103m/z_8.47	558.51	8.47		96	0.98	0.97-0.99	0.2	0.14-0.28
C34_1_PC_PLASMALOGEN_A	C8-pos	746.6056m/z_8.84	746.606	8.84	HMDB11208	1	0.92	0.85-0.96	0.08	0.05-0.1
MYRISTOLEIC_ACID	HILIC-pos	227.2001m/z_1.69	227.2	1.69	HMDB02000	1	0.98	0.97-0.99	0.06	0.04-0.08
C20_CARNITINE	HILIC-pos	456.4038m/z_6.65	456.404	6.65	HMDB06460	1	0.98	0.95-0.99	0.07	0.05-0.1
TRYPTOPHAN	HILIC-pos	205.0967m/z_6.73	205.097	6.73	HMDB00929	1	0.95	0.9-0.97	0.05	0.04-0.08
C34_0_DAG	C8-pos	621.5448m/z_9.18	621.545	9.18	HMDB07100	4	0.98	0.96-0.99	0.14	0.1-0.2
C16_CARNITINE	HILIC-pos	400.3413m/z_6.86	400.341	6.86	HMDB00222	1	0.96	0.93-0.98	0.06	0.04-0.08
C20_4_CE	C8-pos	695.5735m/z_11.5	695.573	11.5	HMDB06726	1	0.97	0.94-0.98	0.05	0.03-0.06
PUTATIVE_2_METHYLGUANOSINE	HILIC-pos	298.1140m/z_5.48	298.114	5.48	HMDB05862	1	0.83	0.7-0.92	0.18	0.13-0.24
HISTAMINE	HILIC-pos	112.0872m/z_9.50	112.087	9.5	HMDB00870	1	0.98	0.96-0.99	0.1	0.08-0.14
ASPARTIC_ACID						0	0.63	0.39-0.82	0.39	0.29-0.53
P_METHYLHIPPURIC_ACID	HILIC-pos	194.0809m/z_2.77	194.081	2.77	HMDB13292	6	0.23	0.01-0.85	1.3	0.91-1.86
C16_1_MAG	C8-pos	339.2509m/z_4.78	339.251	4.78	HMDB11565	1	0.8	0.64-0.9	0.09	0.06-0.12
N_ACETYLPUTRESCINE	HILIC-pos	131.1178m/z_8.10	131.118	8.1	HMDB02064	1	0.91	0.84-0.96	0.09	0.07-0.13
C16_0_CE	C8-pos	647.5739m/z_11.86	647.574	11.86	HMDB00885	1	0.84	0.7-0.92	0.06	0.04-0.08
ACETYLCHOLINE	HILIC-pos	146.1173m/z_7.96	146.117	7.96	HMDB00895	4	0.99	0.99-1	0.11	0.08-0.16
CITRIC_ACID_ISOCITRIC_ACID						1	0.86	0.73-0.93	0.23	0.17-0.33
ALANINE	HILIC-pos	90.0555m/z_8.02	90.0555	8.02	HMDB00161	1	0.79	0.64-0.89	0.1	0.07-0.13
_2_KETOISOVALERIC_ACID_KIV						1	0.87	0.76-0.93	0.07	0.05-0.09
LYSINE	HILIC-pos	147.1124m/z_9.57	147.112	9.57	HMDB00182	1	0.92	0.85-0.96	0.06	0.04-0.08
C38_4_DAG_1	C8-pos	669.5429m/z_9.29	669.543	9.29	HMDB07170	1	0.94	0.89-0.97	0.18	0.13-0.24
C36_3_PE_PLASMALOGEN	C8-pos	728.5644m/z_9	728.564	9	HMDB11441	1	0.95	0.9-0.97	0.1	0.08-0.15
D_GLUCONIC_ACID						1	0.72	0.5-0.87	0.23	0.16-0.33
C42_11_PE_PLASMALOGEN	C8-pos	796.5251m/z_8.63	796.525	8.63		7	0.78	0.62-0.88	0.38	0.28-0.52
C56_7_TAG	C8-pos	927.7406m/z_11.56	927.741	11.56	HMDB05462	1	1	1-1	0.01	0-
C18_2_SM	C8-pos	749.5565m/z_7.8	749.557	7.8		1	1	1-1	0.01	0-2.021397E+66
GUANINE	HILIC-pos	152.0564m/z_5.50	152.056	5.5	HMDB00132	1	1	0.99-1	0.06	0.04-0.08
ACETAMINOPHEN	HILIC-pos	152.0704m/z_2.04	152.07	2.04	HMDB01859	2	0.99	0.97-0.99	0.52	0.32-0.84
_2_HYDROXYBUTYRIC_ACID						0	0.99	0.99-1	0.04	0.03-0.05
C18_CARNITINE	HILIC-pos	428.3729m/z_6.74	428.373	6.74	HMDB00848	1	0.95	0.91-0.98	0.09	0.07-0.13
ARACHINDONOYL_PHENYLALANINE						0	0.93	0.87-0.97	0.22	0.16-0.31
C36_2_PC_PLASMALOGEN	C8-pos	772.6213m/z_9	772.621	9	HMDB11243	1	0.95	0.9-0.97	0.07	0.05-0.1
PUTATIVE_3_AMINOISOBUTYRIC_ACID	HILIC-pos	104.0710m/z_7.95	104.071	7.95		1	1	1-1	0.05	0-
COTININE	HILIC-pos	177.1019m/z_5.22	177.102	5.22	HMDB01046	2	1	1-1	0.06	0-
C56_6_TAG	C8-pos	929.7563m/z_11.8	929.756	11.8	HMDB05456	1	1	1-1	0.01	0-
C36_4_DAG	C8-pos	639.4958m/z_8.59	639.496	8.59	HMDB07248	1	0.89	0.81-0.95	0.21	0.15-0.29
C34_2_PE	C8-pos	716.5215m/z_8.24	716.521	8.24	HMDB08928	3	0.89	0.79-0.94	0.27	0.19-0.37
_3_AMINOISOBUTYRIC_ACID						1	0.89	0.8-0.94	0.23	0.17-0.31
C56_2_TAG	C8-pos	937.8186m/z_12.66	937.819	12.66	HMDB05404	1	1	0.99-1	0.04	0.03-0.06
C58_8_TAG	C8-pos	953.7572m/z_11.69	953.757	11.69	HMDB05413	1	0.85	0.73-0.93	0.25	0.18-0.34
C34_2_DAG	C8-pos	615.4961m/z_8.76	615.496	8.76	HMDB07103	1	0.98	0.95-0.99	0.09	0.07-0.13
C36_3_DAG	C8-pos	641.5116m/z_8.88	641.512	8.88	HMDB07219	1	0.93	0.87-0.97	0.13	0.1-0.19
C54_2_TAG	C8-pos	909.7884m/z_12.32	909.788	12.32	HMDB05403	1	0.98	0.96-0.99	0.06	0.04-0.08
C47_0_TAG__NH4	C8-pos	810.7544m/z_11.6	810.754	11.6		6	1	1-1	0.07	0.05-0.1
C40_6_PE	C8-pos	792.5528m/z_8.66	792.553	8.66	HMDB09012	34	0.99	0.98-1	0.1	0.07-0.14
C18_3_CE	C8-pos	669.5578m/z_11.37	669.558	11.37	HMDB10370	1	0.98	0.96-0.99	0.04	0.03-0.05
C56_3_TAG__NH4	C8-pos	930.8491m/z_12.4	930.849	12.4		1	0.99	0.98-0.99	0.1	0.07-0.14
SPHINGOSINE_ISOMER3	HILIC-pos	300.2888m/z_6.26	300.289	6.26		2	0.99	0.98-0.99	0.26	0.18-0.38
CYTOSINE	HILIC-pos	112.0508m/z_6.41	112.051	6.41	HMDB00630	1	0.76	0.58-0.88	0.58	0.41-0.81
SDMA	HILIC-pos	203.1498m/z_9.83	203.15	9.83	HMDB03334	1	0.86	0.75-0.93	0.07	0.05-0.1
C18_2_CE	C8-pos	671.5734m/z_11.63	671.573	11.63	HMDB00610	1	0.89	0.8-0.95	0.05	0.04-0.07
HOMOCYSTEINE	HILIC-pos	136.0425m/z_7.43	136.042	7.43	HMDB00742	10	0.45	0.28-0.63	0.82	0.68-1
S_ADENOSYLMETHIONINE	HILIC-pos	399.1437m/z_10.34	399.144	10.34	HMDB01185	1	0.86	0.73-0.93	0.14	0.1-0.19
N_ACETYLTRYPTOPHAN	HILIC-pos	247.1072m/z_2.96	247.107	2.96	HMDB13713	1	1	1-1	0.06	0.04-0.1
GUANOSINE	HILIC-pos	284.0983m/z_5.49	284.098	5.49	HMDB00133	1	0.99	0.99-1	0.07	0.05-0.1
ARGININE	HILIC-pos	175.1186m/z_9.33	175.119	9.33	HMDB00517	1	0.96	0.92-0.98	0.04	0.03-0.05
C34_4_PC_PLASMALOGEN	C8-pos	740.5565m/z_8.46	740.557	8.46	HMDB11212	4	0.78	0.6-0.9	0.24	0.17-0.34
PROLINE_BETAINE	HILIC-pos	144.1016m/z_9.42	144.102	9.42	HMDB04827	1	1	1-1	0.04	0.03-0.05
C14_CARNITINE	HILIC-pos	372.3100m/z_6.97	372.31	6.97	HMDB05066	1	0.98	0.97-0.99	0.06	0.04-0.08
HYDROXYPHENYLPYRUVIC_ACID						0	1	0.99-1	0.08	0.05-0.11
C18_0_MAG__NH4	C8-pos	376.3423m/z_5.64	376.342	5.64		1	1	.-.	0.06	0-5.626039E+162
_5_HYDROXYTRYPTOPHAN	HILIC-pos	221.0916m/z_6.74	221.092	6.74	HMDB00472	1	0	.-.	1.85	1.58-2.17
N_ACETYL_L_GLUTAMINE						1	0.97	0.94-0.98	0.12	0.09-0.17
PHENYLACETYLGLYCINE	HILIC-pos	194.0810m/z_2.88	194.081	2.88	HMDB00821	6	0.52	0.22-0.81	0.84	0.59-1.21
UDP_GLCNAC						0	0.95	0.91-0.98	0.34	0.24-0.48
OLEOYL_PHENYLALANINE						0	0.86	0.74-0.93	0.28	0.2-0.39
C20_3_CE	C8-pos	697.5893m/z_11.77	697.589	11.77	HMDB06736	1	0.97	0.94-0.98	0.06	0.05-0.09
C58_9_TAG	C8-pos	951.7411m/z_11.45	951.741	11.45	HMDB05463	1	0.85	0.73-0.92	0.23	0.17-0.32
NMMA	HILIC-pos	189.1342m/z_9.54	189.134	9.54	HMDB29416	1	0.91	0.84-0.95	0.06	0.04-0.08

## Sheet: Models 1 and 2
	Model 1			Model 2
Metabolite	OR	95% CI	P-value	OR	95% CI	P-value	P rank	Q-value
C38_4_PI	0.35	0.2058-0.606	0.000158219	0.32	0.1762-0.582	0.000187032	1	0.0969078
C3_DC_CH3_CARNITINE	2.83	1.7305-4.6388	3.47003e-05	2.61	1.5267-4.4692	0.00045802	2	0.0969078
C16_1_SM	0.4	0.2309-0.7077	0.00152331	0.34	0.187-0.6299	0.000556941	3	0.0969078
C14_0_SM	0.45	0.2737-0.7345	0.0014465	0.4	0.2358-0.6831	0.000766508	4	0.100029
C5_CARNITINE	2.88	1.7389-4.7644	3.93009e-05	2.31	1.3609-3.9282	0.00193739	5	0.193992
C34_0_PC	0.43	0.2608-0.7158	0.00112187	0.43	0.255-0.7416	0.0022298	6	0.193992
C3_DC_CARNITINE	2.61	1.5451-4.3976	0.000330099	2.35	1.344-4.1	0.00270794	7	0.201935
C36_0_PC	0.46	0.2781-0.7607	0.00247907	0.46	0.2708-0.7837	0.00424911	8	0.247196
C22_1_SM	0.4	0.2312-0.6878	0.000946016	0.44	0.2472-0.7707	0.004262	9	0.247196
C36_1_PS_PLASMALOGEN	0.5	0.3044-0.8221	0.00627993	0.47	0.2734-0.8007	0.00559065	10	0.291832
URACIL	1.94	1.2151-3.1064	0.00554333	1.92	1.1828-3.1283	0.00837133	11	0.326676
GLUTAMATE	3.26	1.7481-6.0632	0.000198825	2.48	1.2528-4.8942	0.00909492	12	0.326676
C36_4_PC_B	0.5	0.3067-0.8161	0.00554206	0.51	0.2997-0.8652	0.0125778	13	0.326676
CYCLIC_AMP	0.51	0.2799-0.9416	0.0312091	0.43	0.2186-0.8367	0.0131103	14	0.326676
MALIC_ACID	1.7	1.0683-2.696	0.0251063	1.84	1.1295-3.0033	0.0143587	15	0.326676
_3_METHOXYTYRAMINE	1.67	1.1515-2.4346	0.00696469	1.64	1.1015-2.4327	0.0147645	16	0.326676
C34_4_PC	0.5	0.2945-0.8419	0.00926852	0.49	0.2759-0.8694	0.0147692	17	0.326676
C20_0_SM	0.49	0.2991-0.8028	0.00462124	0.52	0.3111-0.8828	0.0151581	18	0.326676
C18_0_CE__NH4	0.61	0.3807-0.9875	0.0442569	0.53	0.319-0.8854	0.0152053	19	0.326676
C36_0_PE	0.52	0.3156-0.856	0.0101497	0.52	0.3076-0.8889	0.0166204	20	0.326676
C34_0_PS	0.48	0.2871-0.8131	0.00616053	0.5	0.2847-0.8829	0.0167784	21	0.326676
N6_ACETYLLYSINE	1.88	1.1747-3.0035	0.00847649	1.83	1.0993-3.0425	0.0200984	22	0.326676
C22_1_MAG__NH4	0.49	0.2569-0.9429	0.0325654	0.42	0.2057-0.8764	0.020511	23	0.326676
C22_6_LPE	0.44	0.2642-0.7469	0.00220772	0.53	0.3054-0.9067	0.0207261	24	0.326676
C40_9_PC	0.44	0.2521-0.7667	0.00377665	0.5	0.2777-0.8996	0.0207291	25	0.326676
C38_6_PC	0.43	0.2452-0.7657	0.00399045	0.49	0.2696-0.8975	0.0207592	26	0.326676
C30_0_PC	0.57	0.3439-0.9484	0.0303985	0.53	0.3066-0.9118	0.0219098	27	0.326676
SPHINGOSINE_ISOMER1	0.67	0.4269-1.0453	0.0773767	0.55	0.3344-0.9195	0.0222933	28	0.326676
C22_0_LPE	0.42	0.2475-0.7149	0.0013717	0.52	0.2923-0.9101	0.0223018	29	0.326676
C32_2_PC	0.55	0.3282-0.9232	0.0236385	0.52	0.2969-0.9116	0.0224111	30	0.326676
C40_10_PC	0.43	0.2592-0.7265	0.00149862	0.53	0.3058-0.9172	0.0233076	31	0.326676
PUTATIVE_URIDINE_PSEUDOURIDINE_3	3.91	1.5576-9.8112	0.00368601	3.04	1.1579-7.9589	0.0239333	32	0.326676
C24_0_CERAMIDE__D18_1_	0.58	0.3669-0.9314	0.0238755	0.56	0.3427-0.9285	0.0243283	33	0.326676
C38_4_PC	0.59	0.3577-0.9659	0.0360022	0.54	0.3115-0.9235	0.0246279	34	0.326676
C16_0_SM	0.5	0.2996-0.8218	0.00647587	0.54	0.3181-0.9249	0.024648	35	0.326676
HYPOXANTHINE	1.8	1.0881-2.9654	0.0220189	1.84	1.0802-3.1475	0.0249215	36	0.326676
S_ADENOSYL_L_HOMOCYSTEINE	1.94	1.1561-3.2488	0.0120663	1.65	1.0638-2.5604	0.0253507	37	0.326676
CREATININE	2.09	1.2399-3.5313	0.00568709	1.89	1.0805-3.3013	0.0256362	38	0.326676
N_ACETYL_L_ASPARTIC_ACID	1.66	1.0091-2.7175	0.0459441	1.81	1.0733-3.0631	0.0261083	39	0.326676
C36_2_PC	0.64	0.3972-1.0344	0.0685158	0.56	0.3332-0.9386	0.0278105	40	0.326676
QUINOLINIC_ACID	2.07	1.3297-3.22	0.00126815	1.7	1.0568-2.7335	0.0286834	41	0.326676
_2_HYDROXYGLUTARIC_ACID	1.45	0.9403-2.2435	0.0924761	1.65	1.0537-2.5984	0.0287363	42	0.326676
C36_1_PC	0.66	0.414-1.0406	0.0733385	0.57	0.3434-0.9433	0.0287777	43	0.326676
C34_0_PE	0.57	0.3417-0.9416	0.0283206	0.55	0.3213-0.9419	0.029384	44	0.326676
_21_DEOXYCORTISOL	0.6	0.4094-0.8886	0.0105415	0.63	0.4163-0.9554	0.0296059	45	0.326676
C38_2_PE	0.5	0.3081-0.8229	0.00618654	0.56	0.335-0.9447	0.0296365	46	0.326676
ECTOINE	1.58	1.0084-2.4607	0.0458605	1.73	1.0533-2.8563	0.0304743	47	0.326676
PYRUVIC_ACID	1.87	1.1479-3.0621	0.0120403	1.8	1.055-3.081	0.0310831	48	0.326676
C16_0_CE__NH4	0.49	0.2866-0.8245	0.00745407	0.54	0.3081-0.946	0.0312302	49	0.326676
LPE_SOURCE_FRAGMENT	1.72	1.088-2.7177	0.0202678	1.72	1.0502-2.8331	0.0312908	50	0.326676
C18_1_CE__NH4	0.49	0.2914-0.8129	0.00592875	0.55	0.3172-0.9521	0.032748	51	0.333312
C4_CARNITINE	1.89	1.2154-2.9499	0.00476817	1.67	1.0417-2.6799	0.0332035	52	0.333312
C18_0_LPC	0.52	0.3042-0.9023	0.0197601	0.54	0.3017-0.9551	0.0343169	53	0.337989
C34_1_PC	0.57	0.3503-0.9228	0.0223075	0.57	0.3384-0.9632	0.0356853	54	0.339176
C34_2_PC_PLASMALOGEN	0.46	0.2773-0.7739	0.00329482	0.55	0.3165-0.9612	0.0357484	55	0.339176
N_ALPHA_ACETYLARGININE	1.62	1.0174-2.5653	0.0420593	1.7	1.0333-2.7813	0.0366527	56	0.339176
LINEOYL_ETHANOLAMIDE	0.59	0.3673-0.9581	0.0327721	0.58	0.3426-0.9673	0.0370364	57	0.339176
A_KETOGLUTARIC_ACID	1.79	1.1741-2.7402	0.00688818	1.59	1.025-2.474	0.0384543	58	0.346088
C20_5_CE__NH4	0.58	0.3531-0.938	0.0266301	0.57	0.3368-0.9735	0.0394707	59	0.347477
C22_5_CE__NH4	0.5	0.3067-0.826	0.00660242	0.57	0.3388-0.9749	0.0399398	60	0.347477
C16_1_LPC_PLASMALOGEN	0.51	0.3004-0.8574	0.0112376	0.56	0.3232-0.9791	0.0418647	61	0.358252
SPHINGOSINE_ISOMER2	0.7	0.4366-1.1192	0.135982	0.58	0.346-0.9826	0.0427633	62	0.36004
C18_0_LPE	0.53	0.3259-0.861	0.0103591	0.59	0.3552-0.9854	0.0437466	63	0.362472
DMGV	2.09	1.3223-3.2973	0.00158516	1.68	1.011-2.7901	0.0452458	64	0.364125
DIMETHYLGLYCINE	2.04	1.2139-3.4206	0.00707293	1.76	1.0118-3.078	0.0453412	65	0.364125
C34_2_PC	0.59	0.3574-0.9814	0.0420468	0.58	0.3391-0.996	0.048312	66	0.378024
C24_0_SM	0.54	0.3335-0.8858	0.0144148	0.59	0.3523-0.9973	0.0488012	67	0.378024
C40_6_PC	0.59	0.3494-1.0012	0.0505315	0.57	0.32-0.9981	0.0492445	68	0.378024
PUTATIVE_URIDINE_PSEUDOURIDINE_2	6.23	1.7083-22.7086	0.00558317	4.05	0.9971-16.4166	0.0504788	69	0.381883
C36_0_DAG__NH4	0.79	0.5295-1.1877	0.26046	0.63	0.3908-1.0036	0.0517534	70	0.385932
C18_0_CE	0.66	0.4142-1.037	0.0710751	0.62	0.3827-1.0068	0.0533154	71	0.391981
C20_4_LPE	0.52	0.3121-0.8594	0.0108842	0.6	0.3527-1.0174	0.0579511	72	0.417474
URIC_ACID	1.75	1.1056-2.7722	0.0169427	1.54	0.9849-2.3978	0.0583823	73	0.417474
C32_0_PC	0.56	0.34-0.916	0.0210498	0.6	0.3548-1.0256	0.0619665	74	0.425501
C22_0_SM	0.58	0.353-0.9496	0.030384	0.61	0.3607-1.0253	0.0620013	75	0.425501
C52_0_TAG__NH4	0.86	0.5374-1.3776	0.531366	0.6	0.3451-1.0277	0.0626035	76	0.425501
C20_4_CE__NH4	0.58	0.353-0.9405	0.0274143	0.61	0.3566-1.0271	0.0627655	77	0.425501
RIBOTHYMIDINE	0.67	0.4304-1.0456	0.0778912	0.63	0.3835-1.0285	0.0645646	78	0.432086
_2__3__O_METHYLADENOSINE	2.17	1.1617-4.0708	0.0151567	1.88	0.9581-3.6704	0.0664921	79	0.439353
ANSERINE	1.65	1.0542-2.5938	0.0285297	1.56	0.9673-2.5033	0.068318	80	0.445763
CHOLINE	2.03	1.1756-3.4954	0.0110212	1.73	0.9561-3.1364	0.0699868	81	0.445763
C14_0_LPC	0.66	0.413-1.0634	0.0881585	0.63	0.3765-1.0391	0.0700241	82	0.445763
C34_3_PC_PLASMALOGEN	0.55	0.3428-0.8818	0.0130616	0.63	0.3813-1.0473	0.0749803	83	0.467169
C52_0_TAG	0.92	0.5664-1.4804	0.719421	0.6	0.3452-1.0545	0.0761085	84	0.467169
C22_0_CERAMIDE__D18_1_	0.72	0.4538-1.146	0.166522	0.63	0.3795-1.0506	0.0767129	85	0.467169
C50_6_TAG	0.74	0.4713-1.1728	0.202471	0.63	0.3769-1.0514	0.0769666	86	0.467169
N_ACETYL_L_GLUTAMIC_ACID	1.52	0.9677-2.3801	0.0692164	1.52	0.9529-2.432	0.0786858	87	0.470966
C18_2_CE__NH4	0.56	0.3408-0.921	0.0223413	0.63	0.3725-1.0573	0.080034	88	0.470966
PANTOTHENIC_ACID	1.43	0.9257-2.2146	0.106732	1.53	0.9498-2.4524	0.0806293	89	0.470966
C5_1_CARNITINE	1.69	1.0566-2.697	0.0285092	1.55	0.9468-2.5522	0.081201	90	0.470966
C38_2_PC	0.67	0.4215-1.0801	0.101215	0.64	0.387-1.0596	0.0828042	91	0.474987
C5_DC_CARNITINE	1.57	0.997-2.4744	0.0515462	1.52	0.9446-2.4309	0.0847869	92	0.47522
C54_7_TAG__NH4	0.75	0.4846-1.1761	0.213984	0.65	0.3955-1.063	0.0858376	93	0.47522
C16_0_LPC	0.56	0.3436-0.924	0.0230175	0.63	0.3743-1.0677	0.0863524	94	0.47522
C20_3_LPC	0.56	0.3422-0.9231	0.0228349	0.63	0.3744-1.0709	0.088313	95	0.47522
C30_1_PC	0.72	0.4521-1.1537	0.173268	0.64	0.3818-1.0699	0.0885585	96	0.47522
ALLANTOIN	1.68	0.9826-2.8623	0.0580197	1.64	0.9276-2.8997	0.0888596	97	0.47522
C50_0_TAG	0.94	0.5905-1.5035	0.802934	0.63	0.3641-1.0757	0.0899169	98	0.47522
PYROGLUTAMIC_ACID	1.34	0.8668-2.087	0.186128	1.45	0.9432-2.2393	0.0901279	99	0.47522
C54_4_TAG	1.57	0.9406-2.6142	0.0844727	1.58	0.9181-2.7296	0.0983852	100	0.498833
C18_1_SM	0.68	0.422-1.1006	0.116829	0.65	0.3914-1.0846	0.0994189	101	0.498833
_6_8_DIHYDROXYPURINE	1.63	1.0897-2.4445	0.0174629	1.44	0.9336-2.2095	0.0994399	102	0.498833
C38_5_DAG__NH4	0.8	0.5189-1.2378	0.318167	0.67	0.4095-1.0831	0.101324	103	0.498833
C18_0_SM	0.68	0.4244-1.1004	0.117306	0.65	0.3897-1.0879	0.101353	104	0.498833
GLUTAMIC_ACID	2.23	1.2665-3.9273	0.00546317	1.66	0.903-3.0496	0.102782	105	0.498833
C32_0_PE	0.7	0.4544-1.0788	0.106072	0.68	0.43-1.0805	0.102972	106	0.498833
C50_6_TAG__NH4	0.79	0.5168-1.1994	0.26554	0.67	0.4161-1.084	0.103159	107	0.498833
C48_5_TAG	0.79	0.5043-1.2442	0.311722	0.66	0.3942-1.0895	0.103207	108	0.498833
C52_7_TAG	0.74	0.4757-1.1453	0.175452	0.67	0.4113-1.0911	0.107505	109	0.507801
C32_1_PC	0.73	0.4543-1.1805	0.200958	0.65	0.3845-1.0988	0.107765	110	0.507801
C36_5_PC_PLASMALOGEN_B	0.66	0.4155-1.0626	0.0879089	0.66	0.4013-1.0945	0.107981	111	0.507801
C9_CARNITINE	1.71	1.0356-2.8155	0.0359912	1.55	0.9061-2.6668	0.109156	112	0.508745
C42_0_TAG	0.89	0.5709-1.3849	0.603246	0.67	0.4089-1.0971	0.111425	113	0.510451
C22_6_CE__NH4	0.6	0.3554-0.9995	0.0497917	0.64	0.3702-1.1139	0.114994	114	0.510451
_1_METHYLHISTAMINE	1.38	0.8873-2.1557	0.152099	1.48	0.9092-2.3991	0.115159	115	0.510451
_3_METHYLHISTAMINE	1.49	0.9396-2.3481	0.0904008	1.48	0.9072-2.4297	0.115837	116	0.510451
C22_4_CE__NH4	0.63	0.4163-0.9616	0.0320894	0.71	0.4566-1.0904	0.116341	117	0.510451
C10_2_CARNITINE	1.56	0.9719-2.5158	0.0654077	1.49	0.9034-2.4672	0.117868	118	0.510451
C16_0_LPE	0.54	0.3278-0.8771	0.013053	0.66	0.3941-1.1126	0.119458	119	0.510451
C50_5_TAG__NH4	0.81	0.5212-1.2543	0.342811	0.68	0.4144-1.1081	0.120916	120	0.510451
C40_6_PS	0.71	0.4445-1.1373	0.154722	0.67	0.4055-1.1115	0.121344	121	0.510451
C38_7_PE_PLASMALOGEN	0.67	0.3901-1.1664	0.158806	0.63	0.347-1.1344	0.122897	122	0.510451
C48_3_TAG__NH4	0.86	0.5419-1.3532	0.506478	0.67	0.3989-1.1165	0.123479	123	0.510451
C50_0_TAG__NH4	0.96	0.603-1.5374	0.874059	0.65	0.3808-1.1244	0.12466	124	0.510451
C41_0_TAG__NH4	0.85	0.5606-1.2872	0.441767	0.7	0.448-1.1042	0.126183	125	0.510451
C54_7_TAG	0.75	0.4763-1.1823	0.215732	0.68	0.4109-1.1176	0.127429	126	0.510451
SPERMIDINE	0.64	0.362-1.1325	0.125466	0.62	0.3343-1.1476	0.127918	127	0.510451
C48_4_TAG__NH4	0.83	0.5327-1.3083	0.431022	0.68	0.4088-1.1207	0.129237	128	0.510451
C41_0_TAG	0.85	0.5265-1.3811	0.517157	0.66	0.3911-1.1298	0.131315	129	0.510451
C46_2_TAG__NH4	0.89	0.5698-1.3975	0.618714	0.68	0.4097-1.1244	0.132349	130	0.510451
C49_3_TAG__NH4	0.86	0.5539-1.3506	0.523367	0.68	0.4155-1.1254	0.134881	131	0.510451
C48_4_TAG	0.84	0.5314-1.3224	0.448146	0.68	0.4066-1.1295	0.135488	132	0.510451
PHENYLALANINE	1.71	1.0667-2.7394	0.0258533	1.47	0.8843-2.4557	0.136738	133	0.510451
C34_3_PC	0.61	0.3736-1.007	0.0533078	0.67	0.3958-1.1372	0.138182	134	0.510451
C20_0_LPE	0.53	0.3168-0.8992	0.0183137	0.66	0.3765-1.1452	0.138298	135	0.510451
C36_5_PC_PLASMALOGEN_A	0.7	0.4256-1.1557	0.163855	0.66	0.382-1.1432	0.138513	136	0.510451
_1_METHYLHISTIDINE	1.57	0.9937-2.4722	0.0532537	1.45	0.8866-2.374	0.138598	137	0.510451
C52_6_TAG__NH4	0.78	0.5025-1.2238	0.284282	0.69	0.4216-1.1299	0.140361	138	0.510451
C44_1_TAG	0.91	0.5776-1.4404	0.692994	0.68	0.4088-1.1356	0.141034	139	0.510451
C34_0_DAG__NH4	0.97	0.6182-1.5203	0.892527	0.68	0.4006-1.1426	0.143942	140	0.510451
C46_1_TAG__NH4	0.92	0.5776-1.4708	0.732319	0.67	0.3977-1.1446	0.144477	141	0.510451
C56_10_TAG	0.69	0.4401-1.0756	0.100953	0.7	0.4324-1.1314	0.145167	142	0.510451
_1_METHYLADENOSINE	2.02	1.2111-3.3811	0.00711512	1.5	0.8682-2.6085	0.145274	143	0.510451
C50_5_TAG	0.82	0.5272-1.2716	0.373374	0.69	0.4247-1.1347	0.145387	144	0.510451
C44_2_TAG	0.9	0.5667-1.417	0.639035	0.68	0.4103-1.1421	0.14672	145	0.510451
C44_0_TAG__NH4	0.93	0.6044-1.4292	0.738727	0.7	0.4333-1.1332	0.147	146	0.510451
C44_1_TAG__NH4	0.92	0.59-1.4317	0.708946	0.69	0.423-1.1382	0.147824	147	0.510451
XANTHINE	1.51	0.9854-2.3261	0.0583987	1.41	0.8852-2.2397	0.148426	148	0.510451
C47_2_TAG__NH4	0.91	0.5977-1.3817	0.654611	0.71	0.4439-1.1312	0.148921	149	0.510451
C54_6_TAG__NH4	0.83	0.5401-1.2815	0.403881	0.7	0.4296-1.1372	0.149188	150	0.510451
C38_4_DAG_2	0.79	0.513-1.2191	0.287853	0.7	0.437-1.1344	0.149374	151	0.510451
C16_OH_CARNITINE	1.39	0.9034-2.1364	0.134253	1.42	0.8815-2.2719	0.150482	152	0.510451
ALDOSTERONE	0.78	0.5731-1.0542	0.105133	0.78	0.559-1.0957	0.153409	153	0.510451
C34_5_PC_PLASMALOGEN	0.79	0.509-1.2407	0.311943	0.7	0.4356-1.1409	0.154667	154	0.510451
ACONITIC_ACID	1.19	0.7612-1.8472	0.451082	1.43	0.8728-2.3487	0.155277	155	0.510451
C58_10_TAG__NH4	0.73	0.4547-1.1686	0.189198	0.69	0.408-1.1538	0.155443	156	0.510451
C38_5_DAG	0.83	0.5368-1.2938	0.416676	0.7	0.429-1.1456	0.156291	157	0.510451
C46_2_TAG	0.92	0.5831-1.44	0.704822	0.69	0.4179-1.1529	0.158464	158	0.510451
C42_0_TAG__NH4	0.91	0.5796-1.4407	0.697816	0.69	0.4175-1.1533	0.158579	159	0.510451
C43_0_TAG__NH4	0.86	0.5422-1.3736	0.53429	0.69	0.4174-1.1535	0.158739	160	0.510451
C48_3_TAG	0.89	0.566-1.4101	0.628354	0.69	0.4145-1.1565	0.160178	161	0.510451
C38_7_PC_PLASMALOGEN	0.62	0.3597-1.0685	0.0851564	0.66	0.3686-1.1803	0.161034	162	0.510451
C58_11_TAG__NH4	0.72	0.4508-1.1355	0.155374	0.69	0.4094-1.16	0.161091	163	0.510451
C38_6_PS	0.76	0.493-1.1865	0.231411	0.71	0.4419-1.1456	0.161274	164	0.510451
C48_2_TAG__NH4	0.92	0.5878-1.454	0.733998	0.69	0.4144-1.158	0.161349	165	0.510451
URATE	1.92	1.1616-3.1759	0.0109698	1.5	0.8492-2.6358	0.163222	166	0.513263
C44_0_TAG	0.94	0.6012-1.4755	0.793773	0.7	0.4257-1.1584	0.16632	167	0.519175
C48_5_TAG__NH4	0.85	0.5611-1.2893	0.445547	0.72	0.4498-1.1483	0.167091	168	0.519175
C22_6_LPC	0.56	0.3367-0.9282	0.0245635	0.68	0.3974-1.1771	0.17025	169	0.52139
C22_1_MAG	0.63	0.3356-1.1841	0.151372	0.62	0.3055-1.2387	0.173661	170	0.52139
C45_3_TAG	0.91	0.6131-1.3581	0.651634	0.74	0.4732-1.1447	0.17375	171	0.52139
PUTATIVE_N_ACETYLORNITHINE_2	1.3	0.8364-2.0208	0.243598	1.38	0.8654-2.2082	0.175382	172	0.52139
PHYTOSPHINGOSINE	0.57	0.3174-1.0135	0.0555403	0.66	0.3549-1.212	0.178172	173	0.52139
C18_3_CE__NH4	0.73	0.4406-1.1941	0.206725	0.69	0.4037-1.1837	0.178543	174	0.52139
C44_2_TAG__NH4	0.93	0.6144-1.422	0.752466	0.73	0.455-1.1583	0.179077	175	0.52139
C36_3_PC_PLASMALOGEN	0.61	0.3795-0.9653	0.0350029	0.71	0.4304-1.1743	0.182721	176	0.52139
_5_HYDROXYMETHYL_4_METHYLURACIL	2.63	1.0287-6.7076	0.0434699	1.93	0.7342-5.0514	0.182873	177	0.52139
C46_3_TAG__NH4	0.91	0.5838-1.4079	0.662399	0.72	0.4381-1.1724	0.184627	178	0.52139
C7_CARNITINE	1.53	0.9773-2.3954	0.0629507	1.39	0.854-2.2639	0.185003	179	0.52139
C38_3_PC	0.91	0.5742-1.4295	0.671328	0.71	0.4301-1.178	0.185971	180	0.52139
CARNITINE	1.71	1.0564-2.7658	0.0289947	1.42	0.8434-2.4035	0.186039	181	0.52139
C48_0_TAG__NH4	1	0.6247-1.5938	0.992863	0.7	0.4068-1.1925	0.187419	182	0.52139
C18_2_LPE	0.65	0.3946-1.0544	0.0803157	0.71	0.4246-1.1826	0.187426	183	0.52139
C52_7_TAG__NH4	0.81	0.5294-1.2342	0.324375	0.73	0.4532-1.1685	0.188377	184	0.52139
C46_3_TAG	0.9	0.5706-1.4176	0.647743	0.71	0.428-1.1834	0.189913	185	0.52139
C36_5_PE_PLASMALOGEN	0.85	0.5302-1.3763	0.51732	0.7	0.4177-1.1894	0.19009	186	0.52139
C58_11_TAG	0.71	0.4443-1.1235	0.142083	0.71	0.4309-1.1823	0.190356	187	0.52139
ISOLEUCINE	1.82	1.1162-2.982	0.0164554	1.44	0.8323-2.5052	0.191186	188	0.52139
C20_5_CE	0.63	0.3851-1.033	0.0670855	0.7	0.4136-1.1931	0.191317	189	0.52139
C47_1_TAG__NH4	0.96	0.6225-1.4786	0.850988	0.72	0.4468-1.1764	0.192879	190	0.52139
C24_1_SM	0.59	0.3442-0.9996	0.049823	0.68	0.3868-1.2116	0.193248	191	0.52139
C48_0_TAG	1	0.6277-1.5961	0.996709	0.7	0.4149-1.1948	0.193514	192	0.52139
C47_2_TAG	0.93	0.5952-1.454	0.75109	0.72	0.4386-1.1818	0.193802	193	0.52139
C50_4_TAG__NH4	0.87	0.5532-1.3624	0.538482	0.72	0.4344-1.1842	0.193928	194	0.52139
C52_1_TAG__NH4	1.03	0.6539-1.6358	0.885626	0.7	0.4107-1.1988	0.194772	195	0.52139
C43_1_TAG	0.94	0.6539-1.3378	0.714189	0.77	0.5132-1.1469	0.196343	196	0.522913
C50_1_TAG__NH4	1	0.6301-1.5963	0.990338	0.71	0.4143-1.2039	0.201232	197	0.529554
C18_1_LPE	0.65	0.4028-1.0363	0.0699902	0.72	0.4415-1.1896	0.2029	198	0.529554
C45_2_TAG	0.92	0.6248-1.3581	0.678333	0.76	0.49-1.1636	0.202919	199	0.529554
SPHINGANINE	0.8	0.505-1.2528	0.323336	0.72	0.4393-1.191	0.203031	200	0.529554
OXALOACETIC_ACID	1.35	0.8449-2.1497	0.210437	1.38	0.838-2.289	0.203909	201	0.529554
C18_2_CARNITINE	1.4	0.8324-2.3577	0.20438	1.44	0.8183-2.5412	0.205345	202	0.530644
GLYOXYLIC_ACID	0.57	0.3312-0.9848	0.0438832	0.68	0.3785-1.2346	0.207224	203	0.532862
C16_1_CE__NH4	0.83	0.4985-1.3804	0.47199	0.7	0.3952-1.2245	0.208434	204	0.533345
C48_2_TAG	0.98	0.6248-1.524	0.914216	0.73	0.4392-1.1991	0.210837	205	0.535082
C46_1_TAG	0.98	0.6194-1.563	0.945319	0.72	0.4276-1.2078	0.212323	206	0.535082
C20_5_LPC	0.56	0.3276-0.9481	0.0310248	0.7	0.3969-1.2298	0.213808	207	0.535082
CREATINE	1.5	0.9103-2.4835	0.111165	1.41	0.8173-2.4465	0.215416	208	0.535082
HYDROXYPROLINE	0.8	0.4946-1.2878	0.355521	0.72	0.4328-1.2083	0.215916	209	0.535082
C52_6_TAG	0.8	0.516-1.2446	0.324322	0.74	0.4555-1.1968	0.218283	210	0.535082
OLEOYL_LEUCINE	0.81	0.5204-1.2713	0.364565	0.73	0.4395-1.2071	0.218803	211	0.535082
KYNURENINE	1.35	0.923-1.9644	0.122578	1.26	0.8705-1.8267	0.219948	212	0.535082
C48_1_TAG__NH4	1	0.6373-1.5761	0.992465	0.73	0.4335-1.2131	0.220922	213	0.535082
C43_0_TAG	0.93	0.5561-1.558	0.785027	0.7	0.3979-1.2394	0.222644	214	0.535082
PUTATIVE_N_ACETYLORNITHINE_1	1.4	0.8578-2.2707	0.179516	1.38	0.8229-2.3056	0.223098	215	0.535082
C18_1_CARNITINE	1.34	0.821-2.1883	0.241432	1.41	0.8113-2.4502	0.223153	216	0.535082
C32_0_DAG__NH4	1.01	0.6516-1.5751	0.953973	0.73	0.444-1.2088	0.223244	217	0.535082
C49_0_TAG__NH4	1.01	0.6278-1.6328	0.95937	0.71	0.4164-1.2274	0.223633	218	0.535082
C43_1_TAG__NH4	0.97	0.6221-1.5	0.877518	0.74	0.4559-1.2034	0.225366	219	0.535082
C46_0_TAG__NH4	0.99	0.631-1.5663	0.979837	0.73	0.436-1.2169	0.226202	220	0.535082
C49_3_TAG	0.92	0.5849-1.4532	0.726164	0.73	0.4451-1.2123	0.227544	221	0.535082
C49_2_TAG__NH4	0.96	0.6123-1.506	0.859829	0.73	0.4445-1.2132	0.228016	222	0.535082
TRIMETHYLAMINE_N_OXIDE	1.62	1.0327-2.5372	0.0357075	1.34	0.8324-2.1545	0.228589	223	0.535082
PUTATIVE_HIPPURATE	1.37	0.8287-2.2696	0.219103	1.39	0.8106-2.3728	0.232607	224	0.540643
C56_9_TAG__NH4	0.79	0.5073-1.2294	0.295913	0.75	0.4597-1.2083	0.233036	225	0.540643
C14_0_CE__NH4	0.72	0.4462-1.1673	0.183726	0.73	0.4423-1.221	0.234345	226	0.541275
C54_9_TAG	0.76	0.5073-1.1288	0.171839	0.77	0.5004-1.1892	0.239828	227	0.547499
C49_1_TAG__NH4	1.01	0.6286-1.6079	0.982176	0.73	0.431-1.2349	0.240241	228	0.547499
ASPARTATE	1.59	0.9252-2.7157	0.0935644	1.4	0.797-2.4688	0.240686	229	0.547499
CITRULLINE	1.21	0.7724-1.8933	0.40617	1.33	0.824-2.1581	0.241235	230	0.547499
C45_0_TAG__NH4	0.97	0.6001-1.5722	0.905782	0.73	0.4254-1.2422	0.243308	231	0.549813
BETAINE	1.6	0.9284-2.7603	0.0905205	1.42	0.786-2.5515	0.246772	232	0.551834
IMIDAZOLEACETIC_ACID	0.7	0.4325-1.1446	0.15679	0.74	0.4367-1.2378	0.247136	233	0.551834
N_CARBAMOYL_BETA_ALANINE	1.68	1.0629-2.6579	0.0263637	1.34	0.8162-2.1953	0.247983	234	0.551834
C50_3_TAG__NH4	0.95	0.6035-1.4854	0.811965	0.74	0.4477-1.2311	0.248431	235	0.551834
PHOSPHOCHOLINE	0.72	0.4336-1.2036	0.211869	0.73	0.4226-1.2513	0.24994	236	0.552833
LEUCINE	1.73	1.0289-2.9032	0.0386873	1.4	0.7867-2.4919	0.252513	237	0.555971
C20_4_LPC	0.61	0.3695-0.998	0.049058	0.74	0.4343-1.2469	0.254371	238	0.555971
C12_1_CARNITINE	1.35	0.8157-2.237	0.24264	1.38	0.7929-2.4022	0.254554	239	0.555971
C52_1_TAG	1.1	0.6911-1.76	0.681368	0.73	0.4234-1.257	0.255958	240	0.556709
C16_0_CERAMIDE__D18_1_	0.79	0.5017-1.2435	0.308282	0.76	0.4688-1.2254	0.258129	241	0.5591
C6_CARNITINE	1.56	0.9657-2.5183	0.0691496	1.36	0.7943-2.3205	0.263553	242	0.568491
C46_4_TAG	0.93	0.6006-1.4379	0.742041	0.76	0.4667-1.2347	0.266782	243	0.573086
C47_0_TAG	0.96	0.6362-1.4617	0.864194	0.77	0.4922-1.2196	0.270325	244	0.577299
C56_9_TAG	0.75	0.4624-1.2052	0.231599	0.75	0.4443-1.2557	0.270954	245	0.577299
C38_3_PE_PLASMALOGEN	0.66	0.4134-1.0548	0.0824651	0.75	0.454-1.2493	0.272154	246	0.577497
OROTIC_ACID	1.3	0.9127-1.8636	0.144795	1.25	0.8409-1.8445	0.273335	247	0.577655
C56_8_TAG__NH4	0.84	0.5348-1.3148	0.442846	0.76	0.4662-1.2432	0.275755	248	0.578501
TAUROCHOLIC_ACID	1.38	0.8644-2.2012	0.177355	1.33	0.7951-2.2273	0.276879	249	0.578501
C50_2_TAG__NH4	1.01	0.6427-1.5946	0.957663	0.75	0.4494-1.2575	0.27706	250	0.578501
C45_1_TAG	0.97	0.6546-1.4374	0.879434	0.79	0.5109-1.2165	0.282644	251	0.587809
C54_1_TAG	1.05	0.6377-1.7183	0.856532	0.73	0.4162-1.2938	0.284704	252	0.588417
PYRROLIDONECARBOXYLIC_ACID	1.25	0.7914-1.9678	0.340551	1.34	0.7816-2.3103	0.285191	253	0.588417
C32_0_DAG	1.05	0.6697-1.638	0.839211	0.76	0.4577-1.2633	0.29025	254	0.594612
C38_5_PE_PLASMALOGEN	0.86	0.5451-1.3471	0.503421	0.77	0.4697-1.2538	0.290567	255	0.594612
C43_2_TAG	0.93	0.5395-1.5999	0.790643	0.72	0.3973-1.3195	0.29161	256	0.594612
C54_8_TAG	0.8	0.5163-1.2415	0.3204	0.77	0.4788-1.2498	0.294169	257	0.597496
C54_1_TAG__NH4	1.05	0.6401-1.7186	0.849796	0.74	0.4219-1.3049	0.300175	258	0.604448
C34_2_PE_PLASMALOGEN	0.8	0.5049-1.283	0.361487	0.77	0.4613-1.2696	0.300382	259	0.604448
METHIONINE_SULFOXIDE	1.34	0.8707-2.0746	0.181869	1.28	0.8014-2.0461	0.30109	260	0.604448
C50_4_TAG	0.92	0.5883-1.4432	0.720805	0.77	0.4694-1.2645	0.302224	261	0.604448
C52_5_TAG__NH4	0.88	0.5689-1.3632	0.568539	0.78	0.4814-1.2557	0.303466	262	0.604615
C46_0_TAG	1.04	0.6549-1.6629	0.857588	0.76	0.4545-1.2848	0.310251	263	0.61223
VALINE	1.77	1.0735-2.9183	0.0252133	1.35	0.7575-2.3939	0.310714	264	0.61223
C36_2_PS_PLASMALOGEN	0.88	0.5568-1.395	0.589774	0.77	0.4711-1.2713	0.311494	265	0.61223
C54_6_TAG	0.85	0.5363-1.3515	0.495032	0.77	0.4562-1.2849	0.311979	266	0.61223
N_LAUROYLGLYCINE	0.71	0.3842-1.3032	0.266979	0.71	0.3657-1.3865	0.317919	267	0.61603
C3_CARNITINE	1.69	1.0517-2.7167	0.0301519	1.3	0.7749-2.1827	0.319919	268	0.61603
PC_SOURCE_FRAGMENT	1.22	0.771-1.9216	0.398885	1.28	0.7852-2.0955	0.320026	269	0.61603
C48_1_TAG	1.08	0.6922-1.6875	0.732463	0.78	0.4708-1.2796	0.320546	270	0.61603
LACTIC_ACID	1.14	0.7846-1.6432	0.500411	1.22	0.8232-1.8049	0.322986	271	0.61603
C54_3_TAG	1.44	0.8774-2.371	0.148672	1.31	0.766-2.2449	0.323009	272	0.61603
NIACINAMIDE	0.77	0.4928-1.2048	0.253029	0.79	0.4855-1.2693	0.323531	273	0.61603
C45_1_TAG__NH4	1	0.6339-1.5655	0.986798	0.78	0.4718-1.2827	0.325012	274	0.61603
C32_1_DAG__NH4	1.04	0.6743-1.6108	0.852473	0.78	0.4813-1.275	0.325818	275	0.61603
C8_CARNITINE	1.39	0.8307-2.3096	0.211671	1.32	0.7565-2.3143	0.326221	276	0.61603
C36_1_PE	0.96	0.5975-1.5407	0.864075	0.77	0.455-1.3012	0.328155	277	0.61603
C49_0_TAG	1.11	0.6774-1.8034	0.688728	0.76	0.4406-1.3163	0.329215	278	0.61603
METHYLTHIOADENOSINE	1.84	0.8253-4.0861	0.136381	1.52	0.6552-3.5284	0.329257	279	0.61603
C38_6_PE_PLASMALOGEN	0.83	0.5177-1.3262	0.43322	0.78	0.465-1.2952	0.331933	280	0.616424
C54_5_TAG	0.89	0.5754-1.3745	0.597482	0.79	0.4842-1.2784	0.33295	281	0.616424
C26_CARNITINE	0.89	0.5277-1.4932	0.653511	0.76	0.432-1.3289	0.333011	282	0.616424
C34_3_DAG__NH4	0.98	0.6279-1.5267	0.925555	0.79	0.4835-1.2856	0.340637	283	0.624414
GLYCERIC_ACID	1.18	0.7609-1.8325	0.458376	1.26	0.7844-2.0173	0.340931	284	0.624414
C51_0_TAG__NH4	0.98	0.702-1.3737	0.915568	0.84	0.5772-1.2099	0.341801	285	0.624414
_5_MTHF	1.39	0.8288-2.3238	0.212807	1.31	0.7509-2.2828	0.342112	286	0.624414
C36_1_DAG__NH4	1.11	0.7004-1.7435	0.667607	0.78	0.4589-1.3126	0.344455	287	0.625434
C46_4_TAG__NH4	0.95	0.6229-1.4482	0.810863	0.8	0.4981-1.2761	0.345067	288	0.625434
_2_AMINOADIPIC_ACID	1.39	0.8573-2.2689	0.180322	1.3	0.7518-2.2543	0.346431	289	0.625733
C36_0_DAG	0.95	0.6198-1.443	0.795857	0.79	0.4907-1.2859	0.348874	290	0.627973
C47_1_TAG	1.04	0.6689-1.6022	0.876393	0.8	0.4934-1.2881	0.354507	291	0.634311
C14_0_CE	0.73	0.4459-1.1971	0.212825	0.78	0.4661-1.3149	0.354825	292	0.634311
C53_2_TAG__NH4	1.04	0.6484-1.6548	0.882929	0.78	0.4644-1.3223	0.36098	293	0.643111
SEROTONIN	1.02	0.7082-1.4564	0.932912	1.2	0.8079-1.7852	0.365297	294	0.647222
C58_10_TAG	0.76	0.4653-1.2295	0.260013	0.78	0.4616-1.3296	0.365767	295	0.647222
C45_2_TAG__NH4	1.01	0.5751-1.7794	0.968069	0.75	0.3992-1.4047	0.367464	296	0.648027
C54_8_TAG__NH4	0.89	0.5753-1.364	0.581941	0.81	0.5033-1.2935	0.372794	297	0.655213
C49_1_TAG	1.05	0.6558-1.6652	0.852949	0.8	0.4797-1.3251	0.382122	298	0.665283
THIAMINE	1.07	0.6907-1.6673	0.753647	1.24	0.7648-2.0128	0.382265	299	0.665283
C50_3_TAG	1.03	0.6493-1.6344	0.899496	0.8	0.476-1.3302	0.383403	300	0.665283
C36_1_DAG	1.13	0.7121-1.7958	0.602334	0.79	0.4626-1.346	0.384654	301	0.665283
C56_4_TAG	1.31	0.8385-2.0617	0.233032	1.24	0.7644-2.0053	0.38537	302	0.665283
FUMARIC_ACID	1.09	0.7158-1.6664	0.682551	1.23	0.7706-1.9616	0.38617	303	0.665283
C60_12_TAG	0.77	0.4653-1.2769	0.312157	0.79	0.4613-1.3538	0.391404	304	0.672082
C18_1_LPC_PLASMALOGEN	1.1	0.653-1.8604	0.715563	1.28	0.7277-2.2388	0.394557	305	0.675275
METHIONINE	0.87	0.5707-1.3331	0.527614	0.82	0.5211-1.2963	0.398818	306	0.680336
C4_OH_CARNITINE	1.28	0.8635-1.8861	0.221043	1.2	0.7822-1.846	0.40171	307	0.680417
ACETYLGLYCINE	0.59	0.3568-0.9609	0.0341818	0.79	0.4565-1.3693	0.401771	308	0.680417
HIPPURIC_ACID	1.07	0.7493-1.5177	0.720978	1.18	0.7977-1.7554	0.402775	309	0.680417
C32_2_DAG__NH4	1.05	0.624-1.7641	0.856134	0.78	0.4409-1.3965	0.409622	310	0.686843
CORTISOL	0.8	0.5354-1.2051	0.289733	0.83	0.5432-1.2834	0.410817	311	0.686843
C53_3_TAG__NH4	0.97	0.6013-1.5676	0.903685	0.8	0.477-1.3546	0.412128	312	0.686843
ORNITHINE	1.33	0.791-2.2524	0.279441	1.26	0.7253-2.1763	0.415608	313	0.686843
C50_1_TAG	1.15	0.7266-1.8343	0.543141	0.8	0.4764-1.3588	0.416146	314	0.686843
C32_1_DAG	1.09	0.7016-1.707	0.69093	0.81	0.4945-1.3393	0.417515	315	0.686843
C53_2_TAG	1.05	0.6526-1.6993	0.832141	0.81	0.477-1.3602	0.418396	316	0.686843
C18_1_LPC	0.65	0.4086-1.0413	0.0733709	0.81	0.495-1.3414	0.420747	317	0.686843
C50_2_TAG	1.09	0.6946-1.7171	0.702917	0.81	0.4884-1.349	0.420943	318	0.686843
_2_AMINOOCTANOIC_ACID	1.19	0.7633-1.8542	0.442946	1.21	0.7563-1.9514	0.420997	319	0.686843
_1_METHYLNICOTINAMIDE	0.79	0.5287-1.1658	0.230275	0.84	0.5448-1.289	0.421053	320	0.686843
PUTATIVE_URIDINE_PSEUDOURIDINE_1	0.6	0.2479-1.4744	0.268571	0.68	0.2576-1.7729	0.425883	321	0.691166
C36_2_PE_PLASMALOGEN	0.85	0.5417-1.3397	0.487709	0.82	0.5027-1.3373	0.426351	322	0.691166
C49_2_TAG	1.06	0.6545-1.7104	0.817967	0.81	0.4796-1.3665	0.428964	323	0.691417
C55_3_TAG__NH4	1.03	0.6438-1.6578	0.892742	0.81	0.4774-1.3694	0.429155	324	0.691417
XANTHOSINE	1.27	0.7993-2.0143	0.312464	1.22	0.7441-1.9985	0.431143	325	0.692263
C10_CARNITINE	1.3	0.7792-2.1661	0.315718	1.25	0.7144-2.1907	0.433331	326	0.692263
PSEUDOURIDINE	0.97	0.8864-1.0719	0.597808	0.96	0.8628-1.0654	0.433777	327	0.692263
GLYCOCHOLIC_ACID	1.25	0.7977-1.9471	0.33339	1.22	0.7428-1.9937	0.435728	328	0.692263
C40_7_PE_PLASMALOGEN	0.79	0.4756-1.3233	0.375132	0.8	0.4637-1.3957	0.438938	329	0.692263
GUANIDOACETIC_ACID	0.71	0.4238-1.1975	0.200614	0.81	0.4671-1.3918	0.439489	330	0.692263
C56_1_TAG__NH4	1	0.7059-1.4241	0.988194	0.86	0.5808-1.2668	0.440615	331	0.692263
C38_5_PE	0.79	0.4917-1.2602	0.318949	0.82	0.4935-1.3604	0.441215	332	0.692263
OLEOYL_GLYCINE	0.86	0.5555-1.3243	0.488575	0.83	0.506-1.3479	0.444023	333	0.692263
C14_1_CARNITINE	1.2	0.7339-1.9483	0.47285	1.23	0.7195-2.1168	0.444851	334	0.692263
C18_1_OH_CARNITINE	1.09	0.7168-1.6662	0.679988	1.2	0.7539-1.9031	0.444877	335	0.692263
THYROXINE	1.1	0.6758-1.8063	0.690949	1.23	0.7245-2.081	0.445595	336	0.692263
C38_4_PE	0.9	0.5573-1.4619	0.67702	0.81	0.4796-1.3832	0.447588	337	0.693297
PROLINE	1.33	0.8435-2.1032	0.218775	1.21	0.7301-2.0208	0.453958	338	0.696834
C18_2_LPC	0.66	0.3968-1.0864	0.101546	0.82	0.4789-1.3904	0.454622	339	0.696834
C18_0_MAG	0.84	0.5066-1.3823	0.486644	0.81	0.4728-1.3993	0.455446	340	0.696834
C56_7_TAG__NH4	0.92	0.5903-1.4392	0.720017	0.83	0.5138-1.3492	0.456982	341	0.696834
ADENOSINE	1.18	0.6964-1.9993	0.538536	1.24	0.7062-2.1663	0.457238	342	0.696834
C58_9_TAG__NH4	0.87	0.5384-1.4044	0.567691	0.82	0.4889-1.3804	0.457881	343	0.696834
C34_1_DAG__NH4	1.1	0.6903-1.7451	0.694087	0.82	0.4897-1.3861	0.465459	344	0.701753
ACETOACETIC_ACID	1.13	0.7342-1.7464	0.573899	1.19	0.7436-1.906	0.467667	345	0.701753
PUTATIVE_SPHINGOSINE	1.37	0.8705-2.1553	0.173693	1.2	0.7363-1.9468	0.467939	346	0.701753
C20_3_CE__NH4	0.86	0.5445-1.367	0.529567	0.83	0.5092-1.3644	0.468901	347	0.701753
C55_2_TAG__NH4	1.04	0.6548-1.6663	0.85479	0.83	0.4934-1.385	0.469599	348	0.701753
SUCCINIC_ACID_METHYLMALONIC_ACID	1.11	0.6593-1.8662	0.696152	1.24	0.69-2.2348	0.470047	349	0.701753
C38_6_PC_PLASMALOGEN	0.75	0.454-1.2453	0.268002	0.82	0.4801-1.4033	0.470524	350	0.701753
INDOLE_3_LACTIC_ACID	0.87	0.572-1.3317	0.527841	0.84	0.5244-1.3484	0.471987	351	0.701929
C22_5_CE	0.72	0.4657-1.1273	0.153074	0.84	0.5253-1.349	0.474052	352	0.702998
C52_4_TAG	1.33	0.8169-2.1541	0.25335	1.21	0.7187-2.0249	0.477722	353	0.706434
N_ACETYL_L_ALANINE	0.98	0.9047-1.0684	0.688518	0.97	0.8833-1.0601	0.480237	354	0.707799
AMINOISOBUTYRIC_ACID	1.42	0.8655-2.3373	0.164515	1.22	0.7023-2.1139	0.482199	355	0.707799
C16_1_LPC	0.77	0.4883-1.2095	0.255115	0.84	0.517-1.3659	0.482713	356	0.707799
C52_2_TAG__NH4	1.12	0.6979-1.7825	0.648089	0.83	0.4879-1.4131	0.493167	357	0.721101
C14_2_CARNITINE	1.18	0.7085-1.9647	0.525041	1.21	0.6959-2.1082	0.497838	358	0.725898
THREONINE	0.85	0.5365-1.3469	0.489084	0.84	0.5144-1.3838	0.500786	359	0.728163
TAURINE	0.98	0.5715-1.6779	0.93921	1.22	0.6795-2.1893	0.505863	360	0.733502
C55_2_TAG	1.09	0.6676-1.788	0.724691	0.84	0.4856-1.4447	0.523968	361	0.757649
_3_HYDROXYANTHRANILIC_ACID	0.97	0.5988-1.5783	0.909042	0.85	0.5019-1.423	0.526676	362	0.75946
C44_13_PE_PLASMALOGEN	0.78	0.5007-1.217	0.274232	0.86	0.537-1.3778	0.530933	363	0.761204
C34_2_DAG__NH4	1.07	0.6751-1.687	0.780798	0.85	0.5127-1.4123	0.53225	364	0.761204
C56_8_TAG	0.85	0.5227-1.3955	0.528821	0.85	0.4987-1.4326	0.53226	365	0.761204
TYROSINE	1.17	0.7374-1.8439	0.51123	0.85	0.4996-1.437	0.538623	366	0.768201
C36_3_PC	0.85	0.5465-1.3196	0.467345	0.86	0.5389-1.3826	0.540348	367	0.76856
C38_4_PC_PLASMALOGEN	0.88	0.5499-1.4208	0.610344	0.86	0.5197-1.4128	0.54475	368	0.768849
BETA_ALANINE	1.19	0.7602-1.8656	0.445664	1.17	0.7032-1.947	0.545463	369	0.768849
C34_3_DAG	1.09	0.6819-1.7445	0.717252	0.85	0.5081-1.4308	0.54614	370	0.768849
C24_1_CERAMIDE__D18_1_	0.94	0.6024-1.4659	0.783881	0.86	0.5325-1.396	0.546443	371	0.768849
C34_1_PC_PLASMALOGEN_B	0.76	0.4786-1.2182	0.257759	0.86	0.5254-1.4098	0.551176	372	0.773425
_3_HYDROXYBUTYRIC_ACID	0.83	0.5237-1.319	0.432468	0.86	0.5206-1.4211	0.556333	373	0.777153
C56_6_TAG__NH4	1	0.6352-1.5599	0.984104	0.86	0.5257-1.414	0.556811	374	0.777153
C45_0_TAG	1.1	0.6773-1.7741	0.708598	0.86	0.5061-1.446	0.559892	375	0.779369
C53_3_TAG	1.24	0.7369-2.0766	0.420864	1.18	0.6772-2.0458	0.563357	376	0.780437
C22_6_CE	0.73	0.4388-1.2046	0.215964	0.85	0.4956-1.4664	0.564166	377	0.780437
GLN_SOURCE_FRAGMENT	1.01	0.6228-1.6278	0.977635	1.17	0.6894-1.9755	0.565144	378	0.780437
CARNOSINE	1.07	0.6703-1.7085	0.776354	1.15	0.703-1.8915	0.57256	379	0.786688
C32_2_DAG	1.18	0.7561-1.8266	0.472972	0.87	0.5285-1.4229	0.572764	380	0.786688
C56_1_TAG	1.08	0.6644-1.7494	0.760738	0.86	0.499-1.4713	0.575378	381	0.786688
SERINE	0.81	0.5138-1.2922	0.384002	0.86	0.5205-1.4375	0.575699	382	0.786688
INDOLE_3_CARBOXYLIC_ACID	0.99	0.82-1.1986	0.928735	1.06	0.8573-1.3167	0.579704	383	0.790093
GLYCOCHENODEOXYCHOLIC_ACID	1.22	0.774-1.911	0.396035	1.15	0.6958-1.9042	0.583869	384	0.793697
UROCANIC_ACID	0.97	0.5627-1.6571	0.899036	1.18	0.6566-2.1042	0.586345	385	0.79462
C36_4_DAG__NH4	1.08	0.6661-1.7573	0.750361	0.86	0.5018-1.478	0.587592	386	0.79462
INDOLE_3_PROPANOIC_ACID	0.75	0.4696-1.1872	0.216949	0.87	0.5167-1.456	0.590283	387	0.796196
C36_2_PE	1	0.6261-1.604	0.992973	0.87	0.5207-1.4551	0.596526	388	0.801549
GLUTAMINE	0.99	0.6154-1.587	0.961024	1.15	0.6849-1.9303	0.597368	389	0.801549
C30_0_DAG	1.24	0.784-1.9587	0.358617	0.87	0.5193-1.4593	0.598859	390	0.801549
C38_6_PE	0.85	0.5259-1.3874	0.524271	0.87	0.5198-1.4618	0.602604	391	0.803111
C58_7_TAG	1.13	0.7143-1.79	0.60005	1.14	0.6972-1.8609	0.603102	392	0.803111
C2_CARNITINE	1.23	0.7788-1.933	0.37778	1.14	0.6938-1.8735	0.604822	393	0.803351
_3_DEHYDROXYCARNITINE	0.82	0.4686-1.4263	0.477992	0.86	0.4732-1.55	0.608657	394	0.806394
_1_5_AG___1_DEOXYGLUCOSE	1.02	0.933-1.1084	0.702198	1.03	0.9308-1.129	0.614175	395	0.80692
C56_3_TAG	1.26	0.8063-1.9838	0.306532	1.13	0.6975-1.8389	0.614851	396	0.80692
ADMA	1.28	0.7974-2.0576	0.306019	1.14	0.68-1.9187	0.615156	397	0.80692
SPHINGOSINE	0.95	0.6365-1.4293	0.818807	0.9	0.5812-1.3786	0.615238	398	0.80692
C34_1_DAG	1.17	0.7356-1.8574	0.508867	0.88	0.5226-1.4735	0.621143	399	0.812623
C58_6_TAG	0.94	0.598-1.4838	0.796438	0.88	0.5418-1.4437	0.623191	400	0.813264
HISTIDINE	0.89	0.5859-1.3579	0.593776	0.9	0.5783-1.3928	0.629375	401	0.813891
C36_2_DAG__NH4	1.1	0.71-1.7163	0.660623	0.89	0.5432-1.4484	0.631736	402	0.813891
C54_4_TAG__NH4	1.23	0.7544-2.0077	0.405844	1.14	0.6711-1.9282	0.632239	403	0.813891
C36_4_PE	0.92	0.5852-1.4416	0.711519	0.89	0.5457-1.4468	0.634819	404	0.813891
C58_6_TAG__NH4	1.04	0.655-1.6447	0.874031	0.88	0.5331-1.4683	0.635563	405	0.813891
C36_3_DAG__NH4	1.03	0.6488-1.6469	0.888965	0.89	0.5339-1.4675	0.636293	406	0.813891
INDOXYL_SULFATE	1.32	0.8447-2.0584	0.223558	1.12	0.6971-1.804	0.636541	407	0.813891
ALPHA_GLYCEROPHOSPHOCHOLINE	1	0.6203-1.6158	0.996231	1.13	0.6775-1.8875	0.638031	408	0.813891
C60_12_TAG__NH4	0.91	0.5647-1.4651	0.69675	0.88	0.5239-1.487	0.63888	409	0.813891
XANTHURENIC_ACID	1.18	0.7881-1.7714	0.419301	1.11	0.7127-1.7362	0.639263	410	0.813891
C12_CARNITINE	1.16	0.7002-1.9199	0.565337	1.14	0.6516-1.9843	0.651204	411	0.827076
KYNURENIC_ACID	1.63	1.0219-2.6072	0.040295	1.12	0.6695-1.8896	0.656773	412	0.830591
C55_3_TAG	1.19	0.7262-1.949	0.490469	1.13	0.6659-1.9006	0.659661	413	0.830591
C36_3_PS_PLASMALOGEN	1.22	0.7521-1.9729	0.42258	1.12	0.6659-1.9003	0.659883	414	0.830591
PTERIN	1	0.6243-1.6111	0.990419	0.89	0.5297-1.4977	0.662432	415	0.830591
C52_2_TAG	1.21	0.7654-1.9094	0.415897	0.89	0.5341-1.4917	0.664388	416	0.830591
C20_4_CARNITINE	1.22	0.7306-2.035	0.447878	1.13	0.6517-1.9575	0.664402	417	0.830591
C52_3_TAG	1.29	0.8077-2.0656	0.285249	1.12	0.672-1.8587	0.668205	418	0.830591
C52_3_TAG__NH4	1.1	0.6843-1.7543	0.703713	0.89	0.5306-1.5014	0.668271	419	0.830591
_1_2_4_TRIMETHYLBENZENE	0.83	0.5235-1.3064	0.415468	0.9	0.5504-1.4666	0.668458	420	0.830591
TAURODEOXYCHOLIC_ACID___TAUROCHE	1.17	0.7546-1.823	0.478486	1.11	0.684-1.8032	0.671469	421	0.830591
ATP	0.98	0.8773-1.0866	0.661247	0.97	0.8659-1.0972	0.671783	422	0.830591
C22_4_CE	0.81	0.5471-1.1878	0.275844	0.91	0.5885-1.4083	0.673065	423	0.830591
C56_5_TAG__NH4	1.06	0.6766-1.6676	0.793115	0.9	0.5468-1.4822	0.679613	424	0.836693
C54_2_TAG__NH4	1.17	0.7273-1.8954	0.511218	0.89	0.521-1.5352	0.685447	425	0.839295
PUTRESCINE	1.07	0.6867-1.6587	0.77236	1.1	0.6853-1.7764	0.685707	426	0.839295
GABA	1.26	0.7901-2.0094	0.331795	1.11	0.665-1.8581	0.68655	427	0.839295
GLUCOSE_FRUCTOSE_GALACTOSE_WATER	1.12	0.6959-1.7918	0.647389	0.89	0.5139-1.5588	0.695151	428	0.847824
INOSINE	1.11	0.6786-1.8304	0.668401	1.11	0.6491-1.8962	0.704118	429	0.855232
C34_3_PE_PLASMALOGEN	0.98	0.642-1.5084	0.941153	0.91	0.5763-1.4512	0.704501	430	0.855232
C56_4_TAG__NH4	1.06	0.6863-1.6357	0.794159	0.92	0.571-1.4677	0.713805	431	0.862419
C58_8_TAG__NH4	0.97	0.6078-1.5392	0.888148	0.91	0.5518-1.503	0.714335	432	0.862419
PUTATIVE_1_METHYLGUANOSINE	1.43	0.9225-2.2294	0.109281	1.1	0.6616-1.8206	0.718589	433	0.862419
URIDINE	1.07	0.6721-1.692	0.784869	1.1	0.641-1.9004	0.721917	434	0.862419
C36_1_PC_PLASMALOGEN	0.96	0.616-1.5047	0.86774	1.09	0.6753-1.7605	0.723512	435	0.862419
PHOSPHOCREATINE	1.12	0.6546-1.9117	0.681677	1.11	0.6214-1.9845	0.723542	436	0.862419
C36_1_PE_PLASMALOGEN	0.96	0.6485-1.4101	0.821421	1.08	0.7083-1.6428	0.724006	437	0.862419
BILIRUBIN	0.95	0.5687-1.5753	0.832439	0.91	0.5197-1.5767	0.724993	438	0.862419
PIPECOLIC_ACID	0.92	0.6198-1.3739	0.69219	0.92	0.5977-1.4315	0.726284	439	0.862419
GLYCINE	0.82	0.5034-1.323	0.409664	1.1	0.6477-1.864	0.726944	440	0.862419
C36_3_PE	1.12	0.6971-1.803	0.637199	1.09	0.6562-1.8258	0.72927	441	0.863217
ASPARAGINE	0.85	0.5214-1.3935	0.524251	1.1	0.6358-1.9029	0.733425	442	0.866171
C56_5_TAG	1.15	0.717-1.8343	0.567551	1.09	0.6589-1.8051	0.735937	443	0.867176
C36_4_PE_PLASMALOGEN	1.1	0.7271-1.6494	0.663708	1.08	0.6917-1.6803	0.73973	444	0.869683
OLEOYL_SERINE	0.89	0.589-1.3323	0.560453	0.92	0.5604-1.5109	0.742388	445	0.870847
C54_3_TAG__NH4	1.26	0.7823-2.0406	0.338896	1.09	0.6427-1.8415	0.753735	446	0.880586
GLUTATHIONE_REDUCED	1.06	0.6354-1.7739	0.819233	1.09	0.629-1.8951	0.754918	447	0.880586
DEOXYCHOLIC_ACID	1.17	0.7488-1.8296	0.489679	1.08	0.6616-1.7664	0.755752	448	0.880586
C36_2_DAG	1.16	0.7467-1.8141	0.502765	0.93	0.5645-1.5166	0.757993	449	0.88123
C16_1_CE	0.97	0.578-1.6182	0.898635	0.92	0.5265-1.5997	0.762082	450	0.884002
C18_1_CE	0.72	0.4544-1.1457	0.166547	0.92	0.5524-1.5459	0.763764	451	0.884002
C40_7_PC_PLASMALOGEN	0.97	0.6065-1.5498	0.897128	1.08	0.6571-1.7657	0.768208	452	0.886443
C56_2_TAG__NH4	1.12	0.7109-1.7676	0.622989	0.93	0.5632-1.5291	0.769269	453	0.886443
C30_0_DAG__NH4	1.23	0.7492-2.023	0.41188	0.92	0.5307-1.6018	0.77328	454	0.889102
C34_1_PC_PLASMALOGEN_A	0.89	0.5523-1.4471	0.648328	1.08	0.6415-1.8123	0.776091	455	0.890372
MYRISTOLEIC_ACID	1.09	0.687-1.7236	0.71872	1.07	0.654-1.7613	0.779725	456	0.89258
C20_CARNITINE	0.88	0.5829-1.3156	0.522822	0.94	0.6164-1.4396	0.782572	457	0.893879
TRYPTOPHAN	1.04	0.6577-1.6302	0.880324	1.07	0.6495-1.7602	0.792413	458	0.89568
C34_0_DAG	1.1	0.7327-1.6636	0.636189	0.94	0.6012-1.4753	0.793454	459	0.89568
C16_CARNITINE	1.04	0.6039-1.7986	0.881919	0.92	0.5027-1.6922	0.793902	460	0.89568
C20_4_CE	0.83	0.5443-1.2618	0.381093	0.94	0.5985-1.4808	0.793955	461	0.89568
PUTATIVE_2_METHYLGUANOSINE	1.36	0.868-2.1218	0.180488	1.07	0.6511-1.7524	0.794061	462	0.89568
HISTAMINE	1.06	0.6718-1.682	0.794135	1.07	0.6573-1.7304	0.794444	463	0.89568
ASPARTIC_ACID	0.9	0.5446-1.5013	0.697099	0.93	0.5423-1.5991	0.796285	464	0.895821
P_METHYLHIPPURIC_ACID	1.14	0.6659-1.9583	0.629523	1.08	0.5932-1.9716	0.798388	465	0.896255
C16_1_MAG	1.16	0.7192-1.8727	0.541959	1.07	0.64-1.7826	0.800813	466	0.896386
N_ACETYLPUTRESCINE	1.16	0.7589-1.7605	0.499813	1.06	0.6756-1.6558	0.806233	467	0.896386
C16_0_CE	0.79	0.5061-1.2275	0.292362	0.94	0.5832-1.5212	0.806612	468	0.896386
ACETYLCHOLINE	1.05	0.6685-1.6393	0.841389	0.94	0.5811-1.5279	0.809503	469	0.896386
CITRIC_ACID_ISOCITRIC_ACID	1.02	0.5764-1.8155	0.938214	1.08	0.5813-2.0031	0.809537	470	0.896386
ALANINE	1.15	0.7387-1.7909	0.535756	1.06	0.6471-1.7453	0.810047	471	0.896386
_2_KETOISOVALERIC_ACID_KIV	0.97	0.8617-1.0891	0.595392	0.97	0.7889-1.2047	0.81382	472	0.896386
LYSINE	1.06	0.6764-1.6483	0.810707	0.94	0.5785-1.5377	0.814635	473	0.896386
C38_4_DAG_1	1.1	0.6941-1.742	0.685946	0.94	0.5706-1.5548	0.81497	474	0.896386
C36_3_PE_PLASMALOGEN	0.95	0.6036-1.483	0.809194	0.94	0.5809-1.534	0.816045	475	0.896386
D_GLUCONIC_ACID	0.99	0.8405-1.1595	0.8754	1.02	0.8378-1.2514	0.817394	476	0.896386
C42_11_PE_PLASMALOGEN	0.9	0.5825-1.4024	0.651889	0.95	0.5925-1.5166	0.823664	477	0.901368
C56_7_TAG	1.06	0.6618-1.6864	0.817943	1.06	0.6417-1.7396	0.828699	478	0.904657
C18_2_SM	0.92	0.583-1.466	0.738382	0.95	0.5845-1.539	0.830136	479	0.904657
GUANINE	0.96	0.5667-1.6117	0.864995	0.94	0.5349-1.666	0.842369	480	0.916076
ACETAMINOPHEN	0.92	0.5996-1.3965	0.68055	0.96	0.6104-1.4982	0.845314	481	0.916977
_2_HYDROXYBUTYRIC_ACID	1.12	0.7424-1.6863	0.591331	1.05	0.6393-1.7252	0.846711	482	0.916977
C18_CARNITINE	0.96	0.5798-1.6048	0.889747	0.95	0.5437-1.6653	0.861825	483	0.92618
ARACHINDONOYL_PHENYLALANINE	1.03	0.6874-1.5533	0.874655	0.96	0.6208-1.4907	0.862427	484	0.92618
C36_2_PC_PLASMALOGEN	0.91	0.5874-1.4034	0.663925	1.04	0.6537-1.6602	0.863382	485	0.92618
PUTATIVE_3_AMINOISOBUTYRIC_ACID	1.06	0.7343-1.5202	0.766942	1.04	0.6981-1.5348	0.863749	486	0.92618
COTININE	0.81	0.353-1.8612	0.620496	0.93	0.3788-2.2596	0.864516	487	0.92618
C56_6_TAG	1.04	0.6604-1.6517	0.852711	1.04	0.6384-1.7047	0.86602	488	0.92618
C36_4_DAG	1.16	0.7025-1.9313	0.554278	1.05	0.6088-1.7987	0.869628	489	0.92618
C34_2_PE	1.06	0.6889-1.6303	0.791589	0.96	0.6058-1.5279	0.869907	490	0.92618
_3_AMINOISOBUTYRIC_ACID	0.85	0.5409-1.3444	0.49286	0.96	0.5741-1.6002	0.871177	491	0.92618
C56_2_TAG	1.22	0.7768-1.9168	0.38765	1.04	0.6346-1.7083	0.873089	492	0.926326
C58_8_TAG	0.97	0.6102-1.5405	0.895704	1.04	0.6322-1.7081	0.879518	493	0.930459
C34_2_DAG	1.2	0.752-1.9185	0.442966	0.96	0.5744-1.6087	0.88055	494	0.930459
C36_3_DAG	1.11	0.6846-1.7947	0.675257	0.96	0.571-1.6227	0.886201	495	0.934469
C54_2_TAG	1.28	0.7852-2.0986	0.319432	0.96	0.552-1.6727	0.887938	496	0.934469
C47_0_TAG__NH4	1.22	0.8247-1.7911	0.324095	0.97	0.638-1.477	0.889714	497	0.934469
C40_6_PE	1.13	0.7955-1.5935	0.503428	0.98	0.6698-1.4197	0.895465	498	0.93862
C18_3_CE	0.87	0.5333-1.4216	0.579887	0.97	0.5713-1.6344	0.898212	499	0.939613
C56_3_TAG__NH4	1.18	0.7492-1.8526	0.477938	1.03	0.6308-1.6815	0.906323	500	0.946201
SPHINGOSINE_ISOMER3	0.87	0.5177-1.4485	0.583518	0.97	0.5508-1.7025	0.9111	501	0.94929
CYTOSINE	1.15	0.7112-1.8464	0.575673	1.03	0.6164-1.7149	0.915248	502	0.951712
SDMA	0.89	0.5386-1.47	0.6484	0.97	0.5718-1.6593	0.92291	503	0.957772
C18_2_CE	0.81	0.5212-1.2703	0.364314	0.98	0.5972-1.6004	0.928327	504	0.961481
HOMOCYSTEINE	0.91	0.6003-1.3846	0.664507	1.02	0.6407-1.624	0.933398	505	0.963014
S_ADENOSYLMETHIONINE	1.33	0.8115-2.1891	0.256435	1.02	0.6009-1.7412	0.933496	506	0.963014
N_ACETYLTRYPTOPHAN	1.19	0.7845-1.8156	0.408662	1.02	0.6528-1.5855	0.93948	507	0.967275
GUANOSINE	1.01	0.6069-1.6865	0.964335	0.98	0.5615-1.7161	0.948067	508	0.973547
ARGININE	1.04	0.6559-1.6502	0.866362	1.02	0.6204-1.6644	0.949302	509	0.973547
C34_4_PC_PLASMALOGEN	0.99	0.6603-1.4889	0.967317	1.01	0.6526-1.5745	0.951801	510	0.974197
PROLINE_BETAINE	0.95	0.5695-1.5776	0.836817	1.01	0.5925-1.7359	0.95908	511	0.977967
C14_CARNITINE	1.08	0.7068-1.6472	0.724694	0.99	0.6176-1.5811	0.960472	512	0.977967
HYDROXYPHENYLPYRUVIC_ACID	1.02	0.7374-1.4092	0.907448	0.99	0.6983-1.4074	0.961133	513	0.977967
C18_0_MAG__NH4	1.05	0.6408-1.7292	0.839365	1.01	0.5994-1.7102	0.962979	514	0.977967
_5_HYDROXYTRYPTOPHAN	0.98	0.5408-1.7796	0.949726	1.01	0.5356-1.9154	0.96874	515	0.981908
N_ACETYL_L_GLUTAMINE	1.02	0.8553-1.2197	0.815244	1	0.8342-1.2027	0.985926	516	0.996271
PHENYLACETYLGLYCINE	1	0.6078-1.653	0.992641	1	0.5732-1.7613	0.986728	517	0.996271
UDP_GLCNAC	1.22	0.7166-2.0892	0.459885	1	0.5558-1.8094	0.992561	518	0.99892
OLEOYL_PHENYLALANINE	1.11	0.7167-1.7052	0.65019	1	0.6217-1.6042	0.995521	519	0.99892
C20_3_CE	0.9	0.5789-1.3874	0.623112	1	0.621-1.6079	0.997653	520	0.99892
C58_9_TAG	0.95	0.5918-1.5265	0.833444	1	0.5987-1.6688	0.998601	521	0.99892
NMMA	1.08	0.6818-1.6979	0.753119	1	0.6114-1.6368	0.99892	522	0.99892

## Sheet: Model 2A
Metabolite	OR	95% CI	P-value	Q-value
C3_DC_CARNITINE	3.24	1.6937-6.1822	0.000377753	0.149937
C38_4_PI	0.31	0.1628-0.6075	0.000574473	0.149937
C3_DC_CH3_CARNITINE	2.55	1.4402-4.5142	0.00132015	0.229707
C5_CARNITINE	2.34	1.3263-4.1215	0.00332153	0.358063
C14_0_SM	0.44	0.2508-0.7704	0.00409395	0.358063
C16_1_SM	0.39	0.2052-0.7421	0.00411566	0.358063
URACIL	2.09	1.2309-3.5567	0.00638321	0.476005
PYRUVIC_ACID	2.13	1.1962-3.7913	0.0102088	0.50968
C34_0_PC	0.48	0.2727-0.8533	0.0122396	0.50968
C36_0_PC	0.48	0.2706-0.8542	0.0125143	0.50968
_21_DEOXYCORTISOL	0.57	0.3709-0.8883	0.0127185	0.50968
C22_1_MAG__NH4	0.37	0.1657-0.8078	0.0128453	0.50968
C22_1_SM	0.46	0.2535-0.85	0.012907	0.50968
_3_METHOXYTYRAMINE	1.7	1.1156-2.6041	0.0136696	0.50968
A_KETOGLUTARIC_ACID	1.78	1.1078-2.8754	0.0172689	0.551391
MALIC_ACID	1.87	1.1137-3.1384	0.0179146	0.551391
PUTATIVE_URIDINE_PSEUDOURIDINE_3	3.37	1.2292-9.2232	0.0182101	0.551391
CYCLIC_AMP	0.44	0.2139-0.8845	0.0215149	0.551391
_2_HYDROXYGLUTARIC_ACID	1.76	1.0863-2.8498	0.0216493	0.551391
C38_2_PE	0.51	0.2858-0.9074	0.0220332	0.551391
C36_2_PC	0.52	0.2988-0.9159	0.0233741	0.551391
C22_0_LPE	0.49	0.2634-0.909	0.0236953	0.551391
C18_0_CE__NH4	0.53	0.3018-0.9202	0.024295	0.551391
N_ACETYL_L_ASPARTIC_ACID	1.91	1.0818-3.357	0.0255935	0.555486
C4_CARNITINE	1.77	1.0674-2.9194	0.0268223	0.555486
C52_0_TAG__NH4	0.52	0.2891-0.9338	0.0285959	0.555486
LINEOYL_ETHANOLAMIDE	0.54	0.3142-0.9439	0.0303278	0.555486
CHOLINE	2.01	1.0681-3.7679	0.0303982	0.555486
C22_6_LPE	0.53	0.2969-0.9431	0.0308603	0.555486
C20_0_SM	0.55	0.3183-0.9584	0.034767	0.570064
C5_DC_CARNITINE	1.72	1.0312-2.8589	0.0376956	0.570064
C36_1_PS_PLASMALOGEN	0.56	0.3187-0.9696	0.038573	0.570064
C24_0_CERAMIDE__D18_1_	0.57	0.3391-0.9714	0.0386378	0.570064
GLUTAMATE	2.1	1.029-4.27	0.041486	0.570064
C52_0_TAG	0.54	0.2986-0.9775	0.0418409	0.570064
C40_10_PC	0.55	0.3037-0.9828	0.0436125	0.570064
S_ADENOSYL_L_HOMOCYSTEINE	1.58	1.012-2.4731	0.0441655	0.570064
C40_9_PC	0.53	0.2823-0.9865	0.0452337	0.570064
C34_0_PS	0.54	0.297-0.9874	0.0453618	0.570064
C38_6_PC	0.52	0.2747-0.9873	0.0455877	0.570064
PUTATIVE_URIDINE_PSEUDOURIDINE_2	4.69	1.0075-21.8017	0.0488922	0.570064
QUINOLINIC_ACID	1.65	1.0006-2.7278	0.049732	0.570064
C36_0_DAG__NH4	0.6	0.3619-1.0068	0.0531192	0.570064
C18_0_LPC	0.54	0.2931-1.0106	0.0540243	0.570064
C20_5_CE__NH4	0.58	0.3275-1.0097	0.05407	0.570064
SPHINGOSINE_ISOMER1	0.6	0.3539-1.0092	0.0541545	0.570064
C32_2_PC	0.56	0.308-1.0105	0.0541611	0.570064
LPE_SOURCE_FRAGMENT	1.68	0.9898-2.8417	0.0546403	0.570064
C36_0_PE	0.58	0.3287-1.0142	0.0560097	0.570064
C5_1_CARNITINE	1.66	0.984-2.7883	0.057513	0.570064
HYPOXANTHINE	1.74	0.9818-3.095	0.057789	0.570064
C34_2_PC	0.57	0.3222-1.0197	0.0582919	0.570064
C22_0_CERAMIDE__D18_1_	0.59	0.3415-1.0195	0.058669	0.570064
C20_4_LPE	0.57	0.3213-1.0218	0.0591868	0.570064
C34_4_PC	0.56	0.3054-1.0249	0.0600643	0.570064
N6_ACETYLLYSINE	1.67	0.9714-2.8761	0.0635525	0.579548
ALLANTOIN	1.77	0.9668-3.2531	0.0642033	0.579548
ECTOINE	1.65	0.9705-2.8074	0.0643943	0.579548
PANTOTHENIC_ACID	1.63	0.9688-2.7378	0.0656836	0.581133
C50_0_TAG	0.59	0.3309-1.0385	0.0671723	0.584399
_6_8_DIHYDROXYPURINE	1.53	0.9673-2.4225	0.0690271	0.590691
CREATININE	1.73	0.9496-3.1511	0.0732733	0.593626
RIBOTHYMIDINE	0.62	0.3646-1.0507	0.0755976	0.593626
C36_4_PC_B	0.6	0.3455-1.0543	0.0760148	0.593626
N_ALPHA_ACETYLARGININE	1.63	0.947-2.8162	0.0776824	0.593626
DIMETHYLGLYCINE	1.7	0.9411-3.0715	0.0785956	0.593626
C34_0_PE	0.6	0.3399-1.0605	0.078791	0.593626
PYROGLUTAMIC_ACID	1.5	0.9524-2.3666	0.0801472	0.593626
C16_0_SM	0.6	0.336-1.0644	0.0804923	0.593626
C40_6_PC	0.58	0.3124-1.0699	0.0810311	0.593626
C18_0_LPE	0.62	0.3603-1.067	0.0843982	0.593626
C18_0_CE	0.63	0.367-1.0684	0.0859089	0.593626
C50_0_TAG__NH4	0.6	0.3395-1.0748	0.0864353	0.593626
C36_1_PC	0.63	0.3674-1.0694	0.0865861	0.593626
URIC_ACID	1.5	0.941-2.3922	0.088311	0.593626
C30_0_PC	0.61	0.3445-1.0836	0.0919314	0.593626
OXALOACETIC_ACID	1.59	0.9224-2.7335	0.0952027	0.593626
C34_0_DAG__NH4	0.62	0.3512-1.0935	0.0986545	0.593626
C38_4_PC	0.63	0.355-1.1065	0.107202	0.593626
C7_CARNITINE	1.54	0.9085-2.6112	0.108772	0.593626
C54_7_TAG__NH4	0.64	0.3746-1.1035	0.10903	0.593626
_2__3__O_METHYLADENOSINE	1.83	0.872-3.8316	0.110189	0.593626
SPHINGOSINE_ISOMER2	0.64	0.3727-1.1082	0.111747	0.593626
C16_0_CE__NH4	0.62	0.3397-1.1224	0.11383	0.593626
C48_3_TAG__NH4	0.64	0.3699-1.1135	0.114659	0.593626
C50_6_TAG	0.65	0.3735-1.1159	0.117069	0.593626
C49_3_TAG__NH4	0.65	0.3829-1.1139	0.117779	0.593626
_1_METHYLHISTAMINE	1.51	0.8995-2.5476	0.118492	0.593626
C20_0_LPE	0.61	0.3302-1.14	0.122243	0.593626
C52_1_TAG__NH4	0.64	0.3576-1.1323	0.124207	0.593626
C54_1_TAG__NH4	0.62	0.3393-1.141	0.125095	0.593626
DMGV	1.52	0.8897-2.5867	0.125831	0.593626
C18_2_CE__NH4	0.64	0.3602-1.1367	0.127779	0.593626
C9_CARNITINE	1.58	0.8764-2.8349	0.128651	0.593626
C42_0_TAG	0.67	0.4028-1.1223	0.128873	0.593626
C54_1_TAG	0.63	0.3404-1.1483	0.129948	0.593626
C34_2_PC_PLASMALOGEN	0.64	0.3533-1.1436	0.130511	0.593626
C50_5_TAG__NH4	0.66	0.3892-1.1303	0.131128	0.593626
C48_4_TAG	0.66	0.3836-1.1344	0.132566	0.593626
C48_5_TAG	0.66	0.388-1.1365	0.135348	0.593626
C52_6_TAG__NH4	0.66	0.3872-1.1372	0.135649	0.593626
C50_1_TAG__NH4	0.65	0.3621-1.1508	0.137894	0.593626
C22_0_SM	0.66	0.3807-1.1438	0.138521	0.593626
C48_4_TAG__NH4	0.67	0.3901-1.1399	0.138543	0.593626
C22_1_MAG	0.56	0.2614-1.2103	0.141103	0.593626
C46_2_TAG__NH4	0.67	0.3934-1.1422	0.14128	0.593626
C22_5_CE__NH4	0.66	0.3767-1.1501	0.14187	0.593626
C52_7_TAG	0.67	0.3988-1.1408	0.141942	0.593626
C10_2_CARNITINE	1.48	0.8756-2.5162	0.142463	0.593626
C48_3_TAG	0.67	0.386-1.148	0.143301	0.593626
C48_2_TAG__NH4	0.66	0.3829-1.1508	0.144403	0.593626
C18_2_LPE	0.67	0.3913-1.1476	0.144729	0.593626
C52_1_TAG	0.65	0.3635-1.162	0.146103	0.593626
_2_AMINOOCTANOIC_ACID	1.47	0.8732-2.4844	0.146606	0.593626
C50_5_TAG	0.68	0.398-1.1483	0.147512	0.593626
C46_1_TAG__NH4	0.66	0.3803-1.1574	0.148397	0.593626
C50_6_TAG__NH4	0.69	0.4151-1.143	0.149084	0.593626
C38_2_PC	0.67	0.3884-1.1556	0.149894	0.593626
GLUTAMIC_ACID	1.6	0.8434-3.0286	0.150457	0.593626
OLEOYL_LEUCINE	0.66	0.3791-1.1609	0.150609	0.593626
C50_4_TAG__NH4	0.67	0.3886-1.157	0.151007	0.593626
C34_1_PC	0.67	0.3841-1.16	0.151723	0.593626
N_ACETYL_L_GLUTAMIC_ACID	1.44	0.874-2.3716	0.152347	0.593626
GLYOXYLIC_ACID	0.63	0.3302-1.1898	0.153133	0.593626
C18_1_SM	0.67	0.3801-1.1643	0.153535	0.593626
C46_2_TAG	0.68	0.3994-1.1591	0.156492	0.593626
TRIMETHYLAMINE_N_OXIDE	1.45	0.8664-2.4364	0.15672	0.593626
C44_1_TAG	0.68	0.4008-1.1607	0.158365	0.593626
C42_0_TAG__NH4	0.69	0.4063-1.1586	0.158785	0.593626
C16_1_LPC_PLASMALOGEN	0.66	0.3645-1.1835	0.161723	0.593626
C44_2_TAG	0.68	0.4-1.1663	0.162576	0.593626
HYDROXYPROLINE	0.68	0.396-1.1709	0.164638	0.593626
C48_0_TAG__NH4	0.67	0.3774-1.1807	0.164815	0.593626
C24_0_SM	0.68	0.3975-1.1708	0.165189	0.593626
CARNITINE	1.47	0.8513-2.552	0.165965	0.593626
C14_0_LPC	0.69	0.4062-1.1678	0.166269	0.593626
PUTATIVE_N_ACETYLORNITHINE_1	1.51	0.8388-2.7313	0.168689	0.593626
C20_5_LPC	0.66	0.3619-1.196	0.169724	0.593626
C50_3_TAG__NH4	0.68	0.3898-1.1817	0.170714	0.593626
C18_1_CE__NH4	0.66	0.3697-1.193	0.170858	0.593626
C18_0_SM	0.68	0.3859-1.1841	0.170923	0.593626
C38_5_DAG__NH4	0.69	0.4004-1.1786	0.172762	0.593626
_3_METHYLHISTAMINE	1.44	0.8524-2.4253	0.173408	0.593626
C20_3_LPC	0.68	0.3941-1.1834	0.173915	0.593626
C44_1_TAG__NH4	0.7	0.4192-1.1759	0.178859	0.593626
C16_0_LPC	0.69	0.3967-1.1885	0.179265	0.593626
C44_0_TAG__NH4	0.71	0.4291-1.1745	0.182269	0.593626
C38_3_PC	0.69	0.3983-1.1929	0.183605	0.593626
C18_1_LPE	0.7	0.4189-1.1826	0.184667	0.593626
C44_0_TAG	0.7	0.4193-1.1826	0.184805	0.593626
C34_3_PC	0.68	0.3859-1.2028	0.185698	0.593626
N_LAUROYLGLYCINE	0.63	0.3161-1.2509	0.186102	0.593626
C49_2_TAG__NH4	0.7	0.4071-1.1911	0.186327	0.593626
C54_6_TAG__NH4	0.7	0.406-1.1938	0.188125	0.593626
C41_0_TAG__NH4	0.73	0.4531-1.171	0.190786	0.593626
C47_2_TAG__NH4	0.72	0.4382-1.179	0.190973	0.593626
C16_OH_CARNITINE	1.4	0.8454-2.3119	0.191631	0.593626
C32_0_DAG__NH4	0.7	0.404-1.1996	0.192049	0.593626
C46_3_TAG	0.7	0.4093-1.1968	0.192347	0.593626
_1_METHYLADENOSINE	1.49	0.8166-2.7171	0.193795	0.593626
SPERMIDINE	0.65	0.3342-1.2494	0.194258	0.593626
C48_2_TAG	0.7	0.4145-1.1961	0.194417	0.593626
C12_1_CARNITINE	1.48	0.8181-2.6799	0.194781	0.593626
C49_3_TAG	0.7	0.4148-1.1972	0.195522	0.593626
C52_5_TAG__NH4	0.71	0.4166-1.1966	0.195986	0.593626
C52_6_TAG	0.71	0.4182-1.1961	0.196317	0.593626
C48_0_TAG	0.69	0.3983-1.2089	0.196953	0.593626
C43_0_TAG__NH4	0.71	0.4161-1.2003	0.198995	0.593626
C22_6_LPC	0.68	0.3837-1.2212	0.199371	0.593626
C16_0_CERAMIDE__D18_1_	0.71	0.4159-1.2021	0.200544	0.593626
C32_0_PE	0.73	0.4546-1.1809	0.20155	0.593626
C46_3_TAG__NH4	0.71	0.4223-1.1998	0.201897	0.593626
C44_2_TAG__NH4	0.73	0.447-1.1868	0.203191	0.593626
C22_6_CE__NH4	0.68	0.3814-1.2279	0.203499	0.593626
_1_METHYLHISTIDINE	1.4	0.8324-2.3456	0.205508	0.593626
URATE	1.49	0.8013-2.776	0.20729	0.593626
SPHINGANINE	0.71	0.423-1.2066	0.208547	0.593626
C48_1_TAG__NH4	0.7	0.4069-1.2175	0.209129	0.593626
C54_7_TAG	0.71	0.4112-1.2168	0.210964	0.593626
C48_5_TAG__NH4	0.73	0.4442-1.1963	0.210987	0.593626
C49_0_TAG__NH4	0.69	0.3915-1.2307	0.211506	0.593626
C50_4_TAG	0.71	0.4159-1.2161	0.213081	0.593626
C6_CARNITINE	1.43	0.8127-2.5187	0.214449	0.593626
C50_2_TAG__NH4	0.7	0.4007-1.2293	0.215708	0.593626
CORTISOL	0.76	0.485-1.1781	0.216438	0.593626
C16_0_LPE	0.71	0.4099-1.2261	0.218438	0.593626
C30_1_PC	0.71	0.4167-1.2227	0.219536	0.593626
PUTATIVE_HIPPURATE	1.42	0.8105-2.4875	0.220327	0.593626
C49_1_TAG__NH4	0.71	0.4037-1.2329	0.220568	0.593626
C22_4_CE__NH4	0.73	0.4471-1.2052	0.221655	0.593626
C32_0_DAG	0.71	0.4096-1.2302	0.221916	0.593626
ALDOSTERONE	0.81	0.5727-1.1389	0.223086	0.593626
C47_1_TAG__NH4	0.73	0.4385-1.2147	0.225621	0.593626
XANTHINE	1.34	0.8328-2.1713	0.225668	0.593626
C46_1_TAG	0.72	0.417-1.2297	0.226097	0.593626
C46_0_TAG__NH4	0.72	0.4196-1.232	0.229876	0.593626
C34_3_DAG__NH4	0.72	0.4202-1.2324	0.230664	0.593626
C50_3_TAG	0.71	0.4062-1.243	0.231061	0.593626
C53_3_TAG__NH4	0.7	0.3975-1.2496	0.231142	0.593626
AMINOISOBUTYRIC_ACID	1.43	0.7941-2.592	0.231706	0.593626
C55_2_TAG__NH4	0.72	0.4123-1.2407	0.233037	0.593626
C8_CARNITINE	1.43	0.7925-2.5949	0.233449	0.593626
C40_6_PS	0.73	0.4284-1.2297	0.233537	0.593626
C32_1_PC	0.71	0.405-1.2468	0.233654	0.593626
C58_10_TAG__NH4	0.71	0.4048-1.2489	0.235366	0.593626
C41_0_TAG	0.72	0.4126-1.2467	0.238711	0.593626
C52_7_TAG__NH4	0.74	0.4453-1.2237	0.239119	0.593626
C53_2_TAG__NH4	0.71	0.4038-1.2542	0.239356	0.593626
METHYLTHIOADENOSINE	1.76	0.6868-4.4923	0.239703	0.593626
C47_2_TAG	0.73	0.4345-1.232	0.23982	0.593626
KYNURENINE	1.25	0.8635-1.7972	0.239952	0.593626
C50_1_TAG	0.71	0.406-1.2567	0.243037	0.59425
C32_2_DAG__NH4	0.69	0.3728-1.2853	0.243982	0.59425
ANSERINE	1.35	0.8137-2.2482	0.244151	0.59425
C45_3_TAG	0.76	0.4764-1.2083	0.244758	0.59425
C36_1_DAG	0.71	0.3978-1.2681	0.247286	0.597306
C38_4_DAG_2	0.74	0.4403-1.2363	0.248305	0.597306
FUMARIC_ACID	1.33	0.8179-2.1585	0.250981	0.597478
C36_1_DAG__NH4	0.72	0.4055-1.2667	0.251621	0.597478
C32_0_PC	0.72	0.4106-1.2628	0.25181	0.597478
C56_8_TAG__NH4	0.73	0.4273-1.2513	0.253413	0.59856
C38_5_DAG	0.73	0.4215-1.2571	0.254643	0.598754
C45_0_TAG__NH4	0.72	0.4148-1.2642	0.256202	0.59972
C34_3_PC_PLASMALOGEN	0.74	0.4291-1.263	0.266042	0.619972
C43_1_TAG__NH4	0.75	0.4545-1.2454	0.268505	0.6221
C20_4_CE__NH4	0.73	0.4206-1.2735	0.269338	0.6221
C36_1_PE	0.73	0.419-1.2784	0.272679	0.627042
C43_1_TAG	0.79	0.5259-1.2002	0.27435	0.627347
PHYTOSPHINGOSINE	0.7	0.3669-1.3309	0.275597	0.627347
NIACINAMIDE	0.73	0.4186-1.2828	0.276417	0.627347
C53_2_TAG	0.73	0.417-1.2859	0.278107	0.627649
C18_2_CARNITINE	1.4	0.7609-2.5768	0.279377	0.627649
C47_0_TAG	0.76	0.4703-1.2441	0.280158	0.627649
C20_5_CE	0.73	0.415-1.293	0.282941	0.627971
C55_3_TAG__NH4	0.73	0.4149-1.2933	0.283101	0.627971
C58_11_TAG__NH4	0.74	0.4187-1.2907	0.28391	0.627971
C48_1_TAG	0.75	0.4436-1.273	0.288028	0.633535
C43_0_TAG	0.73	0.4067-1.3091	0.290541	0.633535
C18_1_CARNITINE	1.37	0.763-2.4646	0.291153	0.633535
ACONITIC_ACID	1.33	0.7823-2.2621	0.292039	0.633535
C46_4_TAG	0.76	0.4533-1.2691	0.292494	0.633535
C36_0_DAG	0.75	0.4404-1.2823	0.294695	0.635664
C56_10_TAG	0.76	0.4497-1.2768	0.297415	0.637659
XANTHOSINE	1.32	0.7809-2.2365	0.298947	0.637659
SUCCINIC_ACID_METHYLMALONIC_ACID	1.38	0.7519-2.5211	0.300232	0.637659
C45_2_TAG	0.79	0.501-1.2379	0.300654	0.637659
TAUROCHOLIC_ACID	1.32	0.7772-2.2556	0.301727	0.637659
C51_0_TAG__NH4	0.82	0.5525-1.2036	0.304395	0.640702
C54_8_TAG	0.77	0.458-1.2795	0.307903	0.643223
C38_7_PE_PLASMALOGEN	0.72	0.3862-1.3537	0.310865	0.643223
_3_HYDROXYANTHRANILIC_ACID	0.75	0.4235-1.3154	0.311709	0.643223
C56_1_TAG__NH4	0.81	0.5372-1.2194	0.311772	0.643223
C56_9_TAG__NH4	0.76	0.453-1.2886	0.312797	0.643223
C50_2_TAG	0.75	0.4349-1.3062	0.313529	0.643223
C38_6_PS	0.78	0.4727-1.2738	0.315892	0.643223
CITRULLINE	1.29	0.7811-2.1451	0.316679	0.643223
C46_0_TAG	0.76	0.4419-1.3041	0.318191	0.643223
C52_2_TAG__NH4	0.74	0.4172-1.3289	0.318361	0.643223
C10_CARNITINE	1.35	0.7465-2.4512	0.319147	0.643223
N_CARBAMOYL_BETA_ALANINE	1.31	0.7692-2.2206	0.322356	0.646485
C32_1_DAG__NH4	0.77	0.4557-1.2959	0.323243	0.646485
_5_HYDROXYMETHYL_4_METHYLURACIL	1.65	0.6069-4.4898	0.326191	0.649488
C18_1_OH_CARNITINE	1.28	0.7833-2.0804	0.327233	0.649488
C49_0_TAG	0.75	0.419-1.3429	0.33321	0.657105
_1_METHYLNICOTINAMIDE	0.79	0.4898-1.274	0.333588	0.657105
C45_1_TAG__NH4	0.77	0.4593-1.3041	0.335706	0.657335
PUTATIVE_1_METHYLGUANOSINE	1.31	0.7537-2.2875	0.336223	0.657335
C18_1_LPC_PLASMALOGEN	1.34	0.7338-2.4575	0.339004	0.658383
C36_5_PC_PLASMALOGEN_A	0.75	0.4146-1.3544	0.339282	0.658383
C34_1_DAG__NH4	0.76	0.4287-1.3437	0.343956	0.659748
HIPPURIC_ACID	1.21	0.8141-1.8019	0.34458	0.659748
METHIONINE	0.79	0.4926-1.281	0.344965	0.659748
GLUTATHIONE_REDUCED	1.34	0.7323-2.4376	0.345041	0.659748
PUTATIVE_2_METHYLGUANOSINE	1.31	0.7494-2.2751	0.346315	0.659769
C43_2_TAG	0.74	0.3956-1.3888	0.349961	0.661666
C4_OH_CARNITINE	1.25	0.784-1.9851	0.350769	0.661666
PHENYLALANINE	1.28	0.7595-2.1652	0.35196	0.661666
C34_3_DAG	0.76	0.4294-1.3526	0.353312	0.661666
PHOSPHOCHOLINE	0.76	0.4255-1.3581	0.35435	0.661666
C49_2_TAG	0.77	0.4448-1.3373	0.354917	0.661666
LACTIC_ACID	1.21	0.8047-1.8186	0.359971	0.664384
CREATINE	1.3	0.7379-2.2975	0.362284	0.664384
C32_1_DAG	0.78	0.4554-1.3344	0.363751	0.664384
C45_2_TAG__NH4	0.74	0.382-1.4233	0.363882	0.664384
C45_1_TAG	0.81	0.5185-1.2733	0.365044	0.664384
PC_SOURCE_FRAGMENT	1.28	0.7525-2.1662	0.365121	0.664384
OROTIC_ACID	1.21	0.8013-1.8257	0.365284	0.664384
C46_4_TAG__NH4	0.79	0.4822-1.3108	0.368493	0.665988
C36_2_PS_PLASMALOGEN	0.78	0.4586-1.3356	0.368717	0.665988
C34_2_DAG__NH4	0.77	0.4418-1.3572	0.371743	0.666416
OLEOYL_GLYCINE	0.79	0.4751-1.3212	0.372139	0.666416
C3_CARNITINE	1.28	0.7469-2.1785	0.372785	0.666416
C55_2_TAG	0.77	0.4288-1.3764	0.375501	0.668981
C54_4_TAG	1.3	0.7245-2.3331	0.379058	0.673021
C12_CARNITINE	1.3	0.7191-2.3679	0.381348	0.674791
C24_1_CERAMIDE__D18_1_	0.79	0.4646-1.3458	0.386828	0.679372
C54_2_TAG__NH4	0.77	0.4305-1.387	0.387597	0.679372
C56_9_TAG	0.78	0.4469-1.3672	0.387841	0.679372
C52_3_TAG__NH4	0.78	0.4359-1.3821	0.389385	0.679796
PYRROLIDONECARBOXYLIC_ACID	1.31	0.7033-2.4475	0.393293	0.682884
C24_1_SM	0.77	0.4201-1.4069	0.39377	0.682884
C18_3_CE__NH4	0.78	0.4397-1.3888	0.400673	0.687169
C58_11_TAG	0.79	0.4606-1.3652	0.402684	0.687169
INDOLE_3_LACTIC_ACID	0.81	0.491-1.3326	0.405003	0.687169
C36_3_DAG__NH4	0.79	0.4497-1.3814	0.405655	0.687169
PSEUDOURIDINE	0.95	0.8536-1.0662	0.406322	0.687169
GABA	1.26	0.7318-2.1604	0.40688	0.687169
C16_1_CE__NH4	0.78	0.429-1.4094	0.407104	0.687169
C18_2_LPC	0.79	0.4507-1.382	0.407548	0.687169
INDOXYL_SULFATE	1.24	0.7433-2.0748	0.408089	0.687169
GLYCERIC_ACID	1.23	0.7545-1.9937	0.410214	0.688526
C47_1_TAG	0.81	0.49-1.3409	0.413523	0.690701
ADENOSINE	1.29	0.6991-2.3851	0.414156	0.690701
C14_0_CE__NH4	0.81	0.4772-1.3605	0.418994	0.694504
C49_1_TAG	0.8	0.4699-1.3693	0.419097	0.694504
C56_1_TAG	0.79	0.4476-1.403	0.424776	0.701687
SEROTONIN	1.18	0.7821-1.7872	0.427053	0.703222
C34_1_DAG	0.8	0.4518-1.4074	0.434828	0.713774
C52_2_TAG	0.8	0.4582-1.4011	0.437114	0.715278
GUANIDOACETIC_ACID	0.8	0.4485-1.4187	0.441559	0.719691
C36_2_DAG__NH4	0.81	0.4716-1.3888	0.442568	0.719691
C56_7_TAG__NH4	0.81	0.477-1.3878	0.448947	0.727797
C20_4_LPC	0.81	0.4559-1.4275	0.460692	0.742969
UROCANIC_ACID	1.25	0.6886-2.2748	0.461754	0.742969
C38_7_PC_PLASMALOGEN	0.79	0.424-1.4787	0.463871	0.742969
C54_6_TAG	0.81	0.4585-1.4303	0.46734	0.742969
C14_2_CARNITINE	1.25	0.6864-2.2677	0.46802	0.742969
C36_5_PC_PLASMALOGEN_B	0.82	0.4786-1.4033	0.468342	0.742969
C40_7_PC_PLASMALOGEN	1.22	0.7115-2.0927	0.469646	0.742969
C14_1_CARNITINE	1.24	0.689-2.2435	0.469693	0.742969
PUTATIVE_SPHINGOSINE	1.2	0.7264-1.9931	0.472434	0.743182
C54_2_TAG	0.8	0.4427-1.4632	0.476496	0.743182
C32_2_DAG	0.83	0.4866-1.4003	0.476771	0.743182
C36_4_DAG__NH4	0.81	0.4517-1.45	0.477023	0.743182
ACETYLGLYCINE	0.8	0.4375-1.4724	0.477479	0.743182
PUTATIVE_N_ACETYLORNITHINE_2	1.19	0.732-1.9456	0.47837	0.743182
LEUCINE	1.25	0.6751-2.3018	0.481129	0.745251
P_METHYLHIPPURIC_ACID	1.25	0.664-2.3687	0.485237	0.749386
KYNURENIC_ACID	1.22	0.6984-2.1257	0.48667	0.749386
BETAINE	1.25	0.6661-2.3373	0.489455	0.749944
C54_9_TAG	0.85	0.5378-1.346	0.489942	0.749944
C56_4_TAG__NH4	0.84	0.5009-1.3948	0.492479	0.749944
METHIONINE_SULFOXIDE	1.19	0.7275-1.9363	0.492779	0.749944
PROLINE	1.21	0.7036-2.0645	0.496671	0.753669
C36_2_PE	0.83	0.48-1.4318	0.501248	0.75841
OLEOYL_SERINE	0.83	0.4846-1.4275	0.503807	0.760079
C58_7_TAG	1.19	0.7088-2.011	0.505385	0.760204
C26_CARNITINE	0.82	0.4448-1.4959	0.510314	0.760204
C36_2_DAG	0.83	0.4842-1.4344	0.510543	0.760204
C20_4_CARNITINE	1.22	0.6736-2.2122	0.510902	0.760204
C16_1_LPC	0.84	0.4981-1.4149	0.511172	0.760204
ASPARTIC_ACID	0.83	0.4718-1.4568	0.514456	0.760565
C36_3_PC_PLASMALOGEN	0.83	0.4803-1.4439	0.514559	0.760565
C36_3_PC	0.85	0.5123-1.399	0.515785	0.760565
C56_2_TAG__NH4	0.84	0.4914-1.4307	0.51812	0.760831
ISOLEUCINE	1.21	0.6721-2.1962	0.519191	0.760831
_5_MTHF	1.22	0.6666-2.2265	0.520976	0.760831
C54_8_TAG__NH4	0.85	0.5097-1.4076	0.521796	0.760831
ALPHA_GLYCEROPHOSPHOCHOLINE	1.19	0.6915-2.0579	0.526109	0.764982
C56_6_TAG__NH4	0.84	0.483-1.4556	0.531349	0.770456
THYROXINE	1.19	0.6836-2.0847	0.533584	0.771125
C18_0_MAG	0.83	0.4707-1.4786	0.534765	0.771125
INDOLE_3_CARBOXYLIC_ACID	1.07	0.8639-1.3207	0.542775	0.773918
C18_1_LPC	0.85	0.5012-1.4382	0.542845	0.773918
C2_CARNITINE	1.18	0.6974-1.9828	0.543114	0.773918
IMIDAZOLEACETIC_ACID	0.84	0.4714-1.4861	0.543627	0.773918
ORNITHINE	1.2	0.6645-2.1699	0.544459	0.773918
ASPARTATE	1.21	0.6562-2.2149	0.546956	0.773918
GLYCINE	1.19	0.6768-2.0888	0.54708	0.773918
GLN_SOURCE_FRAGMENT	1.19	0.676-2.0845	0.550518	0.774115
URIDINE	1.19	0.6743-2.0928	0.551048	0.774115
N_ACETYL_L_ALANINE	0.97	0.8801-1.0706	0.551668	0.774115
C58_9_TAG__NH4	0.84	0.4792-1.4878	0.558196	0.781176
C44_13_PE_PLASMALOGEN	0.86	0.5239-1.4196	0.56038	0.781466
C56_8_TAG	0.84	0.4774-1.4938	0.561398	0.781466
C36_3_PS_PLASMALOGEN	1.17	0.6777-2.0368	0.565799	0.784013
C38_4_PE	0.85	0.4789-1.4962	0.566232	0.784013
C56_6_TAG	1.17	0.6815-2.0061	0.570185	0.785165
BETA_ALANINE	1.17	0.6863-1.9778	0.571468	0.785165
C30_0_DAG	0.85	0.4959-1.4731	0.571926	0.785165
_3_HYDROXYBUTYRIC_ACID	0.86	0.5042-1.4607	0.57308	0.785165
GLUTAMINE	1.17	0.6728-2.0421	0.574815	0.78548
C36_3_DAG	0.85	0.4769-1.51	0.576631	0.785905
PUTRESCINE	1.15	0.6983-1.8937	0.583124	0.791493
SPHINGOSINE	0.87	0.5319-1.4279	0.585089	0.791493
_1_5_AG___1_DEOXYGLUCOSE	1.03	0.9185-1.1616	0.588426	0.791493
DEOXYCHOLIC_ACID	1.16	0.681-1.9678	0.588657	0.791493
ACETOACETIC_ACID	1.15	0.6972-1.8857	0.589885	0.791493
VALINE	1.18	0.643-2.1668	0.592588	0.791493
TAURINE	1.19	0.6264-2.2677	0.592876	0.791493
C34_0_DAG	0.88	0.535-1.4317	0.595477	0.791493
C30_0_DAG__NH4	0.85	0.4685-1.545	0.595583	0.791493
ASPARAGINE	1.17	0.6528-2.1019	0.595894	0.791493
GLYCOCHOLIC_ACID	1.15	0.6841-1.931	0.599091	0.79372
C34_2_DAG	0.86	0.4868-1.5176	0.601689	0.794284
ACETYLCHOLINE	1.14	0.6881-1.9023	0.603835	0.794284
N_ACETYLPUTRESCINE	1.14	0.6974-1.8583	0.604082	0.794284
C20_3_CE__NH4	0.87	0.5086-1.4834	0.605995	0.794797
C20_CARNITINE	0.88	0.531-1.4492	0.609158	0.796944
C58_10_TAG	0.86	0.4898-1.5228	0.612405	0.797608
THIAMINE	1.15	0.6775-1.9355	0.612722	0.797608
C14_0_CE	0.87	0.5068-1.5	0.620328	0.798102
C22_5_CE	0.87	0.5102-1.495	0.621546	0.798102
C38_4_DAG_1	0.87	0.5036-1.5069	0.621711	0.798102
HYDROXYPHENYLPYRUVIC_ACID	1.1	0.7583-1.5878	0.622531	0.798102
C58_8_TAG	1.14	0.6692-1.9556	0.622972	0.798102
HISTIDINE	0.89	0.5594-1.4164	0.623276	0.798102
INDOLE_3_PROPANOIC_ACID	0.87	0.4999-1.5156	0.623804	0.798102
C56_5_TAG	1.15	0.6599-1.9924	0.627284	0.800593
C56_5_TAG__NH4	0.87	0.5024-1.522	0.635135	0.808322
C56_4_TAG	1.13	0.6743-1.9051	0.636438	0.808322
C36_1_PC_PLASMALOGEN	1.13	0.6695-1.9188	0.640961	0.812091
C45_0_TAG	0.88	0.5118-1.5194	0.650609	0.822319
ALANINE	1.13	0.6659-1.9142	0.652371	0.822527
PUTATIVE_URIDINE_PSEUDOURIDINE_1	0.79	0.2855-2.1966	0.653925	0.822527
C34_1_PC_PLASMALOGEN_A	1.13	0.6503-1.9791	0.656733	0.824073
PIPECOLIC_ACID	0.9	0.5666-1.4326	0.659293	0.825302
C36_1_PE_PLASMALOGEN	1.11	0.6959-1.7613	0.667664	0.833782
C36_2_PC_PLASMALOGEN	1.12	0.6697-1.8659	0.670018	0.834725
C18_3_CE	1.13	0.637-1.997	0.679815	0.83893
C58_6_TAG__NH4	0.89	0.5168-1.5391	0.680983	0.83893
C36_4_PE_PLASMALOGEN	1.11	0.683-1.7921	0.681255	0.83893
C34_2_PE_PLASMALOGEN	0.89	0.5237-1.5262	0.681378	0.83893
MYRISTOLEIC_ACID	1.12	0.6523-1.9226	0.68143	0.83893
C38_6_PC_PLASMALOGEN	0.89	0.4949-1.5882	0.685617	0.842098
SERINE	0.9	0.5274-1.5288	0.691707	0.847584
C60_12_TAG	0.89	0.499-1.5903	0.695889	0.850712
N_ACETYL_L_GLUTAMINE	0.97	0.8048-1.1581	0.704833	0.859633
C38_3_PE_PLASMALOGEN	0.9	0.5146-1.5691	0.706877	0.8597
C36_4_DAG	0.89	0.4959-1.6104	0.708182	0.8597
C36_5_PE_PLASMALOGEN	0.9	0.5187-1.565	0.711242	0.861411
C60_12_TAG__NH4	0.9	0.5017-1.6097	0.719289	0.869141
GLYCOCHENODEOXYCHOLIC_ACID	1.1	0.6435-1.889	0.722417	0.870904
TYROSINE	0.91	0.5243-1.5721	0.730044	0.878072
C38_5_PE	0.91	0.5308-1.5624	0.734003	0.880803
C20_3_CE	1.09	0.6437-1.855	0.742599	0.889075
PHENYLACETYLGLYCINE	1.1	0.6173-1.9558	0.74883	0.893108
C22_6_CE	0.91	0.505-1.635	0.74939	0.893108
C56_3_TAG__NH4	0.92	0.5433-1.5563	0.754616	0.896516
_2_HYDROXYBUTYRIC_ACID	1.09	0.6412-1.8443	0.755684	0.896516
CITRIC_ACID_ISOCITRIC_ACID	1.11	0.5632-2.1955	0.759826	0.899386
C58_8_TAG__NH4	0.92	0.5349-1.5808	0.761551	0.899389
C38_6_PE_PLASMALOGEN	0.92	0.5295-1.5948	0.763617	0.899792
TAURODEOXYCHOLIC_ACID___TAUROCHE	1.08	0.6511-1.79	0.766754	0.901454
ADMA	1.08	0.6287-1.87	0.770935	0.904333
C54_5_TAG	0.93	0.5451-1.574	0.777243	0.908999
PTERIN	0.92	0.5325-1.6031	0.778396	0.908999
_3_AMINOISOBUTYRIC_ACID	1.08	0.6079-1.936	0.782877	0.912192
D_GLUCONIC_ACID	1.03	0.8441-1.2495	0.789985	0.917021
C20_4_CE	1.07	0.6506-1.7555	0.792946	0.917021
C54_3_TAG__NH4	0.93	0.5228-1.6422	0.793957	0.917021
C18_1_CE	1.08	0.6094-1.9055	0.797097	0.917021
N_ACETYLTRYPTOPHAN	1.06	0.6672-1.6932	0.797287	0.917021
ACETAMINOPHEN	0.94	0.5862-1.5075	0.797562	0.917021
TRYPTOPHAN	0.93	0.5465-1.5953	0.801705	0.919437
_2_AMINOADIPIC_ACID	1.08	0.6032-1.9187	0.804438	0.919437
C36_3_PE	1.07	0.6229-1.8402	0.804948	0.919437
C42_11_PE_PLASMALOGEN	1.06	0.6473-1.7479	0.807575	0.920424
COTININE	0.89	0.3418-2.315	0.810345	0.920818
C36_3_PE_PLASMALOGEN	1.07	0.6298-1.8047	0.811648	0.920818
C54_3_TAG	1.07	0.5986-1.9228	0.813213	0.920818
OLEOYL_PHENYLALANINE	0.94	0.5458-1.6141	0.818851	0.925195
C58_9_TAG	1.06	0.6124-1.8521	0.823567	0.92587
C38_6_PE	0.94	0.54-1.6337	0.824369	0.92587
C40_6_PE	0.96	0.6417-1.4241	0.824769	0.92587
S_ADENOSYLMETHIONINE	0.94	0.5317-1.6567	0.826775	0.92613
C18_0_MAG__NH4	1.06	0.61-1.8379	0.838914	0.937715
C34_5_PC_PLASMALOGEN	0.95	0.5627-1.5977	0.841631	0.937922
UDP_GLCNAC	1.06	0.5733-1.9766	0.843012	0.937922
C14_CARNITINE	0.95	0.5431-1.6515	0.847981	0.937922
C18_2_SM	0.95	0.5613-1.6077	0.848348	0.937922
HOMOCYSTEINE	0.95	0.5859-1.5545	0.851107	0.937922
PROLINE_BETAINE	0.95	0.5318-1.6881	0.854618	0.937922
THREONINE	0.95	0.5657-1.6048	0.85576	0.937922
C36_4_PE	0.95	0.5646-1.6078	0.856176	0.937922
C34_2_PE	0.96	0.5876-1.5555	0.856443	0.937922
_2_KETOISOVALERIC_ACID_KIV	0.98	0.8296-1.1689	0.860273	0.937922
C16_1_CE	1.05	0.5827-1.9062	0.862149	0.937922
C16_CARNITINE	0.95	0.5012-1.7853	0.863765	0.937922
SPHINGOSINE_ISOMER3	1.05	0.5921-1.8674	0.863879	0.937922
_1_2_4_TRIMETHYLBENZENE	1.05	0.6147-1.7838	0.86538	0.937922
LYSINE	0.96	0.5764-1.5898	0.866051	0.937922
C16_0_CE	1.04	0.6132-1.7773	0.874055	0.943047
_3_DEHYDROXYCARNITINE	0.95	0.5081-1.7795	0.874932	0.943047
C56_2_TAG	0.96	0.5663-1.6247	0.876903	0.943047
SDMA	1.05	0.5919-1.8471	0.878009	0.943047
BILIRUBIN	0.96	0.5244-1.7405	0.881466	0.944815
C47_0_TAG__NH4	0.97	0.6301-1.4897	0.885194	0.946868
GUANINE	0.96	0.525-1.7482	0.888794	0.948774
INOSINE	1.04	0.5863-1.8448	0.893297	0.949925
C18_CARNITINE	0.96	0.5281-1.7453	0.893512	0.949925
C18_2_CE	1.03	0.5977-1.786	0.906805	0.962098
C58_6_TAG	0.97	0.5779-1.6321	0.9121	0.964467
CYTOSINE	1.03	0.5956-1.7852	0.912733	0.964467
PUTATIVE_3_AMINOISOBUTYRIC_ACID	1.02	0.6693-1.5646	0.915139	0.965056
C36_2_PE_PLASMALOGEN	0.97	0.5745-1.6479	0.918868	0.965371
C22_4_CE	1.02	0.6356-1.6519	0.920235	0.965371
C38_4_PC_PLASMALOGEN	1.03	0.5911-1.7892	0.920986	0.965371
ARACHINDONOYL_PHENYLALANINE	1.02	0.6439-1.6194	0.929013	0.970136
XANTHURENIC_ACID	1.02	0.63-1.6584	0.929249	0.970136
C56_7_TAG	1.02	0.5922-1.7668	0.935246	0.973793
C54_4_TAG__NH4	0.98	0.5491-1.7379	0.936483	0.973793
C52_3_TAG	0.98	0.5573-1.7238	0.944413	0.979585
_5_HYDROXYTRYPTOPHAN	1.02	0.5217-2.0082	0.946106	0.979585
GLUCOSE_FRUCTOSE_GALACTOSE_WATER	1.02	0.5588-1.8631	0.947683	0.979585
PHOSPHOCREATINE	1.02	0.5546-1.8718	0.951947	0.982049
C40_7_PE_PLASMALOGEN	1.02	0.5638-1.832	0.95719	0.985047
ARGININE	0.99	0.5837-1.6681	0.960285	0.985047
ATP	1	0.8841-1.1383	0.960515	0.985047
C55_3_TAG	1.01	0.5769-1.7744	0.967362	0.985207
CARNOSINE	0.99	0.5845-1.6744	0.968066	0.985207
C38_5_PE_PLASMALOGEN	0.99	0.5797-1.6905	0.970426	0.985207
C56_3_TAG	1.01	0.601-1.6956	0.971496	0.985207
GUANOSINE	1.01	0.5596-1.8232	0.973414	0.985207
C34_3_PE_PLASMALOGEN	0.99	0.6049-1.6266	0.974248	0.985207
C34_1_PC_PLASMALOGEN_B	0.99	0.5742-1.7121	0.975537	0.985207
C53_3_TAG	0.99	0.546-1.7981	0.97577	0.985207
C34_4_PC_PLASMALOGEN	1.01	0.6241-1.6221	0.97983	0.987396
C16_1_MAG	0.99	0.5704-1.7329	0.983605	0.989291
C52_4_TAG	1	0.5718-1.7644	0.987654	0.991085
NMMA	1	0.5969-1.6874	0.989186	0.991085
HISTAMINE	1	0.5988-1.6614	0.992078	0.992078

## Sheet: Models 2B and 2C
	Model 2B			Model 2C
Metabolite	OR	95% CI	P-value	OR	95% CI	P-value	P-interaction for median time on study
C38_4_PI	0.32	0.1302-0.7684	0.0110292	0.19	0.0671-0.5192	0.00129881	0.45063
C3_DC_CH3_CARNITINE	2.67	1.1092-6.4145	0.02841	3.62	1.539-8.525	0.00320704	0.626458
C16_1_SM	0.24	0.0954-0.6042	0.00244652	0.37	0.1466-0.9242	0.0333536	0.51515
C14_0_SM	0.4	0.1768-0.8887	0.0246775	0.28	0.1204-0.6704	0.00406713	0.553057
C5_CARNITINE	2.9	1.2598-6.6606	0.0122898	1.98	0.8714-4.4978	0.102841	0.522302
C34_0_PC	0.4	0.1666-0.9453	0.0368769	0.27	0.1127-0.6346	0.00277888	0.529359
C3_DC_CARNITINE	1.32	0.5895-2.9454	0.501371	3.56	1.3823-9.177	0.00852678	0.117454
C36_0_PC	0.34	0.1397-0.8137	0.0155779	0.31	0.134-0.7335	0.00748455	0.882429
C22_1_SM	0.33	0.1358-0.8213	0.0169059	0.41	0.1726-0.9657	0.0414028	0.732635
C36_1_PS_PLASMALOGEN	0.47	0.2142-1.0341	0.0605993	0.27	0.1044-0.6885	0.00622926	0.376492
URACIL	1.15	0.5611-2.3564	0.70288	4.75	1.7895-12.5841	0.0017504	0.0216687
GLUTAMATE	3.58	1.2334-10.3696	0.018962	1.57	0.5492-4.4942	0.399552	0.280159
C36_4_PC_B	0.41	0.1632-1.0451	0.0619294	0.54	0.2634-1.1047	0.0914461	0.645368
CYCLIC_AMP	0.73	0.2975-1.7828	0.487491	0.11	0.0298-0.4149	0.001077	0.0198259
MALIC_ACID	1.64	0.7546-3.5726	0.211297	2.15	0.96-4.7976	0.062813	0.635225
_3_METHOXYTYRAMINE	1.36	0.7674-2.4101	0.292324	2.49	1.2622-4.9293	0.0085377	0.182699
C34_4_PC	0.69	0.284-1.6952	0.422622	0.3	0.1228-0.7346	0.00839354	0.196545
C20_0_SM	0.46	0.1968-1.064	0.0693794	0.44	0.2021-0.9696	0.0416253	0.939706
C18_0_CE__NH4	0.37	0.1661-0.8253	0.0151173	0.5	0.2229-1.1267	0.0946426	0.604576
C36_0_PE	0.62	0.2836-1.3586	0.232738	0.31	0.1253-0.7529	0.00986948	0.253833
C34_0_PS	0.29	0.1026-0.801	0.0171631	0.5	0.2276-1.1123	0.0896746	0.410807
N6_ACETYLLYSINE	2.01	0.8982-4.4783	0.0895007	2.03	0.9531-4.3169	0.0664426	0.985958
C22_1_MAG__NH4	0.41	0.1387-1.1881	0.0998874	0.33	0.1039-1.0444	0.0592745	0.787235
C22_6_LPE	0.38	0.1511-0.9365	0.0356351	0.51	0.2336-1.1095	0.089388	0.630667
C40_9_PC	0.38	0.1436-1.0325	0.0578894	0.38	0.1598-0.9027	0.0283984	1
C38_6_PC	0.4	0.1466-1.1153	0.0802608	0.35	0.1465-0.8555	0.0210735	0.845667
C30_0_PC	0.82	0.3671-1.8501	0.639142	0.27	0.1057-0.6802	0.00558564	0.0774388
SPHINGOSINE_ISOMER1	0.39	0.1579-0.9706	0.0429173	0.61	0.305-1.2277	0.166792	0.443542
C22_0_LPE	0.35	0.1395-0.8859	0.026632	0.41	0.173-0.9682	0.0419901	0.80607
C32_2_PC	1.12	0.4888-2.5843	0.78336	0.17	0.0604-0.4561	0.000497588	0.00477928
C40_10_PC	0.36	0.1393-0.945	0.0379164	0.46	0.2097-0.9881	0.0465503	0.696491
PUTATIVE_URIDINE_PSEUDOURIDINE_3	1.91	0.4212-8.6421	0.401892	4.11	1.0475-16.148	0.0427142	0.461085
C24_0_CERAMIDE__D18_1_	0.57	0.266-1.2098	0.142358	0.42	0.1922-0.9217	0.030468	0.582902
C38_4_PC	0.35	0.1338-0.9078	0.0309294	0.63	0.2981-1.3255	0.222576	0.342517
C16_0_SM	0.4	0.1772-0.9242	0.0317941	0.5	0.2202-1.1452	0.10148	0.707801
HYPOXANTHINE	1.21	0.5766-2.5441	0.612836	3.46	1.4013-8.5449	0.00711353	0.0783001
S_ADENOSYL_L_HOMOCYSTEINE	1.77	0.9572-3.2861	0.0686179	2.02	0.8538-4.8004	0.109323	0.807186
CREATININE	1.96	0.8214-4.6785	0.12933	1.86	0.7822-4.4024	0.160735	0.933277
N_ACETYL_L_ASPARTIC_ACID	1.63	0.7338-3.6025	0.231126	2.17	0.9062-5.1784	0.0821378	0.634582
C36_2_PC	0.85	0.3654-1.9688	0.701518	0.31	0.1396-0.7082	0.00522475	0.0910235
QUINOLINIC_ACID	2.8	1.1766-6.648	0.0198991	1.53	0.7452-3.1598	0.245285	0.293481
_2_HYDROXYGLUTARIC_ACID	1.61	0.7858-3.3185	0.192224	2.5	1.1037-5.6628	0.0280506	0.42862
C36_1_PC	0.62	0.2904-1.3314	0.221311	0.41	0.1855-0.9205	0.0305539	0.463243
C34_0_PE	0.88	0.4049-1.9072	0.743705	0.21	0.0775-0.5702	0.00218852	0.0262261
_21_DEOXYCORTISOL	0.5	0.2259-1.094	0.0824476	0.67	0.3847-1.1697	0.159276	0.552233
C38_2_PE	0.94	0.4278-2.0871	0.888537	0.25	0.1048-0.6094	0.00219346	0.0283962
ECTOINE	2.23	0.991-5.0089	0.0525995	1.48	0.7005-3.1217	0.304799	0.465942
PYRUVIC_ACID	2.15	0.9492-4.8611	0.0665255	1.31	0.5619-3.0615	0.530485	0.409389
C16_0_CE__NH4	0.19	0.0662-0.5331	0.00167756	0.62	0.2752-1.3946	0.247418	0.079403
LPE_SOURCE_FRAGMENT	2.12	0.9748-4.6139	0.0580204	1.69	0.785-3.6264	0.180233	0.683747
C18_1_CE__NH4	0.27	0.1087-0.6782	0.00524753	0.7	0.2969-1.6369	0.407486	0.135749
C4_CARNITINE	1.76	0.8308-3.7132	0.140299	1.79	0.8763-3.6665	0.109978	0.974482
C18_0_LPC	0.27	0.1009-0.7256	0.00939893	0.55	0.2308-1.2978	0.171203	0.287437
C34_1_PC	0.66	0.3087-1.4111	0.283837	0.43	0.187-0.9794	0.0445055	0.454894
C34_2_PC_PLASMALOGEN	0.69	0.3008-1.5811	0.380079	0.35	0.1447-0.8557	0.0212473	0.27384
N_ALPHA_ACETYLARGININE	1.27	0.6379-2.5294	0.496161	2.83	1.1527-6.9278	0.0231728	0.164858
LINEOYL_ETHANOLAMIDE	0.61	0.2583-1.4384	0.258426	0.56	0.2684-1.1803	0.12819	0.882469
A_KETOGLUTARIC_ACID	1.37	0.7254-2.5854	0.332213	2.27	0.9221-5.6003	0.0744671	0.369694
C20_5_CE__NH4	0.29	0.1091-0.7487	0.0108079	0.58	0.2625-1.2727	0.173457	0.275245
C22_5_CE__NH4	0.25	0.0981-0.6346	0.00356126	0.72	0.3215-1.5999	0.416814	0.0921221
C16_1_LPC_PLASMALOGEN	0.2	0.0724-0.5587	0.00209508	0.83	0.3721-1.8397	0.642114	0.0315213
SPHINGOSINE_ISOMER2	0.47	0.1886-1.1716	0.10521	0.59	0.2791-1.2458	0.166323	0.705765
C18_0_LPE	0.4	0.175-0.9357	0.0343912	0.63	0.2992-1.3288	0.225291	0.427377
DMGV	1.63	0.7811-3.4207	0.19215	1.82	0.8031-4.1329	0.151186	0.84465
DIMETHYLGLYCINE	1.75	0.7504-4.0661	0.195679	1.33	0.5797-3.055	0.500316	0.649914
C34_2_PC	1.07	0.465-2.4569	0.875408	0.25	0.1027-0.6181	0.00260565	0.019897
C24_0_SM	0.44	0.1814-1.0865	0.0753474	0.53	0.2475-1.1407	0.104752	0.75658
C40_6_PC	0.44	0.1722-1.1159	0.0836278	0.41	0.1729-0.9677	0.0418694	0.913259
PUTATIVE_URIDINE_PSEUDOURIDINE_2	3.3	0.3515-30.9562	0.296101	3.38	0.4063-28.1498	0.259734	0.98785
C36_0_DAG__NH4	0.6	0.2716-1.3188	0.202867	0.6	0.2984-1.1966	0.146109	1
C18_0_CE	0.35	0.161-0.7748	0.00941096	0.69	0.3256-1.4715	0.339044	0.221851
C20_4_LPE	0.46	0.1975-1.0854	0.0764893	0.7	0.3203-1.5275	0.369728	0.476484
URIC_ACID	1.77	0.9203-3.4056	0.0870323	2.01	0.8329-4.8745	0.120115	0.820649
C32_0_PC	0.68	0.3051-1.5177	0.346937	0.42	0.1827-0.9632	0.0405275	0.413607
C22_0_SM	0.53	0.2285-1.209	0.130148	0.51	0.2298-1.1504	0.105448	0.948118
C52_0_TAG__NH4	0.8	0.3349-1.9004	0.609892	0.41	0.1791-0.9254	0.0319529	0.272857
C20_4_CE__NH4	0.27	0.1017-0.7092	0.0079634	0.88	0.413-1.8694	0.736925	0.0597404
RIBOTHYMIDINE	0.51	0.2524-1.0176	0.0560019	0.68	0.2644-1.7647	0.431149	0.632075
_2__3__O_METHYLADENOSINE	1.6	0.607-4.215	0.342061	1.66	0.5364-5.1081	0.380671	0.961276
ANSERINE	3.15	1.3627-7.274	0.0072691	0.9	0.4559-1.7687	0.755707	0.0226647
CHOLINE	1.51	0.6022-3.7614	0.381685	1.73	0.7183-4.1691	0.221574	0.833702
C14_0_LPC	0.79	0.3587-1.7515	0.56555	0.39	0.1709-0.888	0.0249328	0.226301
C34_3_PC_PLASMALOGEN	0.69	0.3078-1.5586	0.374768	0.5	0.2375-1.0388	0.0630275	0.56478
C52_0_TAG	0.71	0.298-1.6802	0.433098	0.48	0.2055-1.1062	0.0845326	0.524872
C22_0_CERAMIDE__D18_1_	0.69	0.3275-1.4594	0.33289	0.45	0.1979-1.0128	0.053667	0.449018
C50_6_TAG	0.81	0.3512-1.8668	0.62041	0.4	0.1884-0.8545	0.0179039	0.219633
N_ACETYL_L_GLUTAMIC_ACID	2.1	1.0399-4.2535	0.0385496	1.17	0.5281-2.6134	0.692933	0.281943
C18_2_CE__NH4	0.47	0.205-1.0837	0.0766011	0.56	0.2488-1.2478	0.155071	0.767001
PANTOTHENIC_ACID	1.34	0.659-2.7384	0.416685	1.94	0.9094-4.1295	0.0865366	0.485189
C5_1_CARNITINE	1.21	0.5387-2.7347	0.640166	1.91	0.918-3.9839	0.0833846	0.413772
C38_2_PC	0.8	0.368-1.7334	0.569567	0.41	0.1875-0.8991	0.0260141	0.234553
C5_DC_CARNITINE	1.66	0.833-3.3129	0.149531	1.37	0.648-2.8866	0.411393	0.711371
C54_7_TAG__NH4	0.61	0.271-1.3877	0.24056	0.54	0.2695-1.0982	0.0894102	0.82448
C16_0_LPC	0.4	0.1672-0.9566	0.0394369	0.66	0.3013-1.4391	0.294917	0.402023
C20_3_LPC	0.4	0.1677-0.9676	0.0419879	0.65	0.2989-1.4302	0.287334	0.418013
C30_1_PC	1.05	0.501-2.1903	0.901814	0.32	0.1304-0.7898	0.0133739	0.0454313
ALLANTOIN	1.11	0.4682-2.6327	0.812348	2.3	0.9126-5.783	0.0774067	0.258613
C50_0_TAG	0.69	0.301-1.5962	0.389148	0.52	0.2311-1.1746	0.115962	0.634077
PYROGLUTAMIC_ACID	0.78	0.3205-1.9132	0.591527	5.12	1.913-13.6965	0.00114699	0.00552701
C54_4_TAG	3.51	1.3673-9.0248	0.00905999	0.98	0.4439-2.1421	0.950003	0.0418306
C18_1_SM	0.41	0.1948-0.8766	0.0212623	0.9	0.389-2.08	0.804428	0.171194
_6_8_DIHYDROXYPURINE	1.23	0.6562-2.2893	0.52326	1.43	0.6843-2.9867	0.341646	0.759843
C38_5_DAG__NH4	0.68	0.3103-1.4849	0.331976	0.62	0.3076-1.2633	0.189741	0.863659
C18_0_SM	0.45	0.2119-0.9503	0.036326	0.76	0.3234-1.7711	0.520671	0.365029
GLUTAMIC_ACID	2.61	1.0314-6.5984	0.0428453	0.91	0.334-2.4965	0.859519	0.131263
C32_0_PE	1.19	0.616-2.3076	0.601713	0.21	0.0763-0.5621	0.00199704	0.00451119
C50_6_TAG__NH4	0.76	0.3462-1.6649	0.491673	0.48	0.2368-0.972	0.0414651	0.393708
C48_5_TAG	0.9	0.3956-2.0397	0.797595	0.38	0.1719-0.8188	0.0138194	0.135499
C52_7_TAG	0.72	0.3202-1.6371	0.437915	0.52	0.2621-1.036	0.0629942	0.549882
C32_1_PC	0.86	0.4063-1.8037	0.682733	0.48	0.2049-1.1198	0.0893546	0.311718
C36_5_PC_PLASMALOGEN_B	0.61	0.2811-1.3215	0.209864	0.7	0.3374-1.4695	0.35009	0.800568
C9_CARNITINE	2.51	1.0591-5.9324	0.0365611	0.95	0.4135-2.1754	0.90055	0.111453
C42_0_TAG	0.73	0.3505-1.52	0.400219	0.47	0.208-1.0583	0.0682405	0.430762
C22_6_CE__NH4	0.29	0.1076-0.7942	0.0158742	0.7	0.321-1.5393	0.378044	0.173894
_1_METHYLHISTAMINE	0.66	0.3201-1.358	0.25846	3.84	1.6032-9.2081	0.0025415	0.00233789
_3_METHYLHISTAMINE	0.98	0.4233-2.2793	0.966726	2.14	1.0429-4.3718	0.037997	0.166137
C22_4_CE__NH4	0.55	0.2933-1.0448	0.0680286	0.8	0.3963-1.6065	0.527189	0.437125
C10_2_CARNITINE	1.65	0.7079-3.8552	0.245651	1.39	0.6504-2.9772	0.394442	0.76788
C16_0_LPE	0.55	0.243-1.2325	0.14558	0.66	0.3055-1.4301	0.293071	0.749714
C50_5_TAG__NH4	0.94	0.423-2.0726	0.871173	0.41	0.196-0.8638	0.0189228	0.134596
C40_6_PS	0.98	0.4644-2.0518	0.949284	0.43	0.19-0.9746	0.0432183	0.143828
C38_7_PE_PLASMALOGEN	0.73	0.2846-1.8769	0.514705	0.38	0.1467-0.9634	0.0415787	0.336827
C48_3_TAG__NH4	1.04	0.4587-2.3465	0.929665	0.33	0.1452-0.7619	0.00924303	0.0530939
C50_0_TAG__NH4	0.8	0.3448-1.8491	0.599431	0.51	0.2246-1.1434	0.101605	0.450477
C41_0_TAG__NH4	0.69	0.3262-1.4456	0.322325	0.66	0.3412-1.2741	0.215251	0.930155
C54_7_TAG	0.53	0.2273-1.2239	0.136362	0.69	0.3445-1.3949	0.304373	0.636559
SPERMIDINE	0.58	0.2304-1.4404	0.238224	0.76	0.2684-2.1362	0.599208	0.701887
C48_4_TAG__NH4	0.96	0.4229-2.1741	0.91981	0.36	0.1614-0.7968	0.011811	0.0927185
C41_0_TAG	0.73	0.3128-1.7054	0.467765	0.49	0.2132-1.1443	0.0998524	0.512766
C46_2_TAG__NH4	0.98	0.4486-2.1252	0.952049	0.35	0.1534-0.8012	0.0129403	0.0753794
C49_3_TAG__NH4	1.07	0.4951-2.3187	0.860986	0.35	0.1566-0.7743	0.00967251	0.0486996
C48_4_TAG	0.98	0.4264-2.2666	0.96806	0.36	0.1592-0.798	0.0121126	0.0908383
PHENYLALANINE	2.48	1.0587-5.8168	0.036515	0.87	0.4026-1.8784	0.722244	0.0737943
C34_3_PC	1.01	0.4662-2.2051	0.972161	0.37	0.1591-0.8725	0.0229492	0.0876096
C20_0_LPE	0.48	0.1998-1.1451	0.0977702	0.61	0.2479-1.4921	0.277484	0.707506
C36_5_PC_PLASMALOGEN_A	0.87	0.3742-2.0121	0.74088	0.44	0.1869-1.0541	0.0656887	0.268068
_1_METHYLHISTIDINE	1.54	0.6317-3.7596	0.341881	1.43	0.7357-2.7826	0.291127	0.896126
C52_6_TAG__NH4	0.86	0.3818-1.9405	0.717734	0.47	0.2306-0.9706	0.041212	0.27507
C44_1_TAG	0.93	0.4262-2.0097	0.844859	0.39	0.171-0.898	0.0268157	0.133535
C34_0_DAG__NH4	0.8	0.362-1.7896	0.594466	0.54	0.2395-1.2129	0.13526	0.498662
C46_1_TAG__NH4	0.94	0.4231-2.1095	0.889736	0.38	0.1601-0.8793	0.0240687	0.129443
C56_10_TAG	0.4	0.1598-1.022	0.0556147	0.81	0.4129-1.5884	0.539542	0.227761
_1_METHYLADENOSINE	2.49	0.9848-6.2928	0.0538984	1.18	0.5109-2.7239	0.698726	0.24129
C50_5_TAG	0.95	0.4248-2.1073	0.892192	0.44	0.2105-0.908	0.0264957	0.164083
C44_2_TAG	0.96	0.4396-2.1069	0.923622	0.37	0.1611-0.8579	0.0203878	0.102954
C44_0_TAG__NH4	0.88	0.4334-1.783	0.720883	0.44	0.2015-0.9743	0.0428966	0.199441
C44_1_TAG__NH4	0.93	0.4438-1.9364	0.840146	0.4	0.1776-0.9082	0.0284247	0.132489
XANTHINE	0.88	0.4544-1.6928	0.695709	1.89	0.8333-4.295	0.127494	0.154012
C47_2_TAG__NH4	1.03	0.5212-2.038	0.930907	0.36	0.1639-0.8076	0.0129475	0.049546
C54_6_TAG__NH4	0.75	0.339-1.6398	0.46531	0.57	0.2788-1.1536	0.117434	0.612126
C38_4_DAG_2	0.8	0.3567-1.7768	0.577819	0.68	0.347-1.3511	0.274751	0.762028
C16_OH_CARNITINE	1.26	0.5827-2.7421	0.553195	1.67	0.82-3.4185	0.157052	0.600098
ALDOSTERONE	0.66	0.3257-1.3538	0.259907	0.84	0.5479-1.2919	0.429792	0.569718
C34_5_PC_PLASMALOGEN	0.67	0.3199-1.3944	0.282516	0.82	0.3998-1.7012	0.60186	0.701351
ACONITIC_ACID	0.85	0.3708-1.9407	0.696859	2.29	0.948-5.5204	0.0656048	0.108027
C58_10_TAG__NH4	0.5	0.2047-1.2438	0.137298	0.66	0.32-1.3738	0.268963	0.638881
C38_5_DAG	0.73	0.331-1.6029	0.430953	0.67	0.3284-1.36	0.266174	0.874177
C46_2_TAG	0.99	0.4522-2.1618	0.977314	0.36	0.1587-0.8366	0.0172773	0.0823692
C42_0_TAG__NH4	0.78	0.3517-1.714	0.531093	0.51	0.2325-1.1376	0.10063	0.457685
C43_0_TAG__NH4	0.75	0.3405-1.6605	0.480592	0.52	0.2317-1.1718	0.114909	0.526477
C48_3_TAG	1.06	0.4703-2.3689	0.895731	0.35	0.1523-0.807	0.0137411	0.0614582
C38_7_PC_PLASMALOGEN	0.64	0.2513-1.638	0.353406	0.54	0.2299-1.2584	0.15271	0.792411
C58_11_TAG__NH4	0.55	0.2205-1.3659	0.197122	0.66	0.3147-1.3738	0.26475	0.760507
C38_6_PS	1.06	0.5391-2.1038	0.856307	0.39	0.1669-0.9098	0.0293602	0.0715082
C48_2_TAG__NH4	1.03	0.4704-2.2633	0.937767	0.38	0.1661-0.8682	0.0217415	0.0866028
URATE	1.65	0.6713-4.0577	0.274963	1.61	0.6511-3.9879	0.302125	0.96995
C44_0_TAG	0.85	0.398-1.8013	0.665773	0.48	0.2185-1.0721	0.0736951	0.307044
C48_5_TAG__NH4	0.88	0.4152-1.856	0.733071	0.47	0.2307-0.9768	0.0430049	0.237125
C22_6_LPC	0.29	0.1102-0.7763	0.013566	0.96	0.4534-2.0506	0.924675	0.0572127
C22_1_MAG	0.68	0.2201-2.0738	0.493144	0.36	0.0951-1.386	0.138241	0.475547
C45_3_TAG	1.1	0.5821-2.0664	0.775159	0.41	0.186-0.8879	0.0239404	0.0545127
PUTATIVE_N_ACETYLORNITHINE_2	1.59	0.7371-3.4288	0.237094	1.27	0.6661-2.411	0.47034	0.660323
PHYTOSPHINGOSINE	0.44	0.1537-1.2425	0.120506	0.73	0.2869-1.8481	0.504349	0.478393
C18_3_CE__NH4	0.38	0.152-0.9745	0.043958	0.76	0.3484-1.641	0.479523	0.261429
C44_2_TAG__NH4	0.93	0.4564-1.8935	0.840692	0.45	0.2086-0.9683	0.0411261	0.173969
C36_3_PC_PLASMALOGEN	0.76	0.3607-1.6053	0.473177	0.64	0.2934-1.396	0.262052	0.755047
_5_HYDROXYMETHYL_4_METHYLURACIL	1.41	0.3601-5.4931	0.623637	2.27	0.4687-11.039	0.30782	0.654567
C46_3_TAG__NH4	1.04	0.4842-2.2375	0.91818	0.38	0.1709-0.8431	0.0173525	0.0743029
C7_CARNITINE	1.1	0.5029-2.3872	0.8181	1.55	0.7274-3.2818	0.257675	0.535011
C38_3_PC	0.65	0.2894-1.4418	0.286044	0.61	0.2942-1.259	0.180568	0.908495
CARNITINE	0.89	0.365-2.151	0.78912	2.1	0.9693-4.5288	0.0600151	0.152161
C48_0_TAG__NH4	0.84	0.3707-1.9137	0.681754	0.54	0.2395-1.231	0.143666	0.454989
C18_2_LPE	0.75	0.3262-1.7337	0.503717	0.64	0.3067-1.3551	0.246729	0.780935
C52_7_TAG__NH4	0.78	0.3552-1.7088	0.533241	0.58	0.2957-1.1325	0.110343	0.574138
C46_3_TAG	1.1	0.4942-2.4703	0.807909	0.36	0.1575-0.8111	0.0138617	0.0566127
C36_5_PE_PLASMALOGEN	0.77	0.3426-1.7185	0.519691	0.64	0.2935-1.3994	0.264175	0.746781
C58_11_TAG	0.42	0.1667-1.0503	0.0635405	0.83	0.4011-1.7348	0.627369	0.256282
ISOLEUCINE	2.38	1.0446-5.4044	0.0390177	0.79	0.3364-1.8745	0.598858	0.0690065
C20_5_CE	0.32	0.1288-0.7751	0.0118534	1.02	0.4301-2.4182	0.964327	0.0680627
C47_1_TAG__NH4	1.02	0.5149-2.017	0.956792	0.39	0.1677-0.8924	0.025942	0.080808
C24_1_SM	0.47	0.1929-1.1425	0.0956372	0.67	0.2809-1.619	0.377884	0.577716
C48_0_TAG	0.78	0.3505-1.7419	0.546418	0.61	0.2711-1.3592	0.224805	0.671691
C47_2_TAG	1.09	0.5264-2.2631	0.814125	0.37	0.16-0.8448	0.0184082	0.0556005
C50_4_TAG__NH4	1.06	0.4724-2.3872	0.884291	0.41	0.1932-0.8907	0.0240267	0.0945527
C52_1_TAG__NH4	0.91	0.4013-2.066	0.822597	0.5	0.2208-1.1379	0.0987261	0.311232
C43_1_TAG	0.92	0.4736-1.7724	0.794982	0.7	0.3885-1.2655	0.238589	0.545223
C50_1_TAG__NH4	1	0.4475-2.2222	0.994587	0.45	0.1932-1.0517	0.0652597	0.179558
C18_1_LPE	0.93	0.4204-2.045	0.851498	0.67	0.3283-1.3803	0.280001	0.547434
C45_2_TAG	1	0.5603-1.8005	0.988348	0.45	0.2047-0.9984	0.0495343	0.111747
SPHINGANINE	0.49	0.2203-1.0685	0.0725705	0.86	0.4017-1.8573	0.707661	0.316079
OXALOACETIC_ACID	1.64	0.7457-3.6282	0.217615	1.29	0.5962-2.777	0.520651	0.669819
C18_2_CARNITINE	0.74	0.2873-1.9234	0.540926	2.39	1.0042-5.6722	0.0488922	0.0739066
GLYOXYLIC_ACID	0.57	0.2309-1.4281	0.23272	0.73	0.2813-1.9022	0.52132	0.713421
C16_1_CE__NH4	0.73	0.3232-1.6555	0.45312	0.58	0.2367-1.4306	0.238115	0.710604
C48_2_TAG	1.08	0.5046-2.3004	0.847218	0.4	0.1761-0.9121	0.0293162	0.0818398
C46_1_TAG	1.01	0.461-2.2033	0.984293	0.42	0.1809-0.9702	0.042307	0.133977
C20_5_LPC	0.39	0.1389-1.0856	0.0713173	0.82	0.3833-1.7544	0.609063	0.254692
CREATINE	2.18	0.8957-5.3277	0.0858354	1.21	0.5497-2.6584	0.63709	0.33219
HYDROXYPROLINE	0.94	0.4055-2.164	0.878346	0.67	0.3177-1.4142	0.293671	0.554124
C52_6_TAG	0.84	0.3752-1.8857	0.674406	0.57	0.2851-1.124	0.103955	0.473097
OLEOYL_LEUCINE	1.07	0.5253-2.1861	0.849267	0.37	0.1429-0.9368	0.0360851	0.0777362
KYNURENINE	1.61	0.711-3.6247	0.254662	1.4	0.8798-2.2122	0.156932	0.769746
C48_1_TAG__NH4	1.05	0.4856-2.2559	0.907301	0.43	0.1887-0.9871	0.0465148	0.121107
C43_0_TAG	0.76	0.3162-1.8463	0.549911	0.57	0.2379-1.3839	0.216213	0.650992
PUTATIVE_N_ACETYLORNITHINE_1	1.19	0.5615-2.5147	0.651971	1.5	0.6459-3.4892	0.345068	0.687588
C18_1_CARNITINE	0.96	0.3607-2.5757	0.94146	2.26	1.011-5.0472	0.0469473	0.186321
C32_0_DAG__NH4	0.9	0.4273-1.9108	0.790706	0.56	0.2565-1.2234	0.145908	0.390143
C49_0_TAG__NH4	0.89	0.3855-2.0382	0.776574	0.5	0.2169-1.175	0.112756	0.340695
C43_1_TAG__NH4	0.95	0.4417-2.0527	0.900463	0.51	0.2365-1.0858	0.0804183	0.259829
C46_0_TAG__NH4	0.98	0.4547-2.1029	0.954269	0.48	0.2135-1.0795	0.0759212	0.209535
C49_3_TAG	1.32	0.6116-2.8391	0.48119	0.33	0.143-0.7606	0.00927134	0.0166357
C49_2_TAG__NH4	1.21	0.5708-2.5568	0.621131	0.35	0.1518-0.8125	0.014468	0.0306872
TRIMETHYLAMINE_N_OXIDE	1.37	0.6387-2.9263	0.42063	1.56	0.7712-3.1518	0.216242	0.806025
PUTATIVE_HIPPURATE	0.85	0.3731-1.9483	0.705184	2.49	1.0515-5.8888	0.0380516	0.0776133
C56_9_TAG__NH4	0.67	0.2959-1.5258	0.342019	0.65	0.3314-1.2863	0.217793	0.955487
C14_0_CE__NH4	0.9	0.4192-1.9533	0.799022	0.41	0.1763-0.9525	0.038159	0.177093
C54_9_TAG	0.38	0.1544-0.9276	0.0336542	0.92	0.5226-1.6247	0.777415	0.102336
C49_1_TAG__NH4	1.09	0.501-2.3917	0.820494	0.4	0.1662-0.9414	0.0360341	0.0923437
ASPARTATE	1.45	0.6117-3.447	0.397818	1.41	0.5906-3.3441	0.441672	0.96428
CITRULLINE	1.71	0.8112-3.6052	0.158543	1.13	0.5592-2.2752	0.736619	0.427803
C45_0_TAG__NH4	0.94	0.4254-2.0787	0.879247	0.51	0.2131-1.2112	0.126573	0.308334
BETAINE	1.21	0.513-2.8643	0.660962	1.54	0.6184-3.8554	0.352135	0.706597
IMIDAZOLEACETIC_ACID	0.44	0.1965-1.0049	0.0513945	1.21	0.5257-2.7749	0.656412	0.0888336
N_CARBAMOYL_BETA_ALANINE	1.43	0.619-3.3006	0.402809	1.5	0.7336-3.0784	0.265576	0.932267
C50_3_TAG__NH4	1.12	0.513-2.4601	0.771026	0.42	0.1878-0.9285	0.0321971	0.0858995
PHOSPHOCHOLINE	0.57	0.2564-1.2825	0.175676	0.79	0.326-1.9253	0.607133	0.593489
LEUCINE	2.04	0.8307-4.9914	0.120036	1.07	0.4535-2.5365	0.873282	0.308873
C20_4_LPC	0.37	0.1547-0.893	0.0268842	1.33	0.6166-2.8801	0.465249	0.0316727
C12_1_CARNITINE	1.24	0.5022-3.0468	0.643766	1.66	0.7231-3.7921	0.232873	0.640521
C52_1_TAG	0.93	0.4082-2.1223	0.864522	0.53	0.2295-1.2163	0.13369	0.347213
C16_0_CERAMIDE__D18_1_	0.65	0.3293-1.2792	0.211795	0.65	0.2801-1.4966	0.309197	1
C6_CARNITINE	1.21	0.4783-3.0363	0.692218	1.47	0.6917-3.1368	0.315293	0.74931
C46_4_TAG	1.06	0.4906-2.3107	0.873859	0.44	0.2068-0.9547	0.0376344	0.113448
C47_0_TAG	0.92	0.4587-1.8466	0.815342	0.65	0.3237-1.3055	0.226025	0.489584
C56_9_TAG	0.47	0.1861-1.1853	0.109584	0.81	0.3941-1.6847	0.580603	0.364598
C38_3_PE_PLASMALOGEN	0.85	0.3855-1.86	0.6787	0.7	0.3299-1.4966	0.360332	0.7273
OROTIC_ACID	0.93	0.5074-1.7173	0.82488	1.32	0.6827-2.553	0.408951	0.444689
C56_8_TAG__NH4	0.71	0.3122-1.5985	0.404221	0.64	0.3154-1.2848	0.20742	0.850177
TAUROCHOLIC_ACID	2.77	1.1876-6.4737	0.0184008	0.82	0.3767-1.766	0.605094	0.037522
C50_2_TAG__NH4	1.09	0.4951-2.3821	0.836824	0.48	0.2119-1.0706	0.0726838	0.154231
C45_1_TAG	1.04	0.5783-1.8795	0.889855	0.45	0.208-0.9817	0.0447749	0.0919445
C54_1_TAG	1.16	0.478-2.7927	0.74841	0.47	0.2-1.1112	0.0856123	0.150139
PYRROLIDONECARBOXYLIC_ACID	0.83	0.4221-1.628	0.585844	2.9	1.1284-7.4416	0.0270366	0.0344933
C32_0_DAG	0.94	0.436-2.0096	0.865338	0.58	0.2635-1.2881	0.181992	0.390234
C38_5_PE_PLASMALOGEN	0.75	0.3448-1.615	0.457457	0.83	0.4046-1.7168	0.621116	0.850995
C43_2_TAG	1.24	0.4977-3.0773	0.646431	0.41	0.1569-1.0681	0.0679448	0.10101
C54_8_TAG	0.79	0.3472-1.7848	0.566636	0.63	0.325-1.2347	0.17995	0.674494
C54_1_TAG__NH4	1.15	0.4761-2.7819	0.754971	0.49	0.2086-1.1362	0.0959802	0.171786
C34_2_PE_PLASMALOGEN	1.13	0.5201-2.4368	0.763684	0.56	0.2559-1.2184	0.143228	0.210046
METHIONINE_SULFOXIDE	2.27	0.988-5.2362	0.0534129	0.93	0.4906-1.7627	0.823687	0.0960283
C50_4_TAG	1.16	0.5153-2.6267	0.715667	0.45	0.2154-0.9602	0.0387794	0.0931199
C52_5_TAG__NH4	1.01	0.4493-2.2716	0.98022	0.53	0.2616-1.0594	0.0721419	0.237673
C46_0_TAG	1.01	0.4623-2.195	0.98531	0.54	0.2409-1.2197	0.138859	0.275085
VALINE	1.84	0.7693-4.4031	0.170473	0.95	0.3974-2.2553	0.901515	0.292399
C36_2_PS_PLASMALOGEN	0.99	0.4568-2.1294	0.97187	0.39	0.1731-0.8706	0.0216596	0.101722
C54_6_TAG	0.66	0.2749-1.5997	0.36051	0.77	0.3655-1.6077	0.481736	0.792875
N_LAUROYLGLYCINE	0.92	0.2339-3.6513	0.91047	0.68	0.2947-1.5745	0.369104	0.712757
C3_CARNITINE	0.88	0.3774-2.0572	0.769834	1.59	0.7652-3.2842	0.214982	0.299601
PC_SOURCE_FRAGMENT	2.15	0.9469-4.8656	0.0673563	1.02	0.4995-2.0935	0.951253	0.179059
C48_1_TAG	1.12	0.5301-2.3849	0.759959	0.47	0.2096-1.0507	0.0657931	0.12258
LACTIC_ACID	1.29	0.7205-2.3192	0.389284	1.65	0.7219-3.7754	0.234922	0.633866
C54_3_TAG	2.55	1.0352-6.2944	0.0418375	0.74	0.3345-1.6556	0.468897	0.0443242
NIACINAMIDE	0.71	0.3783-1.3271	0.281851	1.1	0.4455-2.6923	0.843002	0.433983
C45_1_TAG__NH4	1.13	0.5383-2.3793	0.744124	0.46	0.1996-1.0513	0.0654973	0.114001
C32_1_DAG__NH4	1.04	0.5065-2.1498	0.908031	0.53	0.2459-1.1614	0.113592	0.21288
C8_CARNITINE	1.44	0.5541-3.723	0.456219	1.4	0.6318-3.1184	0.405095	0.964562
C36_1_PE	1.51	0.6177-3.6913	0.366193	0.53	0.25-1.1223	0.097162	0.0787679
C49_0_TAG	1.01	0.4255-2.3768	0.989798	0.5	0.2141-1.1623	0.107077	0.25331
METHYLTHIOADENOSINE	1.72	0.4963-5.9771	0.391793	1.05	0.2851-3.8603	0.942556	0.591305
C38_6_PE_PLASMALOGEN	0.92	0.4199-2.005	0.829268	0.71	0.3288-1.537	0.385705	0.643702
C54_5_TAG	0.57	0.2467-1.3185	0.189068	0.96	0.4685-1.9561	0.904631	0.353548
C26_CARNITINE	0.79	0.3403-1.8312	0.581647	0.65	0.2764-1.5076	0.311821	0.748975
C34_3_DAG__NH4	1.02	0.4678-2.2049	0.968836	0.56	0.2688-1.1697	0.123022	0.27134
GLYCERIC_ACID	0.97	0.4162-2.2642	0.945154	2.52	0.8963-7.0965	0.0796574	0.161632
C51_0_TAG__NH4	0.81	0.4934-1.3321	0.407642	0.86	0.4567-1.6237	0.644134	0.884121
_5_MTHF	0.92	0.3836-2.209	0.852845	1.82	0.7427-4.4562	0.190425	0.285721
C36_1_DAG__NH4	0.98	0.4444-2.1403	0.950201	0.59	0.2591-1.3354	0.204589	0.381211
C46_4_TAG__NH4	1.07	0.5007-2.2755	0.865883	0.53	0.2522-1.0953	0.0859747	0.19166
_2_AMINOADIPIC_ACID	3.66	1.4296-9.3941	0.00684884	0.43	0.1783-1.027	0.0573872	0.0010947
C36_0_DAG	0.79	0.3487-1.776	0.563962	0.8	0.3966-1.6116	0.531497	0.981689
C47_1_TAG	1.11	0.5642-2.198	0.756536	0.47	0.2053-1.0585	0.0681286	0.113842
C14_0_CE	0.84	0.3694-1.8962	0.669708	0.57	0.255-1.2612	0.164242	0.506303
C53_2_TAG__NH4	1.35	0.5873-3.0963	0.480801	0.45	0.2014-1.0085	0.0524555	0.0628335
SEROTONIN	1.3	0.7276-2.3392	0.372099	1.13	0.5956-2.1384	0.710802	0.751013
C58_10_TAG	0.43	0.167-1.1286	0.0869369	0.96	0.4472-2.0738	0.923203	0.198854
C45_2_TAG__NH4	1.28	0.5012-3.2775	0.604488	0.39	0.1377-1.1204	0.0805772	0.097858
C54_8_TAG__NH4	0.85	0.3887-1.8689	0.690003	0.66	0.3408-1.2938	0.228956	0.630288
C49_1_TAG	1.08	0.5134-2.2754	0.837757	0.51	0.2212-1.1656	0.109921	0.187451
THIAMINE	1.38	0.6505-2.913	0.40333	1.23	0.6146-2.4618	0.558587	0.825244
C50_3_TAG	1.28	0.5687-2.8886	0.549474	0.45	0.1983-0.9999	0.0499558	0.0739434
C36_1_DAG	1.02	0.4555-2.2679	0.968407	0.59	0.2579-1.3571	0.215252	0.352808
C56_4_TAG	2.45	1.0992-5.4744	0.0284515	0.73	0.3524-1.5009	0.388938	0.0281919
FUMARIC_ACID	1.11	0.5077-2.4355	0.790751	1.42	0.6923-2.9276	0.336915	0.650381
C60_12_TAG	0.41	0.163-1.0384	0.0600866	1.09	0.4788-2.4776	0.838572	0.121623
C18_1_LPC_PLASMALOGEN	0.73	0.2993-1.7595	0.478051	2.12	0.8945-5.0449	0.0877406	0.0914192
METHIONINE	1.58	0.7184-3.469	0.255704	0.43	0.2001-0.9433	0.0350785	0.0209729
C4_OH_CARNITINE	1.08	0.5783-2.0137	0.81079	1.56	0.7573-3.21	0.227979	0.45008
ACETYLGLYCINE	0.61	0.2694-1.3842	0.237492	0.91	0.3656-2.2627	0.838355	0.522143
HIPPURIC_ACID	0.78	0.3369-1.8066	0.562286	2.57	1.0896-6.0803	0.0311139	0.0517997
C32_2_DAG__NH4	1.05	0.4278-2.5839	0.913121	0.51	0.2111-1.2302	0.133822	0.260948
CORTISOL	0.99	0.4719-2.0659	0.973186	0.7	0.3878-1.2476	0.223312	0.470535
C53_3_TAG__NH4	1.46	0.6161-3.4706	0.388841	0.44	0.2-0.9881	0.0466597	0.0457677
ORNITHINE	1.1	0.4939-2.4633	0.810948	1.42	0.5717-3.5492	0.447561	0.680683
C50_1_TAG	1.19	0.5415-2.6293	0.661244	0.51	0.2205-1.1787	0.115128	0.149354
C32_1_DAG	1.12	0.5306-2.3592	0.767997	0.54	0.2448-1.2007	0.131278	0.189716
C53_2_TAG	1.42	0.6083-3.2965	0.419615	0.45	0.202-1.008	0.0523181	0.0534319
C18_1_LPC	0.58	0.2481-1.3518	0.206612	0.99	0.485-2.0044	0.968919	0.343109
C50_2_TAG	1.16	0.5329-2.5287	0.707271	0.54	0.2421-1.1995	0.129941	0.179485
_2_AMINOOCTANOIC_ACID	1.75	0.8513-3.5898	0.128155	1.29	0.596-2.8132	0.513998	0.572161
_1_METHYLNICOTINAMIDE	0.73	0.4111-1.2949	0.281409	1.12	0.51-2.4569	0.778522	0.388648
PUTATIVE_URIDINE_PSEUDOURIDINE_1	0.31	0.0752-1.3142	0.112838	1.5	0.3018-7.4748	0.619374	0.150578
C36_2_PE_PLASMALOGEN	0.94	0.4449-1.9985	0.878127	0.76	0.3642-1.5702	0.453481	0.690936
C49_2_TAG	1.42	0.6414-3.1283	0.389095	0.39	0.167-0.9276	0.0330173	0.0300267
C55_3_TAG__NH4	1.72	0.7385-3.9862	0.209378	0.4	0.1755-0.9226	0.031528	0.0156522
XANTHOSINE	0.95	0.4761-1.9095	0.89301	1.68	0.712-3.9602	0.2364	0.311412
C10_CARNITINE	1.39	0.5398-3.5582	0.497568	1.39	0.6198-3.1028	0.426218	1
PSEUDOURIDINE	0.93	0.7681-1.1159	0.418576	1.92	0.8595-4.2989	0.111524	0.0855151
GLYCOCHOLIC_ACID	2.78	1.2461-6.2067	0.0125183	0.73	0.3392-1.5729	0.422163	0.0182555
C40_7_PE_PLASMALOGEN	0.82	0.3344-2.0306	0.673956	0.66	0.292-1.4726	0.306623	0.725472
GUANIDOACETIC_ACID	0.57	0.2396-1.3406	0.196149	0.99	0.4233-2.2932	0.972557	0.369682
C56_1_TAG__NH4	1.02	0.5368-1.9352	0.953503	0.72	0.4107-1.2581	0.247729	0.4225
C38_5_PE	1.39	0.6125-3.158	0.43041	0.56	0.2682-1.1825	0.129213	0.107098
OLEOYL_GLYCINE	0.74	0.364-1.5108	0.410287	0.98	0.4387-2.1978	0.964502	0.60853
C14_1_CARNITINE	1.02	0.4239-2.474	0.957928	1.55	0.6919-3.4905	0.285628	0.493223
C18_1_OH_CARNITINE	0.89	0.4008-1.9647	0.768316	1.73	0.8839-3.4036	0.10934	0.211307
THYROXINE	1.48	0.6664-3.3036	0.334003	1.38	0.6037-3.1519	0.445552	0.905127
C38_4_PE	1.25	0.4886-3.1886	0.643101	0.66	0.3199-1.3764	0.27054	0.292138
PROLINE	1.59	0.6811-3.6963	0.284648	0.81	0.3683-1.7728	0.594912	0.252138
C18_2_LPC	0.68	0.2704-1.7084	0.411517	0.89	0.423-1.8595	0.750583	0.655462
C18_0_MAG	0.75	0.3088-1.8013	0.51446	0.96	0.4007-2.3061	0.929426	0.696919
C56_7_TAG__NH4	0.9	0.417-1.9593	0.79792	0.65	0.3206-1.3235	0.235948	0.543287
ADENOSINE	0.75	0.3412-1.6324	0.463615	2.82	0.9654-8.2474	0.0579942	0.050575
C58_9_TAG__NH4	0.78	0.3332-1.8064	0.556122	0.69	0.3215-1.4879	0.345467	0.83315
C34_1_DAG__NH4	1.17	0.5348-2.57	0.691314	0.56	0.2449-1.2618	0.160339	0.20319
ACETOACETIC_ACID	1.08	0.5142-2.2655	0.840008	1.27	0.6282-2.5548	0.508653	0.755653
PUTATIVE_SPHINGOSINE	1.02	0.4221-2.4645	0.965046	1.24	0.6573-2.3466	0.504532	0.724899
C20_3_CE__NH4	0.32	0.1308-0.7941	0.0138508	1.17	0.5803-2.3411	0.666771	0.025815
C55_2_TAG__NH4	1.7	0.7427-3.9053	0.208574	0.4	0.1738-0.9147	0.0299618	0.0157049
SUCCINIC_ACID_METHYLMALONIC_ACID	0.61	0.202-1.8534	0.384937	2.77	0.9749-7.8558	0.055836	0.0513586
C38_6_PC_PLASMALOGEN	1.07	0.4799-2.3676	0.875398	0.73	0.3095-1.737	0.480742	0.523602
INDOLE_3_LACTIC_ACID	0.83	0.4023-1.7054	0.609129	0.63	0.2908-1.3637	0.240771	0.609389
C22_5_CE	0.48	0.2288-0.9873	0.0461164	1.24	0.5826-2.6493	0.574341	0.0771814
C52_4_TAG	2.29	0.943-5.5577	0.0671995	0.71	0.3307-1.5297	0.383172	0.0501444
N_ACETYL_L_ALANINE	1.46	0.8662-2.4755	0.15452	0.96	0.8513-1.0847	0.519179	0.127249
AMINOISOBUTYRIC_ACID	1.18	0.5057-2.7452	0.703893	1.52	0.6491-3.573	0.333686	0.679483
C16_1_LPC	0.71	0.3411-1.4827	0.363221	0.99	0.4616-2.1313	0.983322	0.538984
C52_2_TAG__NH4	1.42	0.6017-3.34	0.424794	0.5	0.2228-1.1291	0.0955635	0.0830101
C14_2_CARNITINE	0.91	0.3675-2.238	0.831993	1.49	0.658-3.3799	0.338386	0.427796
THREONINE	1.05	0.4932-2.2163	0.907535	0.63	0.2884-1.3714	0.243619	0.355116
TAURINE	0.86	0.378-1.9417	0.711022	1.9	0.6933-5.2159	0.211888	0.231705
C55_2_TAG	1.63	0.6861-3.8848	0.26776	0.44	0.1862-1.0286	0.0580385	0.0349823
_3_HYDROXYANTHRANILIC_ACID	1.54	0.5905-4.0178	0.377143	0.52	0.2485-1.1067	0.090278	0.0799509
C44_13_PE_PLASMALOGEN	1.1	0.5141-2.3666	0.801224	0.62	0.3107-1.2339	0.172984	0.274662
C34_2_DAG__NH4	1.16	0.5359-2.5094	0.706903	0.59	0.2666-1.3005	0.190145	0.230985
C56_8_TAG	0.56	0.2264-1.3743	0.204472	0.91	0.4309-1.9392	0.814962	0.417688
TYROSINE	1.85	0.7651-4.466	0.172201	0.36	0.1505-0.8572	0.0210414	0.00960788
C36_3_PC	1.27	0.6199-2.5928	0.515747	0.54	0.257-1.1391	0.105856	0.104505
C38_4_PC_PLASMALOGEN	0.78	0.3728-1.6141	0.49683	1.04	0.4683-2.2996	0.927316	0.602174
BETA_ALANINE	1.1	0.5169-2.3597	0.797685	1.02	0.4527-2.3032	0.959863	0.894187
C34_3_DAG	1.15	0.5034-2.6221	0.741738	0.6	0.2754-1.328	0.210158	0.26334
C24_1_CERAMIDE__D18_1_	0.84	0.4225-1.679	0.625647	0.7	0.3168-1.5396	0.373458	0.733411
C34_1_PC_PLASMALOGEN_B	0.76	0.3655-1.5987	0.47546	0.78	0.3565-1.6976	0.52821	0.962188
_3_HYDROXYBUTYRIC_ACID	0.65	0.2827-1.4877	0.306639	1.02	0.495-2.1097	0.953264	0.42298
C56_6_TAG__NH4	0.95	0.429-2.099	0.896996	0.7	0.3424-1.4463	0.33905	0.576612
C45_0_TAG	0.99	0.4565-2.1499	0.981121	0.78	0.3354-1.8049	0.558792	0.68289
C53_3_TAG	2.63	1.0012-6.8855	0.0497042	0.66	0.2919-1.4815	0.311795	0.0315957
C22_6_CE	0.43	0.1766-1.0344	0.0594314	1.21	0.5342-2.7408	0.647774	0.0921469
GLN_SOURCE_FRAGMENT	1.02	0.4645-2.2473	0.957386	1.21	0.5319-2.7716	0.644988	0.769254
CARNOSINE	1.14	0.5456-2.401	0.721058	1.16	0.5216-2.5963	0.711245	0.975101
C32_2_DAG	1.06	0.4901-2.3036	0.877832	0.64	0.2991-1.376	0.254191	0.362838
C56_1_TAG	1.32	0.5477-3.1787	0.536647	0.59	0.2664-1.3226	0.201974	0.184559
SERINE	0.8	0.3324-1.9078	0.609397	0.82	0.392-1.7299	0.607975	0.966327
INDOLE_3_CARBOXYLIC_ACID	1.06	0.7492-1.5064	0.734083	1.83	0.7797-4.2781	0.165434	0.24472
GLYCOCHENODEOXYCHOLIC_ACID	1.93	0.8411-4.4397	0.120606	0.98	0.4723-2.0424	0.961677	0.230634
UROCANIC_ACID	0.82	0.2966-2.276	0.705438	1.17	0.5179-2.6515	0.703455	0.59364
C36_4_DAG__NH4	1.02	0.4465-2.3267	0.963884	0.7	0.31-1.5954	0.399592	0.525724
INDOLE_3_PROPANOIC_ACID	0.72	0.331-1.5823	0.41785	0.92	0.4023-2.1155	0.849071	0.673565
C36_2_PE	1.85	0.7501-4.5529	0.181904	0.55	0.2646-1.147	0.111076	0.0407899
GLUTAMINE	1	0.4571-2.1672	0.990525	1.2	0.5322-2.6997	0.661771	0.750671
C30_0_DAG	1.1	0.5107-2.3708	0.807197	0.67	0.2916-1.5381	0.344666	0.39049
C38_6_PE	1.38	0.5847-3.2488	0.46342	0.56	0.2606-1.1878	0.129735	0.122543
C58_7_TAG	1.26	0.5698-2.7844	0.568606	0.99	0.4965-1.982	0.981777	0.65344
C2_CARNITINE	0.47	0.1862-1.1813	0.108176	1.92	0.928-3.9536	0.0787715	0.0188051
_3_DEHYDROXYCARNITINE	0.54	0.2025-1.4513	0.222977	1.1	0.4565-2.6375	0.835742	0.290262
_1_5_AG___1_DEOXYGLUCOSE	0.9	0.7245-1.118	0.341192	1.29	0.761-2.2033	0.340562	0.219042
C56_3_TAG	2.47	1.0759-5.6598	0.0329533	0.64	0.309-1.3376	0.237225	0.0168146
ADMA	1.1	0.4514-2.6985	0.828869	1.04	0.5026-2.1381	0.922509	0.923868
SPHINGOSINE	0.59	0.291-1.2071	0.149494	1.31	0.7103-2.4272	0.384951	0.096248
C34_1_DAG	1.26	0.5727-2.7881	0.562241	0.61	0.2697-1.3664	0.227888	0.20966
C58_6_TAG	0.94	0.4373-2.0223	0.875035	0.76	0.3741-1.5424	0.44675	0.689579
HISTIDINE	1.03	0.4451-2.3769	0.947374	0.79	0.4313-1.4568	0.454301	0.615538
C36_2_DAG__NH4	1.38	0.6494-2.9519	0.399636	0.57	0.263-1.2168	0.144895	0.107566
C54_4_TAG__NH4	2.29	0.9332-5.6286	0.070426	0.68	0.3119-1.4834	0.332745	0.0454473
C36_4_PE	1.33	0.5796-3.0491	0.501381	0.73	0.367-1.4563	0.372965	0.275805
C58_6_TAG__NH4	1.28	0.5792-2.8172	0.544038	0.6	0.2821-1.2771	0.185153	0.174421
C36_3_DAG__NH4	1.38	0.6064-3.1542	0.440866	0.54	0.2473-1.1716	0.118547	0.104694
INDOXYL_SULFATE	0.8	0.372-1.7248	0.570803	1.39	0.6717-2.8888	0.373084	0.306299
ALPHA_GLYCEROPHOSPHOCHOLINE	0.77	0.3423-1.7264	0.524032	1.57	0.6774-3.6466	0.292353	0.231658
C60_12_TAG__NH4	0.69	0.2969-1.5933	0.382603	0.93	0.4173-2.0667	0.85609	0.614024
XANTHURENIC_ACID	1.3	0.6506-2.5851	0.460225	0.89	0.4417-1.7784	0.733982	0.448677
C12_CARNITINE	0.96	0.4019-2.3031	0.930856	1.33	0.5696-3.0969	0.51116	0.599269
KYNURENIC_ACID	1.36	0.5935-3.0943	0.470624	0.86	0.3866-1.8973	0.702512	0.433312
C55_3_TAG	3.07	1.2424-7.6033	0.0151108	0.54	0.2458-1.1657	0.115495	0.00434076
C36_3_PS_PLASMALOGEN	1.32	0.5718-3.0476	0.515305	1	0.4574-2.1717	0.993365	0.634039
PTERIN	0.58	0.2419-1.4101	0.23174	1.13	0.546-2.33	0.745122	0.252189
C52_2_TAG	1.4	0.598-3.2865	0.437086	0.57	0.2633-1.2545	0.164326	0.12746
C20_4_CARNITINE	0.77	0.3189-1.8525	0.557646	1.73	0.7549-3.9572	0.195456	0.189166
C52_3_TAG	1.56	0.6549-3.7333	0.314116	0.79	0.3731-1.6598	0.529091	0.244733
C52_3_TAG__NH4	1.44	0.6068-3.4356	0.406316	0.54	0.2487-1.1808	0.123111	0.0990181
_1_2_4_TRIMETHYLBENZENE	1.13	0.5464-2.3437	0.739147	0.68	0.3042-1.5154	0.344474	0.358383
TAURODEOXYCHOLIC_ACID___TAUROCHE	1.91	0.8491-4.2907	0.117797	0.81	0.392-1.6593	0.559012	0.121135
ATP	0.88	0.6749-1.1428	0.333846	1.1	0.8995-1.3373	0.361383	0.18458
C22_4_CE	0.61	0.3193-1.1588	0.13061	1.55	0.721-3.3109	0.263195	0.0670701
C56_5_TAG__NH4	1.15	0.5214-2.5353	0.729401	0.68	0.3267-1.4364	0.316605	0.341789
C54_2_TAG__NH4	1.52	0.6525-3.563	0.329945	0.55	0.2418-1.257	0.156733	0.0921635
PUTRESCINE	0.48	0.2169-1.0715	0.0733558	2.38	1.1135-5.106	0.0253109	0.00445844
GABA	1.18	0.5559-2.5097	0.66491	1.31	0.5717-3.0164	0.52069	0.855174
GLUCOSE_FRUCTOSE_GALACTOSE_WATER	0.95	0.2601-3.5015	0.943899	1.12	0.5423-2.3233	0.755604	0.828519
INOSINE	1.08	0.4977-2.3384	0.847572	1.29	0.5696-2.9377	0.538511	0.757416
C34_3_PE_PLASMALOGEN	1.26	0.6169-2.5751	0.525538	0.64	0.3182-1.2786	0.205034	0.182974
C56_4_TAG__NH4	1.94	0.9005-4.1798	0.0905808	0.48	0.2278-1.0131	0.0541268	0.0105488
C58_8_TAG__NH4	0.96	0.4235-2.1568	0.91326	0.76	0.3716-1.5534	0.451437	0.672586
PUTATIVE_1_METHYLGUANOSINE	1.26	0.5914-2.7018	0.54539	0.87	0.3934-1.9147	0.725635	0.508072
URIDINE	0.91	0.3572-2.2948	0.834031	1.36	0.5712-3.2163	0.49041	0.535045
C36_1_PC_PLASMALOGEN	1.35	0.6474-2.7949	0.426863	0.99	0.4705-2.0951	0.984977	0.560831
PHOSPHOCREATINE	0.84	0.3367-2.1119	0.715881	1.56	0.6544-3.7122	0.316156	0.336847
C36_1_PE_PLASMALOGEN	1.16	0.6647-2.0408	0.594228	0.81	0.3608-1.8047	0.601459	0.47306
BILIRUBIN	0.69	0.3059-1.5445	0.364105	1.29	0.5187-3.2183	0.582211	0.314779
PIPECOLIC_ACID	0.96	0.4919-1.8797	0.908678	1.13	0.5617-2.2798	0.729386	0.741691
GLYCINE	0.81	0.3727-1.743	0.583602	1.65	0.7188-3.7935	0.237275	0.21892
C36_3_PE	3.18	1.2522-8.0824	0.0149841	0.64	0.3089-1.3199	0.225984	0.00784106
ASPARAGINE	1.04	0.4574-2.3438	0.93337	1.22	0.5219-2.8581	0.644934	0.790744
C56_5_TAG	0.9	0.4062-2.0129	0.805303	1.14	0.5405-2.4139	0.727682	0.672364
C36_4_PE_PLASMALOGEN	1.89	0.9304-3.8549	0.0782383	0.73	0.3715-1.4169	0.347428	0.0561619
OLEOYL_SERINE	0.81	0.3594-1.8447	0.622341	0.97	0.4376-2.1474	0.93897	0.756783
C54_3_TAG__NH4	2.1	0.8814-4.9854	0.0940409	0.64	0.2886-1.416	0.270132	0.0476694
GLUTATHIONE_REDUCED	1.25	0.5622-2.7611	0.588212	1.42	0.5812-3.4807	0.440356	0.834687
DEOXYCHOLIC_ACID	0.69	0.3161-1.5185	0.35938	1.66	0.785-3.4976	0.18519	0.112263
C36_2_DAG	1.5	0.6909-3.2588	0.305102	0.59	0.2722-1.2594	0.170741	0.0933787
C16_1_CE	0.72	0.3023-1.7168	0.459172	1.11	0.4661-2.6511	0.811438	0.489862
C18_1_CE	0.45	0.1955-1.0383	0.0612519	1.55	0.6886-3.4916	0.289501	0.0373683
C40_7_PC_PLASMALOGEN	1.1	0.485-2.4875	0.821925	1.06	0.5193-2.1462	0.880952	0.946523
C56_2_TAG__NH4	1.62	0.7338-3.569	0.232867	0.54	0.2486-1.1856	0.125333	0.052729
C30_0_DAG__NH4	1.3	0.5642-2.9737	0.54177	0.66	0.2666-1.623	0.363384	0.279011
C34_1_PC_PLASMALOGEN_A	1.47	0.6369-3.3884	0.367054	0.86	0.3932-1.8657	0.696549	0.357613
MYRISTOLEIC_ACID	1.42	0.6775-2.9606	0.354986	0.94	0.4235-2.0935	0.882613	0.457078
C20_CARNITINE	1.08	0.571-2.0524	0.807927	0.76	0.3585-1.594	0.462295	0.483404
TRYPTOPHAN	2.12	0.8909-5.0221	0.0894624	0.63	0.3009-1.3176	0.219465	0.0364674
C34_0_DAG	1.36	0.6706-2.7593	0.393907	0.62	0.3104-1.2335	0.172627	0.119163
C16_CARNITINE	0.36	0.113-1.1423	0.0828143	1.53	0.6233-3.7747	0.351797	0.0530395
C20_4_CE	0.55	0.2667-1.1264	0.101786	1.68	0.7957-3.5368	0.173997	0.034801
PUTATIVE_2_METHYLGUANOSINE	1.22	0.5862-2.5249	0.598613	0.8	0.3456-1.8318	0.591028	0.455523
HISTAMINE	0.95	0.4707-1.8991	0.874861	1.19	0.5505-2.5941	0.652368	0.671997
ASPARTIC_ACID	1.17	0.4887-2.7856	0.728273	0.66	0.2928-1.4942	0.320148	0.346599
P_METHYLHIPPURIC_ACID	0.62	0.2347-1.6564	0.343344	1.68	0.7063-3.9937	0.240673	0.134573
C16_1_MAG	1.59	0.6049-4.178	0.347051	0.9	0.4409-1.8327	0.769381	0.352807
N_ACETYLPUTRESCINE	1	0.4957-2.0105	0.996217	1.04	0.5255-2.0571	0.911014	0.937324
C16_0_CE	0.45	0.2074-0.9853	0.045811	1.43	0.6766-3.0115	0.350065	0.0357253
ACETYLCHOLINE	1.05	0.5023-2.1804	0.903286	0.79	0.3803-1.6392	0.526109	0.590244
CITRIC_ACID_ISOCITRIC_ACID	0.84	0.3288-2.1449	0.715074	1.29	0.4898-3.3779	0.60929	0.532149
ALANINE	1.08	0.5001-2.341	0.841433	0.83	0.3844-1.8036	0.642288	0.636599
_2_KETOISOVALERIC_ACID_KIV	0.71	0.322-1.5771	0.403159	1.67	0.6912-4.0472	0.253916	0.158297
LYSINE	1.19	0.5506-2.5551	0.662844	0.81	0.38-1.7307	0.588021	0.484578
C38_4_DAG_1	1.7	0.7756-3.7395	0.184617	0.53	0.2428-1.175	0.118962	0.0402397
C36_3_PE_PLASMALOGEN	1.43	0.6531-3.1099	0.373508	0.67	0.3298-1.3733	0.276518	0.159835
D_GLUCONIC_ACID	0.72	0.3147-1.6553	0.441264	2.37	1.0003-5.6325	0.049904	0.0513137
C42_11_PE_PLASMALOGEN	1.17	0.585-2.3573	0.651348	0.72	0.3326-1.5481	0.397608	0.359128
C56_7_TAG	1.04	0.4596-2.346	0.927879	0.96	0.4685-1.9535	0.903136	0.884875
C18_2_SM	0.75	0.3821-1.4909	0.417881	1.25	0.5459-2.8544	0.599242	0.349958
GUANINE	0.76	0.3204-1.8023	0.533132	1.13	0.5002-2.5725	0.762879	0.513584
ACETAMINOPHEN	1.21	0.5891-2.4869	0.603291	0.83	0.4256-1.6167	0.582936	0.451723
_2_HYDROXYBUTYRIC_ACID	0.98	0.4515-2.1163	0.953837	1.1	0.4639-2.6235	0.824231	0.84534
C18_CARNITINE	0.71	0.2834-1.763	0.456869	1.27	0.5473-2.9534	0.576594	0.35928
ARACHINDONOYL_PHENYLALANINE	0.71	0.3619-1.4032	0.32706	1.31	0.6624-2.6054	0.434838	0.212669
C36_2_PC_PLASMALOGEN	1.32	0.6353-2.7498	0.455474	0.9	0.4484-1.8121	0.770701	0.458261
PUTATIVE_3_AMINOISOBUTYRIC_ACID	1.33	0.6772-2.6039	0.40917	0.84	0.473-1.4791	0.539129	0.307322
COTININE	2.31	0.503-10.5673	0.282261	0.62	0.1545-2.4874	0.500038	0.21103
C56_6_TAG	0.67	0.289-1.5372	0.341288	1.29	0.6302-2.6291	0.488413	0.242767
C36_4_DAG	1.49	0.5962-3.7151	0.394196	0.69	0.3078-1.5684	0.380725	0.217908
C34_2_PE	1.72	0.7932-3.7507	0.168994	0.71	0.3633-1.406	0.330575	0.0922922
_3_AMINOISOBUTYRIC_ACID	0.88	0.4122-1.8644	0.732427	1.05	0.4545-2.4064	0.91605	0.758135
C56_2_TAG	1.79	0.7926-4.043	0.161247	0.67	0.3202-1.4049	0.289729	0.0800053
C58_8_TAG	0.79	0.3622-1.7077	0.543701	1.21	0.5556-2.6256	0.633686	0.446351
C34_2_DAG	1.33	0.6114-2.8806	0.474132	0.68	0.2982-1.5393	0.352436	0.244077
C36_3_DAG	1.63	0.69-3.8596	0.264794	0.58	0.2592-1.2906	0.181201	0.0852898
C54_2_TAG	1.63	0.6778-3.9261	0.274831	0.59	0.256-1.3818	0.227019	0.101812
C47_0_TAG__NH4	1.22	0.6538-2.2911	0.527622	0.77	0.3973-1.5005	0.445496	0.32346
C40_6_PE	1.39	0.7236-2.6819	0.321183	0.69	0.3976-1.1946	0.184701	0.108523
C18_3_CE	0.4	0.1622-1.0033	0.0508312	1.63	0.7113-3.716	0.249251	0.0252062
C56_3_TAG__NH4	2.23	0.9789-5.0729	0.0562272	0.56	0.2657-1.1889	0.131744	0.0149274
SPHINGOSINE_ISOMER3	0.86	0.3394-2.1884	0.754486	1.03	0.4692-2.2445	0.948386	0.77141
CYTOSINE	1.4	0.6647-2.9303	0.378403	0.71	0.3037-1.6543	0.426037	0.237388
SDMA	0.84	0.3538-1.9984	0.694786	0.88	0.4018-1.9481	0.761077	0.937963
C18_2_CE	0.67	0.3183-1.4119	0.292657	1.29	0.5938-2.8095	0.518727	0.232922
HOMOCYSTEINE	0.73	0.3231-1.646	0.447199	1.29	0.6879-2.4052	0.43043	0.277148
S_ADENOSYLMETHIONINE	1.45	0.6226-3.3898	0.387661	0.63	0.2792-1.4362	0.27415	0.165583
N_ACETYLTRYPTOPHAN	1	0.5444-1.8503	0.990771	1.02	0.4941-2.1141	0.953169	0.96741
GUANOSINE	0.84	0.3556-1.9753	0.686346	1.13	0.506-2.5427	0.759552	0.621565
ARGININE	1.71	0.7805-3.7542	0.179733	0.68	0.3172-1.4514	0.317404	0.0982425
C34_4_PC_PLASMALOGEN	1.44	0.7267-2.8363	0.297845	0.87	0.4438-1.7109	0.689136	0.302837
PROLINE_BETAINE	1.09	0.4572-2.6183	0.839994	0.86	0.4053-1.8372	0.702114	0.687375
C14_CARNITINE	0.82	0.407-1.6599	0.584596	1.04	0.474-2.2855	0.920478	0.658765
HYDROXYPHENYLPYRUVIC_ACID	1.09	0.6515-1.8176	0.746786	0.89	0.5151-1.5332	0.671408	0.595662
C18_0_MAG__NH4	0.59	0.2154-1.64	0.315032	2.05	0.8249-5.1084	0.122069	0.0735717
_5_HYDROXYTRYPTOPHAN	1.08	0.4107-2.8151	0.882611	0.95	0.3656-2.4872	0.92264	0.853191
N_ACETYL_L_GLUTAMINE	0.94	0.7782-1.1466	0.564456	1.83	0.836-3.9957	0.130772	0.105151
PHENYLACETYLGLYCINE	0.74	0.313-1.7452	0.490353	1.37	0.5857-3.1844	0.470627	0.316922
UDP_GLCNAC	0.77	0.3081-1.924	0.575832	1.29	0.4917-3.392	0.603725	0.447305
OLEOYL_PHENYLALANINE	1.77	0.8765-3.5625	0.111521	0.44	0.1848-1.0308	0.058639	0.0139017
C20_3_CE	0.45	0.2069-0.9835	0.0452981	1.72	0.8043-3.667	0.162329	0.0156809
C58_9_TAG	0.74	0.3193-1.7133	0.481613	1.14	0.5179-2.5062	0.745901	0.462212
NMMA	1.05	0.4636-2.3944	0.900793	0.83	0.4192-1.6258	0.579295	0.665086
